# Supplementary material for: Deciphering the evolution of birdwing butterflies 150 years after Alfred Russel Wallace
Source: PubMed Central journal article supplement (PMC4488763; doi:10.1038/srep11860), 2015-07-02

## Supplementary Material

### Deciphering the evolution of birdwing butterflies 150 years after Alfred

Russel Wallace

*Fabien L. Condamine, Emmanuel F.A. Toussaint, Anne-Laure Clamens, Gwenaelle Genson,*

*Felix A.H. Sperling and Gael J. Kergoat*

#### Contents

**Supplementary Text S1.** Expanded Results.

**Supplementary Text S2.** Expanded Materials and Methods.

**Supplementary Table S1.** Results of biogeographical analyses.

**Supplementary Table S2.** Results of diversity-dependence diversification analyses.

**Supplementary Table S3.** Results of trait-dependence (GeoSSE) diversification analyses.

**Supplementary Table S4.** Results of palaeo-environmental-dependence diversification analyses.

**Supplementary Table S5.** Taxon sampling and GenBank accession numbers.

**Supplementary Figure S1.** Geographic distribution of *Ornithoptera priamus* and its subspecies (a), and *Troides helena* and its subspecies (b).

**Supplementary Figure S2.** Bayesian phylogenies of specimen-level dataset for single genes (in order: COI, ND5, 16S, and EF-1 $\alpha$ ) for assessment of species monophyly.

**Supplementary Figure S3.** Biogeographical reconstructions using DEC, DEC+J, DIVA-like, DIVA-like+J, BayArea-like and BayArea-like+J models.

**Supplementary Figure S4.** Lineages-through-time plots of birdwing diversity.

**Supplementary Figure S5.** Bayesian MCMC of the best fitting GeoSSE model.

## Supplementary Text S1. Expanded Results

### *Molecular dataset and partitioning strategies*

The specimen-level datasets included DNA sequence from 124 specimens of birdwing butterflies for the COI gene (1,548 nucleotides), 92 specimens for the ND5 gene (907 nucleotides), 61 specimens for the 16S (518 nucleotides), and 67 specimens for the EF-1 $\alpha$  gene (600 nucleotides). The best-fit partitioning scheme for COI ( $BIC_{\text{linked}}=17800.19$  and  $BIC_{\text{unlinked}}=18749.47$ ) was a separate partition for each codon and its own substitution model, as follows: first codon (TrN+G), second codon (HKY+G), and third codon (TIM+G). The best-fit partitioning scheme for ND5 ( $BIC_{\text{linked}}=11399.75$  and  $BIC_{\text{unlinked}}=11798.65$ ) was two partitions: one for the first and third codon (HKY+I+G) and one for the second codon (TIM+G). The best-fit substitution model for 16S was a GTR+I+G. No partitioning scheme is possible with a ribosomal RNA gene. The best-fit partitioning scheme for EF-1 $\alpha$  ( $BIC_{\text{linked}}=3971.64$  and  $BIC_{\text{unlinked}}=4147.06$ ) was a separate partition for each codon and its own substitution model, as follows: first codon (TrN+I), second codon (JC+I), and third codon (K80+G). The final dataset contained 182 birdwing specimens, of which 107 are *Troides*, 68 are *Ornithoptera* and 7 are *Trogonoptera*

### *Species monophyly*

Many old specimens failed to amplify several genes, resulting in missing data and impeding our creation of a supermatrix including all specimens for all genes. However the gene tree approach still allows an effective solution to testing species boundaries with independent analyses.

When reconstructing the gene trees, we used the partitioning scheme and among-site rate variation suggested by PartitionFinder (see below) but instead of selecting one

substitution model a priori, we used reversible-jump Markov Chain Monte Carlo (rj-MCMC) to allow sampling across the entire substitution rate model space (see Supplementary Text S2). We also performed phylogenetic analyses using the substitution model provided by PartitionFinder, and we found identical results with phylogenies estimated using rj-MCMC (results not shown).

Within *Ornithoptera*, all recognized morphological species had monophyletic gene trees. The fact that all morphological species (including the species in the subgenus *Ornithoptera* (five species)) exhibit reciprocal monophyly allowed us to maintain the species status of these species. While some of the species, like *Ornithoptera goliath*, show strong mtDNA divergence among subspecies that may lead us to consider two putative species (one in the Moluccas and one in New Guinea) for the macroevolutionary analyses, we preferred to use a conservative approach and retain the morphological species.

In *Troides*, all morphological species had monophyletic gene trees, except one species. *Troides haliphron* was recovered as paraphyletic for both mtDNA and nucDNA due to the inclusion of *T. staudingeri*. This pattern holds regardless of the molecular dataset. This result suggests that two molecular lineages with different evolutionary trajectories can be recognised as they have a disjunct distribution pattern in Wallacea, with *T. haliphron* subspecies *haliphron* and *purabu* occurring in South Sulawesi and the Selayar Islands, whereas *T. haliphron* subspecies *socrates* and *naias* occur in in the Lesser Sunda archipelago (Sumbawa to Alor islands)<sup>1</sup>. Consequently, we treat the two clades of *T. haliphron* as two putative species. Divergence between *T. helena* and *T. oblongomaculatus* is recent. Only mtDNA revealed detectable molecular differences between the two species (no genetic variation for the nucDNA). The data suggest either a recent speciation event or that the two species are incipient species (speciation not completed).

The results of the phylogenetic analyses for each gene (except the wingless gene since we obtained only limited taxon sampling) are presented in the Supplementary Fig. S2.

### ***Species relationships, dating and difference between the speciation tree prior***

All Bayesian analyses of the species-level dataset inferred the same topology. The genus *Trogonoptera* is found as sister to the two other genera with the highest support. Within the two species-rich genera, the molecular relationships strongly agree with previous morphological works (e.g.<sup>2-4</sup>). Node support values are good to high despite the incompleteness of our molecular matrix ( $\approx 60\%$  complete), with  $\approx 70\%$  of nodes with posterior probability  $\geq 0.95$ . The four missing species can be assigned based on morphology: *T. darsius* is considered as closely related to the *T. haliphron* group, *T. minos* is likely to be closely related to *T. helena*, whereas *T. dohertyi* and *T. plateni* are thought to constitute the sister clade of *T. rhadamantus*. Adding those species in future should clarify some relationships within these groups and will likely strengthen phylogenetic support within *Troides*.

*Dating with the Yule prior.* We inferred an origin of birdwings in the late Oligocene around 25.9 Myr ago (95% HPD 22.2-29.9 Myr ago). The genera *Ornithoptera* and *Troides* diverged in the early Miocene around 19.3 Myr ago (95% HPD 16.3-22.8 Myr ago). Both genera diversified in the middle Miocene around 11.5 Myr ago (95% HPD 8.4-15.3 Myr ago), and around 13.6 Myr ago (95% HPD 10.8-16.4 Myr ago), respectively. The genus *Trogonoptera* diversified in the Pleistocene about 1.04 Myr ago (95% HPD 0.25-2.4 Myr ago).

*Dating with the birth-death prior.* We inferred an origin of birdwings in the late Oligocene around 25.8 Myr ago (95% HPD 22.1-29.9 Myr ago). The genera *Ornithoptera* and *Troides* diverged in the early Miocene around 19.1 Myr ago (95% HPD 16-22.6 Myr

ago). Both genera diversified in the middle Miocene around 11.4 Myr ago (95% HPD 8.6-15.3 Myr ago), and around 13.5 Myr ago (95% HPD 10.8-16.4 Myr ago), respectively. The genus *Trogonoptera* diversified in the Pleistocene about 1.03 Myr ago (95% HPD 0.26-2.3 Myr ago).

The close correspondence between dates obtained with Yule and birth-death prior indicates that the choice of the speciation tree prior had no effect on age estimates. However, their marginal likelihood estimates are significantly different based on a Bayes factor  $> 6.0$  (MLE of the Yule prior = -28967.55 and MLE of the birth-death prior -28977.37; BF = 9.82).

### ***Diversification rates***

All diversification analyses were conducted on the posterior trees that resulted from the dating analyses with the Yule prior as the branching process. Diversification analyses using only the MCC tree reconstructed with the birth-death prior indicated no difference from analyses of the MCC reconstructed with the Yule prior (results not shown).

The palaeo-environmental models of Condamine et al.<sup>5</sup> are directly comparable since they rely on the same likelihood framework. To show the relative performance of one model over another, we also computed the Akaike weights (the relative likelihood of the model compared to others) for all these models. The best model is the one with constant speciation and varying extinction (Fig. 3 of the main text). Within this model, the palaeo-environmental models have similar performances (none of them is significantly more supported than the other) and outperform the simple time-dependence model. This result suggests that past environmental changes may have impacted the diversification dynamics of birdwing butterflies.

## Text S2. Expanded Materials and Methods

### *Taxon sampling*

All species of birdwing butterflies are currently included in CITES and/or IUCN lists in order to protect them by regulating their commercial trade. Direct sampling in the wild is almost impossible and it is difficult to obtain specimens suitable for DNA extraction via alternative means. In this study, the total sampling includes 182 birdwing specimens for which half of them (85 specimens) came from quarantine interception at the Canadian border. This material was sent to Dr. Donald Lafontaine, of the Canadian National Collection of Insects, Arachnids and Nematodes (CNC) of Agriculture and Agri-Food Canada. These specimens were then made available to Dr. Felix Sperling on an indefinite long-term loan so that they could be preserved as frozen genetic material for future research at the Strickland Museum of Entomology, University of Alberta, Canada. Despite intense efforts, DNA sequencing was arduous and few genes were amplified (Supplementary Table S4). We considered next-generation approaches to sequence some of our specimens (“museomics”<sup>6</sup>), but this represented funding challenges, timelines and technical complexities (e.g. working with dried specimens that have degraded DNA) that made these approaches impossible to implement within the framework of our project. Finally, the rest of the sampling (97 specimens) came from previous studies, and in particular for several rare species (e.g. *Ornithoptera alexandrae*, *O. meridionalis*, *O. paradisea*, *O. victoriae*, *Troides andromache*, *T. miranda*). Thus we used DNA sequence data from GenBank that has been already published in earlier studies (e.g.<sup>2-4</sup>).

*Ornithoptera allotei* (Rothschild, 1914) was not considered as a valid species because it is a natural hybrid between *O. priamus urvilleanus* and *O. victoriae* in the Solomon Islands<sup>7</sup>. For the same reason, *Ornithoptera akakeae* (Kobayashi & Koiwaya, 1978) was also

not treated as a valid species (it is an hybrid between *O. priamus aureus* × *O. tithonus misresiana*)<sup>7</sup>.

### ***Molecular dataset***

The molecular dataset consisted of DNA sequence for three mitochondrial gene fragments: cytochrome c oxidase subunit I (COI, 1,550 aligned nucleotides), NADH dehydrogenase 5 (ND5, 907 aligned nucleotides), 16S rRNA (16S, 511 aligned nucleotides), and two nuclear gene fragments: elongation factor 1 alpha (EF-1 $\alpha$ , 995 aligned nucleotides) and wingless (Wg, 425 aligned nucleotides). For newly sequenced specimens, total genomic DNA was extracted from legs using the Qiagen® DNeasy tissue kit (Qiagen, Venlo, Netherlands). Polymerase chain reactions were performed using the following program: an initial 2 min denaturation step at 94°C, followed by 35 cycles of 1 min at 94°C, 1 min at 47-57°C (depending on primer combinations) and 1 min at 72°C and then a 7 min final extension step at 72°C. Nucleotide sequences of the primers used are standard and have been previously described and summarized<sup>8</sup>.

### ***Alignment and partitioning strategies***

Sequences were assembled into contiguous arrays using Geneious Pro 5.1.7 ([www.geneious.com](http://www.geneious.com)). The sequences were aligned with those retrieved from a previous study using MAFFT<sup>9</sup> with default settings. Reading frames of protein-coding genes were checked under Mesquite 2.75 ([www.mesquiteproject.org](http://www.mesquiteproject.org)).

To determine the best-fit partitioning scheme of molecular evolution for our dataset, we used PartitionFinder 1.1.1<sup>10</sup>. In order to assess species monophyly independently with each gene (see above), we first estimated the best partitioning strategy for each individual gene of a given specimen-level dataset (e.g. 124 specimens for the COI gene). Second we

repeated this procedure for the species-level dataset, i.e. including one specimen per species. The partitioning scheme was then used for BEAST dating analyses. For PartitionFinder analyses branch lengths were *unlinked* to allow the program to estimate them independently for each subset. The best model, among the ones available in MrBayes 3.2.2<sup>11</sup>, was searched for under the *greedy* search algorithm based on the Bayesian Information Criterion (BIC) model metric. Based on BIC scores for each partition, GTR+I+G or HKY+G model were the best-scoring models, followed closely by the SYM+I+G and HKY+I+G models. We used the partitioning scheme suggested by PartitionFinder but instead of using a specific model for each partition we used the *mixed* model option. The latter allows to sample across the substitution model space in the Bayesian Markov Chains Monte Carlo analysis itself ('rj-MCMC'), removing the need for a priori model testing<sup>12</sup>.

### ***Phylogenetic analyses and species monophyly***

To reconstruct independent gene trees we used the four genes for which we have a comprehensive taxon sampling (i.e. 124 specimens for the COI, 92 for the ND5, 61 for the 16S, and 67 for the EF-1 $\alpha$ ). For each gene, Bayesian inferences were performed with MrBayes 3.2.2 and the partitioning scheme inferred using PartitionFinder (see above). Analyses consisted of four rj-MCMC running for  $2 \cdot 10^7$  generations with sampling every 2,000 generations and the first 25% discarded as burn-in. As outgroups we used species from the two genera - *Cressida* and *Pharmacophagus* - that are most closely related to birdwing butterflies<sup>13</sup>. Convergence of runs was assessed by checking the potential scale reduction factor (PSRF) values of each parameter in MrBayes and the Effective Sample Size (ESS) values of each parameter in Tracer 1.6<sup>14</sup>. Value of PSRF close to 1.0 and  $ESS \geq 200$  were considered as good indicator of convergence. Nodes recovered with posterior probabilities (PP)  $\geq 0.95$  were considered to be strongly supported.



### *Calibrations and molecular dating*

For dating analyses, we used a subset of the concatenated dataset comprising only one specimen for each species (as defined by the specimen-level analyses). The applicability of a molecular clock was investigated for each node using PATHd8<sup>15</sup>. The hypothesis of a molecular clock was not statistically supported for the majority of the nodes ( $P < 0.05$ ; clock tests rejected for 42 of the 64 nodes). Therefore a dating approach that accounted for rate variation across lineages was used<sup>16</sup>.

Species-level phylogenetic and dating analyses were carried out with the program BEAST 1.8<sup>16</sup>. The .xml file for the BEAST analysis was created under the BEAUti interface with the following non-default settings and priors: *Site Models* were set for each partition according to the best-fit partitioning strategy as recovered by PartitionFinder (see above), *Clock Model* was set to an uncorrelated lognormal relaxed clock for each partition, *Tree Model* was set to a Yule or birth-death process of speciation (for comparison purpose), and *MCMC parameters* were set to  $5.10^7$  generations with sampling every 5,000 generations and the first 25% discarded as burn-in.

Six calibrations points were used to time-calibrate the tree. We relied on the fossil-calibrated tree of Papilionidae<sup>17</sup> to select the calibrations for strongly supported nodes that were recovered in several studies, and whose monophyly was supported by both molecular and morphological data<sup>8,17</sup>. We enforced the monophyly of these nodes so that BEAST did not re-estimate the whole topology. The following calibration points were used in our study:

1. the crown of Papilioninae was set between 40.61 and 57.39 Ma (with a starting value at 47.02 Ma);
2. the crown of Troidini was set between 32.45 and 46.92 Ma;
3. the crown of the genus *Battus* was set between 17.22 and 29.29 Ma;

4. the crown of the subtribe Troidina was set between 26.46 and 38.91 Ma;
5. the divergence between the genera *Euryades* and *Parides* was set between 22.77 and 34.22 Ma;
6. the crown of the genus *Parides* was set between 18.56 and 28.45 Ma.

No internal calibrations were used for birdwing butterflies because we wanted to re-estimate the age and credibility intervals without prior assumptions on their ages, and let BEAST estimate the phylogenetic relationships within the clade. *Graphium agamemnon* was used to root the phylogenetic tree as the tribe Leptocircini is closest to Troidini<sup>17</sup>. All calibrations were set with uniform distribution enforcing hard bounds for minimum and maximum ages as provided by the fossil-calibrated tree of Papilionidae<sup>17</sup> (minimum and maximum values correspond to the 95% height posterior density of ages from the study of Condamine et al.<sup>17</sup>). A random starting tree was reconstructed by fitting the corresponding calibration points.

Convergence and performance of the MCMC were evaluated using Tracer based on the ESS values for each parameter. A maximum-clade credibility tree was computed, with median age and 95% height posterior density (HPD) calculated using TreeAnnotator.

### ***Model selection: Yule model versus birth-death process***

In Bayesian analyses, harmonic mean estimates (HME) have traditionally been used to compare models. New approaches have improved model selection for phylogenetics, such as path sampling (PS,<sup>18</sup>) and stepping-stone sampling (SS,<sup>19</sup>), which allow a better estimation of the marginal likelihood estimate (MLE) of a given model<sup>20</sup>. Here we used SS because it outperforms both PS and HME for direct Bayes factor (BF) calculations<sup>21,22</sup>. Stepping-stone sampling is implemented in BEAST and, following the recommendation of Baele et al.<sup>22</sup>, we performed MLE using SS with a chain length of 1,000,000 iterations and a number of path

steps of 150. We then determined the power posteriors according to evenly spaced quantiles of a Beta (0.3, 1.0) distribution, thereby estimating more power posteriors close to the prior. The MLE allows direct BF calculation that we used to make pairwise comparisons between the Yule model and the birth-death process for a given calibration strategy. We considered BF values  $> 6.0$  to favour one model over another<sup>23</sup>.

### ***Estimation of biogeographical history***

Ancestral areas estimation was performed using the R-package “BioGeography with Bayesian (and likelihood) Evolutionary Analysis of RangeS” (BioGeoBEARS)<sup>24</sup>. Analyses were performed using the BEAST time-calibrated phylogenies (with outgroups removed).

Biogeographical models require the specification of operational discrete areas, and the biogeographical ranges of species consist of presence and absence in each area. These operational areas are often delimited by geological or oceanic features (which may have acted as barriers to dispersal). The distribution of birdwing butterflies ranges from western India to Australia (Fig. 1). We divided these two biomes into smaller biogeographic identities to get more resolution in the inference of the ancestral area of origin. To do so, we used tectonic reconstructions (e.g.<sup>25</sup>). The model comprised nine component areas: (A) India and Sri Lanka; (B) Malaysian Archipelago; (C) Philippines; (D) Sulawesi; (E) Lesser Sunda Islands; (F) Halmahera and Northern Moluccas; (G) New Guinea; (H); Solomon Islands and (I) Australia. The adjacency matrix was then designed by taking into account Earth’s geological history and the biological plausibility of combined ranges. All ranges larger than three areas in size that were not subsets of observed species ranges were discarded. Distributional data were compiled from monographs and reviews (e.g.<sup>1</sup>) and species ranges were defined by presence–absence data and by excluding marginal distributions.

We did not use smaller geographical areas for several reasons. The complexity of the geological history of the IAA region makes difficult to reliably estimate the past distribution of land and sea at a given point in time. For instance many uncertainties remain about the appearance of important geological areas like Halmahera or Sulawesi. Furthermore the build-up of the Philippines and New Guinea represents one of the most challenging palaeogeographical issues to date. It is also reasonable to limit the number of areas to some large, discrete areas, since these are most likely to be relatively "conserved" (i.e. change rarely) over evolutionary time; and we have to compromise with the computational limitations. Moreover our goal was not to reconstruct a precise history of all biogeographical events but to investigate whether the clade appeared in the Sahul shelf or in the Sunda shelf (as predicted by A.R. Wallace), and also to test evolutionary hypotheses on the biogeographical processes that shaped the current biodiversity pattern. For the latter, we were particularly interested in assessing the relative importance of vicariance and dispersal processes in explaining the range patterns observed on the phylogeny. Regarding dispersal patterns we teased apart dispersal leading to range expansion from jump dispersal leading to founder-event speciation<sup>24</sup>.

BioGeoBEARS is particularly adapted to examine competing hypotheses in island-dwelling clades<sup>24</sup>. Here we reconstructed the biogeographical history of birdwing butterflies using six models: DEC, DEC+J, DIVA-like, DIVA-like+J, BayArea-like, and BayArea-like+J. The BioGeoBEARS Dispersal-Extinction-Cladogenesis (DEC) is identical to the widely used model of Ree and Smith<sup>26</sup>, but here it is implemented in the R environment. The BioGeoBEARS "DIVA-like" model is not identical to Ronquist<sup>27</sup>'s parsimony DIVA. It is a likelihood interpretation of DIVA, which only allows the processes implement under DIVA (see Fig. 4 in<sup>28</sup>). The BioGeoBEARS "BayArea-like" model is not identical to the complete Bayesian model implemented in the BayArea program of Landis et al.<sup>29</sup>. Instead, it is a

simplified likelihood interpretation of the BayArea model that replicates BayArea's cladogenesis assumption (which postulates that nothing in particular happens at cladogenesis). The purpose of having a BayArea-like model was to test the potential importance of the cladogenesis model on particular datasets.

The three pairs of models were compared to see whether the inclusion of founder-event speciation (parameter J) significantly improved likelihood using AICc. We also used AICc and LRT to select the best-fit model out of the six that were implemented. The corresponding best-fit model was then used to make the final biogeographical reconstruction shown in Fig. 2 and Supplementary Fig. S3.

### ***Diversification analyses***

#### *Lineages-through-time.*

To visualize the tempo and mode of diversification of the group, we first reconstructed lineages-through-time (LTT) plots for the whole tree and for the genera *Ornithoptera* and *Troides* (Supplementary Fig. S4).

#### *Trait-dependent diversification.*

If there are *a priori* reasons to believe that features of a species (e.g. ecological or morphological traits, geographical locations) influence diversification, it is relevant to use trait-dependent diversification models that concurrently model trait evolution and its impact on diversification<sup>30,31</sup>. In those models, species are characterized by an evolving trait, and follow a birth-death process in which speciation and extinction rates depend on the value of the trait at that time. Several models derived from the Binary State Speciation and Extinction model (BiSSE,<sup>31</sup>) have been used in various biogeographic contexts, e.g. the Geographic

State Speciation and Extinction (GeoSSE,<sup>32</sup>). However, those models have rarely been applied in island biogeography.

Here we used 500 trees randomly selected from the Bayesian posterior distribution of dating analyses and we combined them with distributional data categorized in two traits: species occurring extra-Wallacea (trait A), and species occurring within Wallacea (trait B) [species can be widespread, i.e. occur within the two regions, and are coded AB]. We then fitted 12 GeoSSE diversification models to estimate the speciation rate for trait A ( $s_A$ ) and B ( $s_B$ ), the allopatric speciation rate between the two regions ( $s_{AB}$ ), the extinction rate ( $x_A / x_B$ ), and the transition rate between trait A/B and B/A (denoted  $q_{AB} / q_{BA}$ ).

Models are as follows (see also Supplementary Table S3):

- (i)  $s_A = s_B = s_{AB}$ ,  $x_A = x_B$ ,  $d_{AB} = d_{BA}$ ;
- (ii)  $s_A \neq s_B \neq s_{AB}$ ,  $x_A = x_B$ ,  $d_{AB} = d_{BA}$ ;
- (iii)  $s_A \neq s_B$ ,  $s_{AB} = 0$ ,  $x_A = x_B$ ,  $d_{AB} = d_{BA}$ ;
- (iv)  $s_A = s_B \neq s_{AB}$ ,  $x_A = x_B$ ,  $d_{AB} = d_{BA}$ ;
- (v)  $s_A = s_B \neq s_{AB}$ ,  $x_A \neq x_B$ ,  $d_{AB} = d_{BA}$ ;
- (vi)  $s_A = s_B \neq s_{AB}$ ,  $x_A = x_B$ ,  $d_{AB} \neq d_{BA}$ ;
- (vii)  $s_A = s_B = s_{AB}$ ,  $x_A \neq x_B$ ,  $d_{AB} = d_{BA}$ ;
- (viii)  $s_A = s_B = s_{AB}$ ,  $x_A = x_B$ ,  $d_{AB} \neq d_{BA}$ ;
- (ix)  $s_A \neq s_B \neq s_{AB}$ ,  $x_A \neq x_B$ ,  $d_{AB} = d_{BA}$ ;
- (x)  $s_A \neq s_B \neq s_{AB}$ ,  $x_A = x_B$ ,  $d_{AB} \neq d_{BA}$ ;
- (xi)  $s_A = s_B = s_{AB}$ ,  $x_A \neq x_B$ ,  $d_{AB} \neq d_{BA}$ ;
- (xii)  $s_A \neq s_B \neq s_{AB}$ ,  $x_A \neq x_B$ ,  $d_{AB} \neq d_{BA}$ .

Analyses were performed using the R-package *diversitree* 0.7-6<sup>33</sup> using the functions *make.geosse* to construct the likelihood functions for each model based on the data, and the functions *constrain* and *find.mle* to apply different diversification scenarios as detailed above.

For each GeosSE model, we computed the AICc. We checked support for the selected model against all models nested within it using the Likelihood Ratio Test (LRT, significant at  $P < 0.05$ ). The scenario supported by LRT and with the lowest AICc was considered the best. If the model with the lowest AICc was not supported by LRT, the model with the least parameters was considered the best. Net diversification rates ( $r = \lambda - \mu$ ) were computed from speciation and extinction rate estimates. Finally we used the maximum clade credibility (MCC) tree and a MCMC approach for the best model to examine the credibility intervals of the parameter estimates. We used an exponential prior  $1/(2r)$  to be as conservative as possible<sup>33</sup> and started the chain with the parameters obtained by maximum likelihood. We ran 20,000 steps of MCMC and applied a burn-in of 2,000 steps.

#### *Palaeo-environment-dependent diversification.*

To test the effect that past environment had on the diversification of birdwings, we used a birth-model derived from the one of Morlon et al.<sup>34</sup> that allows speciation and extinction rates to vary according to a past environmental variable itself varying through time<sup>5</sup>, such as past variations of temperature<sup>35</sup> or past fluctuations of sea level<sup>36</sup>.

Like the Morlon et al.<sup>33</sup>'s approach, we designed three models to test: (i) BVARDCST, speciation rate varies exponentially with temperature and extinction rate is constant; (ii) BCSTDVAR, speciation rate is constant and extinction rate varies exponentially with temperature; and (iii) BVARDDVAR, speciation and extinction rates both vary exponentially with temperature. We also repeated these three models with linear dependence with temperature. The tree was analyzed as a whole using this approach and the four missing species were taken into account (stating  $f=34/38$ ).

These models rely on a past environmental variable; as such any user needs to inform the model with data on how the environment varied through time. For temperature and sea

levels, such data exist and are compiled into tables. Here we relied on the well-known Cenozoic temperatures published by Zachos et al.<sup>35</sup>, and on the Phanerozoic sea levels published by Miller et al.<sup>36</sup>. Because there is fewer consensus on sea level curves than temperature curves, several analyses were performed with different sea level curves. We alternatively used the sea level data inferred by Haq<sup>37</sup>, Miller et al.<sup>36</sup>, and Kominz et al.<sup>38</sup>. Because very similar results (results not shown) were inferred using the different curves, we choose to only present the results based on the most recent sea level curve<sup>38</sup> in the main text.

The R package *pspline* (<http://cran.r-project.org/web/packages/pspline/pspline.pdf>) was used to reconstruct smooth lines of palaeo-data for each environmental variable. For instance, a smooth line is introduced in the birth-death model to represent the palaeo-environment through time, and at each point in time the model refers to this smooth line to give the temperature value of the temperature. Given the dated phylogeny, the model then estimates speciation and extinction rates as a function of this value.

For each diversification model, we computed the AICc. We also used Likelihood Ratio Tests (LRT, significant at  $P < 0.05$ ) to estimate support for a particular model when compared to the remaining models. The scenario supported by LRT and with the lowest AICc was considered as the best. If the model with the lowest AICc was not supported by LRT, the model with the least parameters was considered as the best.



### ***Supplementary references***

1. Haugum, J. & Low, A. M. *A monograph of the birdwing butterflies. The systematics of Ornithoptera, Troides and related genera* (Denmark, Scandinavian Science Press, 1978-1985).
2. Morinaka, S. et al. Molecular phylogeny of birdwing butterflies based on the representatives in most genera of the tribe Troidini (Lep., Papilionidae). *Entomol. Sci.* **2**, 347-358 (1999).
3. Kondo, K., Shinkawa, T. & Matsuka, H. Molecular systematics of birdwing butterflies (Papilionidae) inferred from mitochondrial ND5 gene. *J. Lepido. Soc.* **57**, 17-24 (2003).
4. Braby, M. F., Trueman, J. W. H. & Eastwood, R. When and where did troidine butterflies (Lepidoptera: Papilionidae) evolve? Phylogenetic and biogeographic evidence suggests an origin in remnant Gondwana in the Late Cretaceous. *Invert. Syst.* **19**, 113–143 (2005).
5. Condamine, F. L., Rolland, J. & Morlon H. Macroevolutionary perspectives to environmental change. *Ecol. Lett.* **16**, 72-75 (2013).
6. Guschanski, K. et al. Next-generation museomics disentangles one of the largest primate radiations. *Syst. Biol.* **62**, 539-554 (2013).
7. Hancock, D. L. Notes on the phylogeny and biogeography of *Ornithoptera* Boisduval (Lepidoptera: Papilionidae). *Tyô to Ga* **42**, 17–36 (1991).
8. Simonsen, T. J. et al. Phylogenetics and divergence times of Papilioninae (Lepidoptera) with special reference to the enigmatic genera *Teinopalpus* and *Meandrusa*. *Cladistics* **27**, 113–137 (2011).
9. Katoh, K. & Standley, D. M. MAFFT multiple sequence alignment software version 7: improvements in performance and usability. *Mol. Biol. Evol.* **30**, 772-780 (2013).

10. Lanfear, R., Calcott, B., Ho, S. Y. W. & Guindon, S. PartitionFinder: combined selection of partitioning schemes and substitution models for phylogenetic analyses. *Mol. Biol. Evol.* **29**, 1695–1701 (2012).
11. Ronquist, F. et al. MrBayes 3.2: efficient Bayesian phylogenetic inference and model choice across a large model space. *Syst. Biol.* **61**, 539–542 (2012).
12. Huelsenbeck, J. P., Larget, B. & Alfaro, M. E. Bayesian phylogenetic model selection using reversible jump Markov chain Monte Carlo. *Mol. Biol. Evol.* **21**, 1123–1133 (2004).
13. Condamine, F. L., Sperling, F. A. H. & Kergoat, G. J. Global biogeographical pattern of swallowtail diversification demonstrates alternative colonization routes in the Northern and Southern hemispheres. *J. Biogeogr.* **40**, 9–23 (2013).
14. Rambaut, A., Suchard, M. A., Xie, D. & Drummond, A. J. Tracer v1.6, Available from <http://beast.bio.ed.ac.uk/Tracer> (2014).
15. Britton, T., Anderson, C. L., Jacquet, D., Lundqvist, S. & Bremer, K. Estimating divergence times in large phylogenetic trees. *Syst. Biol.* **56**, 741–752 (2007).
16. Drummond, A., Suchard, M. A., Xie, D. & Rambaut, A. Bayesian phylogenetics with BEAUti and the BEAST 1.7. *Mol. Biol. Evol.* **29**, 1969–1973 (2012).
17. Condamine, F. L., Sperling, F. A., Wahlberg, N., Rasplus, J. Y. & Kergoat, G. J. What causes latitudinal gradients in species diversity? Evolutionary processes and ecological constraints on swallowtail biodiversity. *Ecol. Lett.* **15**, 267–277 (2012).
18. Lartillot, N. & Philippe, H. Computing Bayes factors using thermodynamic integration. *Syst. Biol.* **55**, 195–207 (2006).
19. Xie, W., Lewis, P. O., Fan, Y., Kuo, L. & Chen, M. H. Improving marginal likelihood estimation for Bayesian phylogenetic model selection. *Syst. Biol.* **60**, 150–160 (2011).

20. Baele, G. et al. Improving the accuracy of demographic and molecular clock model comparison while accommodating phylogenetic uncertainty. *Mol. Biol. Evol.* **29**, 2157–2167 (2012).
21. Baele, G., Li, W. L. S., Drummond, A. J., Suchard, M. A. & Lemey, P. Accurate model selection of relaxed molecular clocks in Bayesian phylogenetics. *Mol. Biol. Evol.* **30**, 239–243 (2013).
22. Baele, G., Lemey, P. & Vansteelandt, S. Make the most of your samples: Bayes factor estimators for high-dimensional models of sequence evolution. *BMC Bioinf.* **14**, 85 (2013).
23. Kass, R. E. & Raftery, A. E. Bayes factors. *J. Am. Stat. Assoc.* **90**, 773–795 (1995).
24. Matzke, N. J. Model selection in historical biogeography reveals that founder-event speciation is a crucial process in island clades. *Syst. Biol.* **63**, 951–970 (2014).
25. Hall, R. Late Jurassic–Cenozoic reconstructions of the Indonesian region and the Indian Ocean. *Tectonophys.* **570**, 1–41 (2012).
26. Ree, R. H & Smith, S. A. Maximum-likelihood inference of geographic range evolution by dispersal, local extinction, and cladogenesis. *Syst. Biol.* **57**, 4–14 (2008).
27. Ronquist, F. Dispersal-vicariance analysis: A new approach to the quantification of historical biogeography. *Syst. Biol.* **46**, 195–203 (1997).
28. Ronquist, F. & Sanmartín, I. Phylogenetic methods in biogeography. *Ann. Rev. Ecol., Evol., Syst.* **42**, 441–464 (2011).
29. Landis, M., Matzke, N. J., Moore, B. R. & Huelsenbeck, J. P. Bayesian analysis of biogeography when the number of areas is large. *Syst. Biol.* **62**, 789–804 (2013).
30. Maddison, W. P. Confounding asymmetries in evolutionary diversification and character change. *Evolution* **60**, 1743–1746 (2006).

31. Maddison, W. P., Midford, P. E., Otto, S. P. Estimating a binary character's effect on speciation and extinction. *Syst. Biol.* **56**, 701–710 (2007).
32. Goldberg, E. E, Lancaster, L. T & Ree, R. H. Phylogenetic inference of reciprocal effects between geographic range evolution and diversification. *Syst. Biol.* **60**, 451–465 (2011).
33. FitzJohn, R. G. Diversitree: comparative phylogenetic analyses of diversification in R. *Methods Ecol. Evol.* **3**, 1084–1092 (2012).
34. Morlon, H, Parsons, T. L. & Plotkin, J. Reconciling molecular phylogenies with the fossil record. *Proc. Natl Acad. Sci. USA* **108**, 16327-16332 (2011).
35. Zachos, J. C., Dickens, G. R. & Zeebe, R. E. An early Cenozoic perspective on greenhouse warming and carbon-cycle dynamics. *Nature* **451**, 279–283 (2008).
36. Miller, et al. The Phanerozoic record of global sea-level change. *Science* **312**, 1293–1298 (2005).
37. Haq, B. U., Hardenbol, J. & Vail, P. R. Chronology of fluctuating sea levels since the Triassic. *Science* **235**, 1156-1167 (1987).
38. Kominz, et al. Late Cretaceous to Miocene sea-level estimates from the New Jersey and Delaware coastal plain coreholes: an error analysis. *Basin Res.* **20**, 211-226 (2008).

**Table S1. Results of biogeographical analyses.** df, degree of freedom; logL, log-likelihood; d, dispersal rate; e, extinction rate; j, jump dispersal (found event dispersal). Bold and red line indicates the best model of this approach. The  $\Delta\text{AICc}$  compares pair of models (e.g. DEC vs. DEC+J) and the  $\omega\text{AICc}$  compares all the models together to select the best one.

| Models       | df       | logL            | AICc           | $\Delta\text{AICc}$ | $\omega\text{AICc}$ | d             | e               | j             |
|--------------|----------|-----------------|----------------|---------------------|---------------------|---------------|-----------------|---------------|
| DEC          | 2        | -99.47045       | 203.328        | 14.923              | 0.0005              | 0.0109        | 1.01E-02        | 0             |
| <b>DEC+J</b> | <b>3</b> | <b>-90.8027</b> | <b>188.405</b> | <b>0</b>            | <b>0.782</b>        | <b>0.0055</b> | <b>1.00E-12</b> | <b>0.0432</b> |
| DIVA-like    | 2        | -101.54626      | 207.408        | 16.435              | 0.0005              | 0.0143        | 1.36E-02        | 0             |
| DIVA-like+J  | 3        | -92.08654       | 190.973        | 0                   | 0.216               | 0.0062        | 1.00E-12        | 0.0413        |
| BayArea      | 2        | -120.68135      | 245.75         | 44.657              | 0                   | 0.0178        | 1.32E-01        | 0             |
| BayArea+J    | 3        | -97.14662       | 201.093        | 0                   | 0.001               | 0.0043        | 4.13E-03        | 0.0640        |

**Table S2. Results of diversity-dependence diversification analyses.** df, degree of freedom; logL, log-likelihood;  $\lambda$ , speciation rate;  $\mu$ , extinction rate a present; K, estimated carrying capacity. Bold and red lines indicate the best model of this approach for each clade. The  $\Delta\text{AICc}$  and  $\omega\text{AICc}$  are used to compare all the models together to select the best one.

**(a) All birdwing butterflies**

| Clade                        | Species richness                       | Model        | df       | logL           | AICc          | $\Delta\text{AICc}$ | $\omega\text{AICc}$ | $\lambda$     | $\mu$                         | K            |
|------------------------------|----------------------------------------|--------------|----------|----------------|---------------|---------------------|---------------------|---------------|-------------------------------|--------------|
| Birdwings (all three genera) | 34 species sampled out of 38 described | DDL          | 2        | -88.572        | 181.53        | 4.625               | 0.086               | 0.196         | -                             | 257.54       |
|                              |                                        | DDL+E        | 3        | -92.315        | 191.43        | 14.524              | 0                   | 0.1105        | 0                             | Inf          |
|                              |                                        | DDX+E        | 3        | -88.621        | 184.04        | 7.135               | 0.024               | 0.233         | 0.0512                        | Inf          |
|                              |                                        | DD+EL        | 3        | -88.566        | 183.93        | 7.026               | 0.026               | 0.2026        | 0.0024                        | 112.46       |
|                              |                                        | <b>DD+EX</b> | <b>3</b> | <b>-85.053</b> | <b>176.91</b> | <b>0</b>            | <b>0.863</b>        | <b>0.2337</b> | <b><math>\approx 0</math></b> | <b>40.07</b> |

**(b) *Troides***

| Clade          | Species richness                       | Model        | df       | logL           | AICc          | $\Delta\text{AICc}$ | $\omega\text{AICc}$ | $\lambda$     | $\mu$                         | K           |
|----------------|----------------------------------------|--------------|----------|----------------|---------------|---------------------|---------------------|---------------|-------------------------------|-------------|
| <i>Troides</i> | 18 species sampled out of 22 described | DDL          | 2        | -39.501        | 83.802        | 3.024               | 0.167               | 0.4134        | -                             | 29.51       |
|                |                                        | DDL+E        | 3        | -39.496        | 86.707        | 5.929               | 0.039               | 0.4388        | 0.0229                        | 28.06       |
|                |                                        | DDX+E        | 3        | -40.153        | 88.02         | 7.242               | 0.02                | 0.4238        | 0.0023                        | Inf         |
|                |                                        | DD+EL        | 3        | -40.415        | 88.544        | 7.766               | 0.016               | 0.2452        | $\approx 0$                   | Inf         |
|                |                                        | <b>DD+EX</b> | <b>3</b> | <b>-36.532</b> | <b>80.778</b> | <b>0</b>            | <b>0.758</b>        | <b>0.3311</b> | <b><math>\approx 0</math></b> | <b>23.7</b> |

**(c) *Ornithoptera***

| Clade               | Species richness          | Model        | df       | logL           | AICc          | $\Delta$ AICc | $\omega$ AICc | $\lambda$     | $\mu$                         | K            |
|---------------------|---------------------------|--------------|----------|----------------|---------------|---------------|---------------|---------------|-------------------------------|--------------|
| <i>Ornithoptera</i> | all 14 species<br>sampled | DDL          | 2        | -39.311        | 83.712        | 17.37         | 0             | 0.05          | -                             | 580639       |
|                     |                           | DDL+E        | 3        | -30.267        | 68.935        | 2.593         | 0.192         | 0.9917        | 0.1617                        | 12.55        |
|                     |                           | DDX+E        | 3        | -31.074        | 70.548        | 4.206         | 0.085         | 2.7256        | 0.1118                        | 17.42        |
|                     |                           | DD+EL        | 3        | -32.403        | 73.207        | 6.865         | 0.023         | 0.2704        | $\approx 0$                   | 20.82        |
|                     |                           | <b>DD+EX</b> | <b>3</b> | <b>-28.971</b> | <b>66.342</b> | <b>0</b>      | <b>0.7</b>    | <b>0.2693</b> | <b><math>\approx 0</math></b> | <b>14.42</b> |

**Table S3. Results of trait-dependence (GeoSSE) diversification analyses.** df, degree of freedom; logL, log-likelihood; sA/sB, speciation rate for trait Wallacea)/B (Wallacea); sAB, allopatric speciation rate; xA/B, extinction rate for trait A (non-Wallacea)/B (Wallacea); dAB, transition rate between state A and B (and conversely for dBA). Bold and red line indicates the best model of this approach. Confidence intervals are derived from the distribution of maximum likelihood parameter values on a random sample of dated trees (obtained from the BEAST dating analysis). The  $\Delta\text{AICc}$  and  $\omega\text{AICc}$  are used to compare all the models together to select the best one.

| Model                                    | df       | logL                       | AICc                      | $\Delta\text{AICc}$ | $\omega\text{AICc}$ | sA                    | sB                | sAB               | xA                    | xB                | dAB                       | dBA                       |
|------------------------------------------|----------|----------------------------|---------------------------|---------------------|---------------------|-----------------------|-------------------|-------------------|-----------------------|-------------------|---------------------------|---------------------------|
| sA = sB = sAB, xA = xB, dAB = dBA        | 3        | -123.920<br>±0.231         | 254.639<br>±0.462         | 3.234               | 0.074               | 0.1652 ±0.0020        |                   |                   | 0.0709 ±0.0044        |                   | 0.0495 ±0.0011            |                           |
| sA ≠ sB ≠ sAB, xA = xB, dAB = dBA        | 5        | -123.401<br>±0.227         | 258.945<br>±0.455         | 7.540               | 0.009               | 0.1752<br>±0.0032     | 0.1663<br>±0.0022 | 0.2756<br>±0.0112 | 0.0889 ±0.0051        |                   | 0.0549 ±0.0013            |                           |
| sA ≠ sB, sAB = 0, xA = xB, dAB = dBA     | 4        | -125.197<br>±0.273         | 259.773<br>±0.546         | 8.368               | 0.006               | 0.2560<br>±0.0036     | 0.1975<br>±0.0015 | 0                 | 0.2081 ±0.0052        |                   | 0.0658 ±0.0014            |                           |
| sA = sB ≠ sAB, xA = xB, dAB = dBA        | 4        | -123.653<br>±0.226         | 256.685<br>±0.453         | 5.280               | 0.0266              | 0.1559 ±0.0020        |                   | 0.2550<br>±0.0107 | 0.0557 ±0.0041        |                   | 0.0487 ±0.0010            |                           |
| sA = sB ≠ sAB, xA ≠ xB, dAB = dBA        | 5        | -122.229<br>±0.211         | 256.601<br>±0.423         | 5.196               | 0.0277              | 0.1743 ±0.0017        |                   | 0.3344<br>±0.0164 | 0.0865<br>±0.0023     | 0.2321<br>±0.0042 | 0.0828 ±0.0017            |                           |
| sA = sB ≠ sAB, xA = xB, dAB ≠ dBA        | 5        | -120.682<br>±0.196         | 253.508<br>±0.391         | 2.102               | 0.13                | 0.1768 ±0.0023        |                   | 0.3965<br>±0.0138 | 0.1399 ±0.0040        |                   | 0.0212<br>±0.0005         | 0.2458<br>±0.0041         |
| sA = sB = sAB, xA ≠ xB, dAB = dBA        | 4        | -122.519<br>±0.216         | 254.417<br>±0.431         | 3.011               | 0.083               | 0.1860 ±0.0017        |                   |                   | 0.1003<br>±0.0026     | 0.2438<br>±0.0047 | 0.0810 ±0.0014            |                           |
| <b>sA = sB = sAB, xA = xB, dAB ≠ dBA</b> | <b>4</b> | <b>-121.013<br/>±0.200</b> | <b>251.405<br/>±0.401</b> | <b>0</b>            | <b>0.372</b>        | <b>0.2004 ±0.0018</b> |                   |                   | <b>0.1767 ±0.0033</b> |                   | <b>0.0216<br/>±0.0004</b> | <b>0.2625<br/>±0.0042</b> |
| sA ≠ sB ≠ sAB, xA ≠ xB, dAB = dBA        | 6        | -120.895<br>±0.211         | 256.900<br>±0.421         | 5.495               | 0.024               | 0.1186<br>±0.0022     | 0.4150<br>±0.0079 | 0.3179<br>±0.0196 | 0.0702<br>±0.0018     | 0.4868<br>±0.0113 | 0.1237 ±0.0036            |                           |
| sA ≠ sB ≠ sAB, xA = xB, dAB ≠ dBA        | 6        | -119.493<br>±0.196         | 254.096<br>±0.391         | 2.691               | 0.097               | 0.1443<br>±0.0020     | 0.2845<br>±0.0031 | 0.3583<br>±0.0119 | 0.2427 ±0.0046        |                   | 0.0008<br>±0.0003         | 0.3769<br>±0.0068         |
| sA = sB = sAB, xA ≠ xB, dAB ≠ dBA        | 5        | -120.720<br>±0.197         | 253.582<br>±0.393         | 2.177               | 0.125               | 0.2111 ±0.0022        |                   |                   | 0.2301<br>±0.0058     | 0.1750<br>±0.0031 | 0.0083<br>±0.0008         | 0.3234<br>±0.0074         |
| sA ≠ sB ≠ sAB, xA ≠ xB, dAB ≠ dBA        | 7        | -119.181<br>±0.199         | 256.670<br>±0.397         | 5.265               | 0.027               | 0.1184<br>±0.0024     | 0.3711<br>±0.0073 | 0.2796<br>±0.0140 | 0.2037<br>±0.0053     | 0.3603<br>±0.0095 | 0.0172<br>±0.0013         | 0.3227<br>±0.0078         |



**Table S4. Results of palaeo-environmental-dependence (a, temperature and b, sea level) diversification analyses.** df, degree of freedom; logL, log likelihood;  $\lambda$ , speciation rate;  $\alpha$ , rate of variation of the speciation according to the palaeo-environmental variable;  $\mu$ , extinction rate;  $\beta$ , rate of variation of extinction according to the palaeo-environmental variable. Bold and red lines indicate the best model of each approach. Confidence intervals are derived from the distribution of maximum likelihood parameter values on a random sample of dated trees (obtained from the BEAST dating analysis). The  $\Delta\text{AICc}$  and  $\omega\text{AICc}$  are used to compare all the models together to select the best one.

(a)

| Models                                                            | Mode of dependence | df       | logL                                            | AICc                                            | $\Delta\text{AICc}$ | $\omega\text{AICc}$ | $\lambda$                                       | $\alpha$                | $\mu$                                           | $\beta$                                         |
|-------------------------------------------------------------------|--------------------|----------|-------------------------------------------------|-------------------------------------------------|---------------------|---------------------|-------------------------------------------------|-------------------------|-------------------------------------------------|-------------------------------------------------|
| $\lambda\text{Temp. and } \mu \text{ constant}$                   | exponential        | 3        | -92.338<br>$\pm 0.191$                          | 191.476<br>$\pm 0.382$                          | 2.574               | 0.175               | 0.2295<br>$\pm 0.0024$                          | -0.0632<br>$\pm 0.0017$ | 0.0293<br>$\pm 0.0018$                          | -                                               |
| <b><math>\lambda \text{ constant and } \mu\text{Temp.}</math></b> | <b>exponential</b> | <b>3</b> | <b>-91.051</b><br><b><math>\pm 0.192</math></b> | <b>188.902</b><br><b><math>\pm 0.383</math></b> | <b>0</b>            | <b>0.633</b>        | <b>0.1846</b><br><b><math>\pm 0.0013</math></b> | <b>-</b>                | <b>0.0013</b><br><b><math>\pm 0.0003</math></b> | <b>0.9110</b><br><b><math>\pm 0.0199</math></b> |
| $\lambda\text{Temp. and } \mu\text{Temp.}$                        | exponential        | 4        | -90.953<br>$\pm 0.193$                          | 191.286<br>$\pm 0.387$                          | 2.385               | 0.192               | 0.1477<br>$\pm 0.0028$                          | 0.1089<br>$\pm 0.0088$  | 0.0178<br>$\pm 0.0019$                          | 0.5539<br>$\pm 0.0170$                          |

(b)

| Models                                                               | Mode of dependence | df       | logL                                            | AICc                                            | $\Delta\text{AICc}$ | $\omega\text{AICc}$ | $\lambda$                                       | $\alpha$               | $\mu$                                           | $\beta$                                         |
|----------------------------------------------------------------------|--------------------|----------|-------------------------------------------------|-------------------------------------------------|---------------------|---------------------|-------------------------------------------------|------------------------|-------------------------------------------------|-------------------------------------------------|
| $\lambda\text{SeaLevel and } \mu \text{ constant}$                   | exponential        | 3        | -92.356<br>$\pm 0.172$                          | 191.511<br>$\pm 0.343$                          | 2.422               | 0.177               | 0.2610<br>$\pm 0.0040$                          | 0.0041<br>$\pm 0.0003$ | 0.1501<br>$\pm 0.0044$                          | -                                               |
| <b><math>\lambda \text{ constant and } \mu\text{SeaLevel}</math></b> | <b>exponential</b> | <b>3</b> | <b>-91.145</b><br><b><math>\pm 0.191</math></b> | <b>189.089</b><br><b><math>\pm 0.383</math></b> | <b>0</b>            | <b>0.594</b>        | <b>0.1853</b><br><b><math>\pm 0.0011</math></b> | <b>-</b>               | <b>0.0691</b><br><b><math>\pm 0.0031</math></b> | <b>0.1652</b><br><b><math>\pm 0.0061</math></b> |
| $\lambda\text{SeaLevel and } \mu\text{SeaLevel}$                     | exponential        | 4        | -90.810<br>$\pm 0.192$                          | 190.999<br>$\pm 0.384$                          | 1.909               | 0.229               | 0.2984<br>$\pm 0.0155$                          | 0.0085<br>$\pm 0.0007$ | 0.2108<br>$\pm 0.0182$                          | 0.1201<br>$\pm 0.0054$                          |

**Table S5. Taxon sampling and GenBank accession numbers.** MG, morphological group *sensu* Haugun and Low<sup>1</sup>

| Sample ID   | MG                                  | Species                                     | Author                 | Country           | Locality                    | COI      | ND5 | 16S | Wg  |
|-------------|-------------------------------------|---------------------------------------------|------------------------|-------------------|-----------------------------|----------|-----|-----|-----|
| Not sampled | haliphron species-group             | <i>Troides darsius</i>                      | (Gray 1853)            | Sri Lanka         | -                           | -        | -   | -   | -   |
| FLC_00257   |                                     | <i>Troides vandepolli vandepolli</i>        | (Snellen 1890)         | Indonesia         | West Java, Mt. Wayang       | SEQ      | SEQ | SEQ | SEQ |
| FLC_00258   |                                     | <i>Troides vandepolli vandepolli</i>        | (Snellen 1890)         | Indonesia         | West Java, Mt. Wayang       | SEQ      | SEQ | SEQ | SEQ |
| FLC_00259   |                                     | <i>Troides criton criton (f. androgyna)</i> | (Felder & Felder 1860) | Indonesia         | Halmahera Island            | SEQ      | SEQ | SEQ | SEQ |
| FLC_00260   |                                     | <i>Troides criton critonides</i>            | (Fruhstorfer 1903)     | Indonesia         | North Moluccas, Obi Island  | SEQ      | SEQ | SEQ | SEQ |
| FLC_00261   |                                     | <i>Troides criton criton</i>                | (Felder & Felder 1860) | Indonesia         | Moluccas, Halmahera Island  | SEQ      | SEQ | SEQ | SEQ |
| FLC_00262   |                                     | <i>Troides criton criton</i>                | (Felder & Felder 1860) | Indonesia         | Moluccas, Halmahera Island  | SEQ      | SEQ | SEQ | SEQ |
| EC-063      |                                     | <i>Troides criton criton</i>                | (Felder & Felder 1860) | Indonesia         | -                           | EF514410 | -   | -   | -   |
| EC-071      |                                     | <i>Troides criton critonides</i>            | (Fruhstorfer 1903)     | Indonesia         | -                           | EF514403 | -   | -   | -   |
| EC-084      |                                     | <i>Troides riedeli</i>                      | (Kirsch 1885)          | Indonesia         | -                           | EF514423 | -   | -   | -   |
| EC-085      |                                     | <i>Troides riedeli</i>                      | (Kirsch 1885)          | Indonesia         | -                           | EF514419 | -   | -   | -   |
| FLC_00264   |                                     | <i>Troides plato</i>                        | (Wallace 1865)         | Indonesia         | Timor                       | SEQ      | SEQ | SEQ | SEQ |
| FLC_00265   |                                     | <i>Troides haliphron haliphron</i>          | (Boisduval 1836)       | Indonesia         | South Sulawesi, Bantimurung | SEQ      | SEQ | SEQ | SEQ |
| FLC_00266   |                                     | <i>Troides haliphron haliphron</i>          | (Boisduval 1836)       | Indonesia         | South Sulawesi, Bantimurung | SEQ      | SEQ | SEQ | SEQ |
| FLC_00267   |                                     | <i>Troides haliphron purabu</i>             | Kobayashi 1987         | Indonesia         | Batuatas Island             | SEQ      | SEQ | SEQ | SEQ |
| FLC_00268   |                                     | <i>Troides haliphron purabu</i>             | Kobayashi 1987         | Indonesia         | Batuatas Island             | SEQ      | SEQ | SEQ | SEQ |
| FLC_00269   |                                     | <i>Troides haliphron socrates</i>           | (Staudinger 1891)      | Indonesia         | Wetar Island                | SEQ      | SEQ | SEQ | SEQ |
| FLC_00270   |                                     | <i>Troides haliphron socrates</i>           | (Staudinger 1891)      | Indonesia         | Wetar Island                | SEQ      | SEQ | SEQ | SEQ |
| FLC_00271   |                                     | <i>Troides haliphron pallens</i>            | (Oberthür 1897)        | Indonesia         | Selayar, Z-Sulawesi         | SEQ      | SEQ | SEQ | SEQ |
| FLC_00272   |                                     | <i>Troides haliphron pallens</i>            | (Oberthür 1897)        | Indonesia         | Selayar, Z-Sulawesi         | SEQ      | SEQ | SEQ | SEQ |
| FLC_00273   | <i>Troides haliphron celebensis</i> | (Wallace 1865)                              | Indonesia              | Maros, Z-Sulawesi | SEQ                         | SEQ      | SEQ | SEQ |     |

|           |                                 |                                       |                              |                 |                             |                  |          |     |     |
|-----------|---------------------------------|---------------------------------------|------------------------------|-----------------|-----------------------------|------------------|----------|-----|-----|
| EC-081    |                                 | <i>Troides haliphron haliphron</i>    | (Boisduval 1836)             | Indonesia       | -                           | EF514425         | -        | -   | -   |
| EC-082    |                                 | <i>Troides haliphron naias</i>        | (Doherty 1891)               | Indonesia       | -                           | EF514415         | -        | -   | -   |
| EC-083    |                                 | <i>Troides haliphron naias</i>        | (Doherty 1891)               | Indonesia       | -                           | EF514404         | -        | -   | -   |
| 38        |                                 | <i>Troides haliphron haliphron</i>    | (Boisduval 1836)             | Indonesia       | South Sulawesi, Bantimurung | -                | AB044649 | -   | -   |
| FLC_00274 |                                 | <i>Troides staudingeri heptanonus</i> | (Fruhstorfer 1913)           | Indonesia       | Moluccas, Damar Island      | SEQ              | SEQ      | SEQ | SEQ |
| FLC_00275 |                                 | <i>Troides staudingeri heptanonus</i> | (Fruhstorfer 1913)           | Indonesia       | Moluccas, Damar Island      | SEQ              | SEQ      | SEQ | SEQ |
| FLC_00276 |                                 | <i>Troides staudingeri iris</i>       | (Röber 1888)                 | Indonesia       | Moluccas, Moa Island        | SEQ              | SEQ      | SEQ | SEQ |
| FLC_00277 |                                 | <i>Troides staudingeri iris</i>       | (Röber 1888)                 | Indonesia       | Moluccas, Moa Island        | SEQ              | SEQ      | SEQ | SEQ |
| FLC_00278 |                                 | <i>Troides staudingeri iris</i>       | (Röber 1888)                 | Indonesia       | Moluccas, Moa Island        | SEQ              | SEQ      | SEQ | SEQ |
| 877       |                                 | <i>Troides staudingeri iris</i>       | (Röber 1888)                 | Indonesia       | Moluccas, Lakor Island      | -                | AB044651 | -   | -   |
| EC-072    |                                 | <i>Troides staudingeri ssp.</i>       | (Röber 1888)                 | Indonesia       | -                           | EF514417         | -        | -   | -   |
| EC-074    |                                 | <i>Troides staudingeri ssp.</i>       | (Röber 1888)                 | Indonesia       | -                           | EF514427         | -        | -   | -   |
| EC-075    |                                 | <i>Troides staudingeri ssp.</i>       | (Röber 1888)                 | Indonesia       | -                           | EF514426         | -        | -   | -   |
| EC-076    |                                 | <i>Troides staudingeri ssp.</i>       | (Röber 1888)                 | Indonesia       | -                           | EF514449         | -        | -   | -   |
| FLC_00280 |                                 | <b>helena species-group</b>           | <i>Troides helena helena</i> | (Linnaeus 1758) | Indonesia                   | Butar, East java | SEQ      | SEQ | SEQ |
| FLC_00281 | <i>Troides helena helena</i>    |                                       | (Linnaeus 1758)              | Indonesia       | Butar, East java            | SEQ              | SEQ      | SEQ | SEQ |
| FLC_00282 | <i>Troides helena helena</i>    |                                       | (Linnaeus 1758)              | Indonesia       | West Java                   | SEQ              | SEQ      | SEQ | SEQ |
| FLC_00283 | <i>Troides helena helena</i>    |                                       | (Linnaeus 1758)              | Indonesia       | West Java                   | SEQ              | SEQ      | SEQ | SEQ |
| 455       | <i>Troides helena helena</i>    |                                       | (Linnaeus 1758)              | Indonesia       | Bali Island                 | -                | AB027594 | -   | -   |
| TypeT2    | <i>Troides helena helena</i>    |                                       | (Linnaeus 1758)              | Indonesia       | Bali Island                 | -                | AB084430 | -   | -   |
| FLC_00284 | <i>Troides helena antileuca</i> |                                       | (Rothschild 1908)            | Indonesia       | Kangean Island              | SEQ              | SEQ      | SEQ | SEQ |
| FLC_00285 | <i>Troides helena antileuca</i> |                                       | (Rothschild 1908)            | Indonesia       | Kangean Island              | SEQ              | SEQ      | SEQ | SEQ |
| FLC_00286 | <i>Troides helena antileuca</i> |                                       | (Rothschild 1908)            | Indonesia       | Kangean Island              | SEQ              | SEQ      | SEQ | SEQ |

|           |                                                  |                        |            |                                                   |          |     |          |          |     |
|-----------|--------------------------------------------------|------------------------|------------|---------------------------------------------------|----------|-----|----------|----------|-----|
| FLC_00287 | <i>Troides helena mannus</i>                     | (Fruhstorfer 1908)     | Indonesia  | Bali Island                                       |          | SEQ | SEQ      | SEQ      | SEQ |
| FLC_00288 | <i>Troides helena mannus</i>                     | (Fruhstorfer 1908)     | Indonesia  | Bali Island                                       |          | SEQ | SEQ      | SEQ      | SEQ |
| FLC_00289 | <i>Troides helena mannus</i>                     | (Fruhstorfer 1908)     | Indonesia  | Bali Island                                       |          | SEQ | SEQ      | SEQ      | SEQ |
| FLC_00290 | <i>Troides helena hephaestus</i>                 | (Felder 1865)          | Indonesia  | South Sulawesi, Bantimurung                       |          | SEQ | SEQ      | SEQ      | SEQ |
| FLC_00291 | <i>Troides helena hephaestus</i>                 | (Felder 1865)          | Indonesia  | South Sulawesi, Bantimurung                       |          | SEQ | SEQ      | SEQ      | SEQ |
| FLC_00292 | <i>Troides helena spp.</i>                       | (Linnaeus 1758)        | Indonesia  | Bali Island                                       |          | SEQ | SEQ      | SEQ      | SEQ |
| FLC_00293 | <i>Troides helena spp.</i>                       | (Linnaeus 1758)        | Indonesia  | Bali Island                                       |          | SEQ | SEQ      | SEQ      | SEQ |
| FLC_00294 | <i>Troides helena spp.</i>                       | (Linnaeus 1758)        | Malaysia   | Cameron Highlands                                 |          | SEQ | SEQ      | SEQ      | SEQ |
| FLC_00295 | <i>Troides helena cerberus</i>                   | (Felder & Felder 1865) | Indonesia  | -                                                 |          | SEQ | SEQ      | SEQ      | SEQ |
| FS-b-974  | <i>Troides helena cerberus</i>                   | (Felder & Felder 1865) | Malaysia   | -                                                 | AF170878 | -   | DQ351084 | AY569047 |     |
| JJW0011   | <i>Troides helena cerberus</i>                   | (Felder & Felder 1865) | Malaysia   | Selangor, Batu, Gombak, PPLUM                     | KF226654 | -   | -        | -        |     |
| JJW0013   | <i>Troides helena cerberus</i>                   | (Felder & Felder 1865) | Malaysia   | Negeri Sembilan, Jelebu, Hutan Simpan Kenaboi, N9 | KF226655 | -   | -        | -        |     |
| EC-058    | <i>Troides helena cerberus</i>                   | (Felder & Felder 1865) | India      | -                                                 | EF514456 | -   | -        | -        |     |
| EC-079    | <i>Troides helena cerberus</i>                   | (Felder & Felder 1865) | Indonesia  | -                                                 | EF514446 | -   | -        | -        |     |
| FLC_00296 | <i>Troides helena sagittatus</i>                 | (Fruhstorfer 1896)     | Indonesia  | Lombok Island                                     |          | SEQ | SEQ      | SEQ      | SEQ |
| FLC_00297 | <i>Troides oblongomaculatus aff. papuensis</i>   | (Wallace 1865)         | Indonesia  | Talaud Island                                     |          | SEQ | SEQ      | SEQ      | SEQ |
| FLC_00298 | <i>Troides oblongomaculatus aff. papuensis</i>   | (Wallace 1865)         | Indonesia  | Talaud Island                                     |          | SEQ | SEQ      | SEQ      | SEQ |
| FLC_00299 | <i>Troides oblongomaculatus papuensis</i>        | (Wallace 1865)         | New Guinea | Manki Range, Aseki Subdistrict, Morobe Province   |          | SEQ | SEQ      | SEQ      | SEQ |
| FLC_00300 | <i>Troides oblongomaculatus papuensis</i>        | (Wallace 1865)         | New Guinea | Watut, Bulolo, Aseki Subdistrict, Morobe Province |          | SEQ | SEQ      | SEQ      | SEQ |
| FLC_00301 | <i>Troides oblongomaculatus papuensis</i>        | (Wallace 1865)         | New Guinea | Watut, Bulolo, Aseki Subdistrict, Morobe Province |          | SEQ | SEQ      | SEQ      | SEQ |
| FLC_00302 | <i>Troides oblongomaculatus oblongomaculatus</i> | (Goeze 1779)           | Indonesia  | Binongko Island (East Sulawesi)                   |          | SEQ | SEQ      | SEQ      | SEQ |
| FLC_00303 | <i>Troides oblongomaculatus oblongomaculatus</i> | (Goeze 1779)           | Indonesia  | Binongko Island (East Sulawesi)                   |          | SEQ | SEQ      | SEQ      | SEQ |
| FLC_00304 | <i>Troides oblongomaculatus oblongomaculatus</i> | (Goeze 1779)           | Indonesia  | Moluccas, Seram Island                            |          | SEQ | SEQ      | SEQ      | SEQ |

|                    |                          |                                                  |                          |                       |                                            |          |          |     |     |
|--------------------|--------------------------|--------------------------------------------------|--------------------------|-----------------------|--------------------------------------------|----------|----------|-----|-----|
| FLC_00305          |                          | <i>Troides oblongomaculatus oblongomaculatus</i> | (Goeze 1779)             | Indonesia             | Moluccas, Seram Island                     | SEQ      | SEQ      | SEQ | SEQ |
| EC-059             |                          | <i>Troides oblongomaculatus bandensis</i>        | (Pagenstecher 1904)      | Indonesia             | Moluccas, Banda Island                     | EF514451 | -        | -   | -   |
| EC-060             |                          | <i>Troides oblongomaculatus bandensis</i>        | (Pagenstecher 1904)      | Indonesia             | Moluccas, Banda Island                     | EF514450 | -        | -   | -   |
| EC-061             |                          | <i>Troides oblongomaculatus oblongomaculatus</i> | (Goeze 1779)             | Indonesia             | -                                          | EF514448 | -        | -   | -   |
| EC-062             |                          | <i>Troides oblongomaculatus bandensis</i>        | (Pagenstecher 1904)      | Indonesia             | Moluccas, Banda Island                     | EF514453 | -        | -   | -   |
| EC-077             | aeacus species-group     | <i>Troides aeacus aeacus</i>                     | (Felder & Felder 1860)   | India                 | -                                          | EF514455 | -        | -   | -   |
| FLC_00306          |                          | <i>Troides aeacus szechwanus</i>                 | Okano & Okano 1983       | China                 | Ya'an area, Sichuan                        | SEQ      | SEQ      | SEQ | SEQ |
| Pa428              |                          | <i>Troides aeacus formosanus</i>                 | (Rothschild 1899)        | Taiwan                | Zanhua                                     | AB576585 | -        | -   | -   |
| FLC_00307          |                          | <i>Troides magellanus magellanus</i>             | (Felder & Felder 1862)   | Philippines           | Gasán, Marindugue, Fillippijnen            | SEQ      | SEQ      | SEQ | SEQ |
| FLC_00308          |                          | <i>Troides magellanus apoensis</i>               | (Felder & Felder 1862)   | Philippines           | Bohol, Fillippijnen                        | SEQ      | SEQ      | SEQ | SEQ |
| <b>Not sampled</b> |                          | <b><i>Troides minos</i></b>                      | <b>(Cramer 1779)</b>     | <b>India</b>          | <b>Western Ghats, South India</b>          | -        | -        | -   | -   |
| FLC_00310          |                          | <i>Troides rhadamantus</i>                       | (Lucas 1835)             | Philippines           | -                                          | SEQ      | SEQ      | SEQ | SEQ |
| FLC_00311          |                          | <i>Troides rhadamantus</i>                       | (Lucas 1835)             | Philippines           | -                                          | SEQ      | SEQ      | SEQ | SEQ |
| <b>Not sampled</b> |                          | <b><i>Troides dohertyi</i></b>                   | <b>(Rippon 1893)</b>     | <b>Indonesia</b>      | <b>Talau Island</b>                        | -        | -        | -   | -   |
| <b>Not sampled</b> |                          | <b><i>Troides plateni</i></b>                    | <b>(Staudinger 1888)</b> | <b>Philippines</b>    | <b>Palawan, Balabac, Dumarán, Busuanga</b> | -        | -        | -   | -   |
| EC-002             |                          | <i>Troides prattorum</i>                         | (Joicey & Talbot 1922)   | Indonesia             | Moluccas, Buru Island                      | EF514421 | -        | -   | -   |
| 510                | <i>Troides prattorum</i> | (Joicey & Talbot 1922)                           | Indonesia                | Moluccas, Buru Island | -                                          | AB044650 | -        | -   |     |
| FLC_00313          | amphrysus species-group  | <i>Troides amphrysus joane</i>                   | Parrott 1991             | Indonesia             | Bali Island                                | SEQ      | SEQ      | SEQ | SEQ |
| FLC_00314          |                          | <i>Troides amphrysus amphrysus</i>               | (Cramer 1779)            | Indonesia             | Java                                       | SEQ      | SEQ      | SEQ | SEQ |
| FLC_00315          |                          | <i>Troides amphrysus amphrysus</i>               | (Cramer 1779)            | Indonesia             | Java                                       | SEQ      | SEQ      | SEQ | SEQ |
| 317                |                          | <i>Troides amphrysus amphrysus</i>               | (Cramer 1779)            | Indonesia             | Java                                       | -        | AB027593 | -   | -   |
| TypeT3             |                          | <i>Troides amphrysus eutydemus</i>               | (Fruhstorfer 1913)       | Indonesia             | Sumatra                                    | -        | AB084431 | -   | -   |
| JJW0012            |                          | <i>Troides amphrysus ruficolis</i>               | (Butler 1879)            | Malaysia              | Negeri Sembilan, Berembun Forest Reserve   | KF226653 | -        | -   | -   |

|           |                   |                                      |                   |           |                                |          |          |     |     |
|-----------|-------------------|--------------------------------------|-------------------|-----------|--------------------------------|----------|----------|-----|-----|
| EC-046    |                   | <i>Troides amphrysus ssp.</i>        | (Cramer 1779)     | Indonesia | -                              | EF514412 | -        | -   | -   |
| EC-005    |                   | <i>Troides andromache</i>            | (Staudinger 1892) | Malaysia  | Borneo                         | EF514437 | -        | -   | -   |
| EC-006    |                   | <i>Troides andromache</i>            | (Staudinger 1892) | Malaysia  | Borneo                         | EF514440 | -        | -   | -   |
| FLC_00317 |                   | <i>Troides cuneifera cuneifera</i>   | (Oberthür 1879)   | Indonesia | Java, Mt. Argopuro             | SEQ      | SEQ      | SEQ | SEQ |
| FLC_00318 |                   | <i>Troides cuneifera cuneifera</i>   | (Oberthür 1879)   | Indonesia | Java, Mt. Argopuro             | SEQ      | SEQ      | SEQ | SEQ |
| FLC_00319 |                   | <i>Troides cuneifera cuneifera</i>   | (Oberthür 1879)   | Indonesia | Java, Mt. Wayana               | SEQ      | SEQ      | SEQ | SEQ |
| FLC_00320 |                   | <i>Troides cuneifera cuneifera</i>   | (Oberthür 1879)   | Indonesia | Java, Mt. Wayana               | SEQ      | SEQ      | SEQ | SEQ |
| FLC_00321 |                   | <i>Troides cuneifera sumatranus</i>  | (Hagen 1894)      | Indonesia | North Sumatra, Berastagi       | SEQ      | SEQ      | SEQ | SEQ |
| FLC_00322 |                   | <i>Troides cuneifera sumatranus</i>  | (Hagen 1894)      | Indonesia | North Sumatra, Berastagi       | SEQ      | SEQ      | SEQ | SEQ |
| EC-038    |                   | <i>Troides cuneifera ssp.</i>        | (Oberthür 1879)   | Indonesia | -                              | EF514433 | -        | -   | -   |
| EC-044    |                   | <i>Troides miranda neomiranda</i>    | (Butler 1869)     | Malaysia  | Borneo                         | EF514407 | -        | -   | -   |
| FLC_00324 |                   | <i>Troides hypolitus cellularis</i>  | Rothschild 1895   | Indonesia | South Sulawesi, Bantimurung    | SEQ      | SEQ      | SEQ | SEQ |
| FLC_00325 |                   | <i>Troides hypolitus cellularis</i>  | Rothschild 1895   | Indonesia | South Sulawesi, Bantimurung    | SEQ      | SEQ      | SEQ | SEQ |
| FLC_00326 |                   | <i>Troides hypolitus antiopa</i>     | Rothschild 1908   | Indonesia | North Moluccas, Morotai Island | SEQ      | SEQ      | SEQ | SEQ |
| FLC_00327 |                   | <i>Troides hypolitus antiopa</i>     | Rothschild 1908   | Indonesia | North Moluccas, Morotai Island | SEQ      | SEQ      | SEQ | SEQ |
| FLC_00328 |                   | <i>Troides hypolitus sangirensis</i> | Morisode 2005     | Indonesia | North Sulawesi, Sangir Island  | SEQ      | SEQ      | SEQ | SEQ |
| FLC_00329 |                   | <i>Troides hypolitus sangirensis</i> | Morisode 2005     | Indonesia | North Sulawesi, Sangir Island  | SEQ      | SEQ      | SEQ | SEQ |
| 882       | Subgenus Ripponia | <i>Troides hypolitus ssp.</i>        | (Cramer 1775)     | Indonesia | -                              | -        | AB027592 | -   | -   |
| TypeT1    |                   | <i>Troides hypolitus hypolitus</i>   | (Cramer 1775)     | Indonesia | Moluccas, Halmahera Island     | -        | AB084429 | -   | -   |
| EC-056    |                   | <i>Troides hypolitus ssp.</i>        | (Cramer 1775)     | Indonesia | -                              | EF514416 | -        | -   | -   |
| EC-057    |                   | <i>Troides hypolitus ssp.</i>        | (Cramer 1775)     | Indonesia | -                              | EF514441 | -        | -   | -   |
| EC-009    |                   | <i>Ornithoptera aesacus</i>          | Ney 1903          | Indonesia | Moluccas, Obi Island           | EF514431 | -        | -   | -   |
| EC-015    |                   | <i>Ornithoptera aesacus</i>          | Ney 1903          | Indonesia | Moluccas, Obi Island           | EF514422 | -        | -   | -   |

|              |  |                                         |                         |            |                                     |          |          |          |          |
|--------------|--|-----------------------------------------|-------------------------|------------|-------------------------------------|----------|----------|----------|----------|
| 114          |  | <i>Ornithoptera aesacus</i>             | Ney 1903                | Indonesia  | Moluccas, Obi Island                | -        | AB044655 | -        | -        |
| FLC_00341    |  | <i>Ornithoptera priamus urvillenaus</i> | (Guérin-Méneville 1830) | Solomon    | -                                   | SEQ      | SEQ      | SEQ      | SEQ      |
| FLC_00342    |  | <i>Ornithoptera priamus urvillenaus</i> | (Guérin-Méneville 1830) | Solomon    | -                                   | SEQ      | SEQ      | SEQ      | SEQ      |
| 371          |  | <i>Ornithoptera priamus urvillenaus</i> | (Guérin-Méneville 1830) | Solomon    | Guadalcanal                         | .        | AB044657 | -        | -        |
| 373          |  | <i>Ornithoptera priamus urvillenaus</i> | (Guérin-Méneville 1830) | Solomon    | Malaita                             | -        | AB027597 | -        | -        |
| TypeO10      |  | <i>Ornithoptera priamus urvillenaus</i> | (Guérin-Méneville 1830) | Solomon    | Bougainville                        | -        | AB084441 | -        | -        |
| FLC_00343    |  | <i>Ornithoptera priamus poseidon</i>    | (Doubleday 1847)        | New Guinea | Irian Jaya, Mt. Arfak               | SEQ      | SEQ      | SEQ      | SEQ      |
| FLC_00344    |  | <i>Ornithoptera priamus poseidon</i>    | (Doubleday 1847)        | New Guinea | Irian Jaya, Mt. Arfak               | SEQ      | SEQ      | SEQ      | SEQ      |
| 351          |  | <i>Ornithoptera priamus poseidon</i>    | (Doubleday 1847)        | New Guinea | Irian Jaya, Timika                  | -        | AB044656 | -        | -        |
| EC-010       |  | <i>Ornithoptera priamus poseidon</i>    | (Doubleday 1847)        | New Guinea | -                                   | EF514420 | -        | -        | -        |
| EC-014       |  | <i>Ornithoptera priamus ssp.</i>        | (Linnaeus 1758)         | New Guinea | -                                   | EF514424 | -        | -        | -        |
| FS-b-3776    |  | <i>Ornithoptera priamus ssp.</i>        | (Linnaeus 1758)         | New Guinea | -                                   | -        | -        | GQ268350 | GQ268414 |
| W122         |  | <i>Ornithoptera priamus poseidon</i>    | (Linnaeus 1758)         | New Guinea | Bulolo                              | -        | -        | AM283052 | -        |
| 11ANIC-07882 |  | <i>Ornithoptera priamus macalpinei</i>  | Moulds 1974             | Australia  | Queensland                          | KF397018 | -        | -        | -        |
| 11ANIC-07883 |  | <i>Ornithoptera priamus macalpinei</i>  | Moulds 1974             | Australia  | Queensland                          | KF405508 | -        | -        | -        |
| 11ANIC-07981 |  | <i>Ornithoptera euphorion</i>           | (Gray 1853)             | Australia  | Queensland, Bingup Beach near Tully | KF405060 | -        | -        | -        |
| RE-02-A033   |  | <i>Ornithoptera euphorion</i>           | (Gray 1853)             | Australia  | Queensland, Herberton               | AY919291 | -        | -        | -        |
| 11ANIC-07984 |  | <i>Ornithoptera richmondia</i>          | (Gray 1853)             | Australia  | New South Wales, East Ballina       | KF399304 | -        | -        | -        |
| 11ANIC-07985 |  | <i>Ornithoptera richmondia</i>          | (Gray 1853)             | Australia  | New South Wales, East Ballina       | KF405859 | -        | -        | -        |
| FLC_00333    |  | <i>Ornithoptera croesus lydius</i>      | (Felder & Felder 1865)  | Indonesia  | Mollucas, Halmahera Island          | SEQ      | SEQ      | SEQ      | SEQ      |
| FLC_00334    |  | <i>Ornithoptera croesus lydius</i>      | (Felder & Felder 1865)  | Indonesia  | Mollucas, Halmahera Island          | SEQ      | SEQ      | SEQ      | SEQ      |
| FLC_00335    |  | <i>Ornithoptera croesus lydius</i>      | (Felder & Felder 1865)  | Indonesia  | Mollucas, Halmahera Island          | SEQ      | SEQ      | SEQ      | SEQ      |
| FLC_00336    |  | <i>Ornithoptera croesus lydius</i>      | (Felder & Felder 1865)  | Indonesia  | Mollucas, Halmahera Island          | SEQ      | SEQ      | SEQ      | SEQ      |

|           |  |                                                |                        |            |                              |          |          |     |     |
|-----------|--|------------------------------------------------|------------------------|------------|------------------------------|----------|----------|-----|-----|
| TypeO7    |  | <i>Ornithoptera croesus ssp.</i>               | (Wallace 1859)         | Indonesia  | Mollucas, Halmahera Island   | -        | AB084438 | -   | -   |
| 112       |  | <i>Ornithoptera croesus ssp.</i>               | (Wallace 1859)         | Indonesia  | Mollucas, Halmahera Island   | -        | AB027595 | -   | -   |
| 614       |  | <i>Ornithoptera croesus ssp.</i>               | (Wallace 1859)         | Indonesia  | North Mollucas, Bacan Island | -        | AB044654 | -   | -   |
| EC-029    |  | <i>Ornithoptera croesus ssp.</i>               | (Wallace 1859)         | Indonesia  | North Mollucas               | EF514434 | -        | -   | -   |
| EC-030    |  | <i>Ornithoptera croesus ssp.</i>               | (Wallace 1859)         | Indonesia  | North Mollucas               | EF514408 | -        | -   | -   |
| EC-032    |  | <i>Ornithoptera croesus ssp.</i>               | (Wallace 1859)         | Indonesia  | North Mollucas               | EF514428 | -        | -   | -   |
| EC-033    |  | <i>Ornithoptera croesus ssp.</i>               | (Wallace 1859)         | Indonesia  | North Mollucas               | EF514432 | -        | -   | -   |
| EC-035    |  | <i>Ornithoptera croesus ssp.</i>               | (Wallace 1859)         | Indonesia  | North Mollucas               | EF514409 | -        | -   | -   |
| FLC_00337 |  | <i>Ornithoptera goliath samson</i>             | (Niepelt 1913)         | Indonesia  | Irian Jaya, Mt. Arfak        | -        | SEQ      | SEQ | SEQ |
| FLC_00338 |  | <i>Ornithoptera goliath samson</i>             | (Niepelt 1913)         | Indonesia  | Irian Jaya, Mt. Arfak        | -        | SEQ      | SEQ | SEQ |
| FLC_00358 |  | <i>Ornithoptera goliath supremus</i>           | Röber 1896             | New Guinea | Aseki, Morobe Province       | SEQ      | SEQ      | SEQ | SEQ |
| FLC_00359 |  | <i>Ornithoptera goliath supremus</i>           | Röber 1896             | New Guinea | Aseki, Morobe Province       | SEQ      | SEQ      | SEQ | SEQ |
| EC-047    |  | <i>Ornithoptera goliath ssp.</i>               | Oberthür 1888          | New Guinea | -                            | EF514414 | -        | -   | -   |
| EC-049    |  | <i>Ornithoptera goliath ssp.</i>               | Oberthür 1888          | New Guinea | -                            | EF514418 | -        | -   | -   |
| EC-087    |  | <i>Ornithoptera goliath ssp.</i>               | Oberthür 1888          | New Guinea | -                            | EF514447 | -        | -   | -   |
| TypeO2    |  | <i>Ornithoptera goliath ssp.</i>               | Oberthür 1888          | New Guinea | Irian Jaya                   | -        | AB084433 | -   | -   |
| 110       |  | <i>Ornithoptera goliath ssp.</i>               | Oberthür 1888          | Indonesia  | -                            | -        | AB027600 | -   | -   |
| 398       |  | <i>Ornithoptera goliath procus</i>             | (Rothschild 1914)      | Indonesia  | Moluccas, Seram Island       | -        | AB027599 | -   | -   |
| TypeO6    |  | <i>Ornithoptera meridionalis meridionalis</i>  | (Rothschild 1897)      | New Guinea | -                            | -        | AB084437 | -   | -   |
| 193       |  | <i>Ornithoptera meridionalis tarungarensis</i> | (Joicey & Talbot 1927) | New Guinea | Irian Jaya, Timika           | -        | AB044653 | -   | -   |
| EC-031    |  | <i>Ornithoptera paradisea</i>                  | (Staudinger 1893)      | New Guinea | -                            | EF514452 | -        | -   | -   |
| EC-037    |  | <i>Ornithoptera paradisea</i>                  | (Staudinger 1893)      | New Guinea | -                            | EF514461 | -        | -   | -   |
| 196       |  | <i>Ornithoptera paradisea</i>                  | (Staudinger 1893)      | New Guinea | -                            | -        | AB027603 | -   | -   |



|           |                                         |                        |            |                                     |          |          |     |     |
|-----------|-----------------------------------------|------------------------|------------|-------------------------------------|----------|----------|-----|-----|
| TypeO4    | <i>Ornithoptera paradisea</i>           | (Staudinger 1893)      | New Guinea | Irian Jaya                          | -        | AB084435 | -   | -   |
| -         | <i>Ornithoptera arfakensis</i>          | (Joicey & Noakes 1916) | New Guinea | Irian Jaya, Mt. Arfak               | -        | AB044659 | -   | -   |
| EC-053    | <i>Ornithoptera chimaera ssp.</i>       | (Rothschild 1904)      | New Guinea | -                                   | EF514411 | -        | -   | -   |
| EC-055    | <i>Ornithoptera chimaera ssp.</i>       | (Rothschild 1904)      | New Guinea | -                                   | EF514445 | -        | -   | -   |
| 198       | <i>Ornithoptera chimaera charybdis</i>  | (van Eecke 1915)       | New Guinea | Irian Jaya, Mt. Wayland             | -        | AB044660 | -   | -   |
| FLC_00348 | <i>Ornithoptera rothschildi</i>         | (Kenrick 1911)         | New Guinea | Irian Jaya, Mt. Arfak               | SEQ      | SEQ      | SEQ | SEQ |
| FLC_00349 | <i>Ornithoptera rothschildi</i>         | (Kenrick 1911)         | New Guinea | Irian Jaya, Mt. Arfak               | SEQ      | SEQ      | SEQ | SEQ |
| FLC_00350 | <i>Ornithoptera rothschildi</i>         | (Kenrick 1911)         | New Guinea | Irian Jaya, Mt. Arfak               | SEQ      | SEQ      | SEQ | SEQ |
| FLC_00351 | <i>Ornithoptera rothschildi</i>         | (Kenrick 1911)         | New Guinea | Irian Jaya, Mt. Arfak               | SEQ      | SEQ      | SEQ | SEQ |
| TypeO3    | <i>Ornithoptera rothschildi</i>         | (Kenrick 1911)         | New Guinea | Irian Jaya, Mt. Arfak               | -        | AB084434 | -   | -   |
| -         | <i>Ornithoptera rothschildi</i>         | (Kenrick 1911)         | New Guinea | -                                   | -        | AB027601 | -   | -   |
| FLC_00353 | <i>Ornithoptera tithonus misresiana</i> | (Joicey & Noakes 1916) | New Guinea | Irian Jaya, Mt. Arfak               | -        | SEQ      | SEQ | -   |
| EC-050    | <i>Ornithoptera tithonus ssp.</i>       | (de Haan 1840)         | New Guinea | -                                   | EF514462 | -        | -   | -   |
| EC-051    | <i>Ornithoptera tithonus ssp.</i>       | (de Haan 1840)         | New Guinea | -                                   | EF514460 | -        | -   | -   |
| EC-052    | <i>Ornithoptera tithonus ssp.</i>       | (de Haan 1840)         | New Guinea | -                                   | EF514459 | -        | -   | -   |
| TypeO1    | <i>Ornithoptera tithonus ssp.</i>       | (de Haan 1840)         | New Guinea | Irian Jaya                          | -        | AB084432 | -   | -   |
| -         | <i>Ornithoptera tithonus ssp.</i>       | (de Haan 1840)         | New Guinea | -                                   | -        | AB027602 | -   | -   |
| TypeO12   | <i>Ornithoptera alexandrae</i>          | Rothschild 1907        | New Guinea | Popondetta                          | -        | AB084443 | -   | -   |
| 366       | <i>Ornithoptera victoriae</i>           | (Gray 1856)            | Solomon    | Gela                                | -        | AB044658 | -   | -   |
| TypeO8    | <i>Ornithoptera victoriae</i>           | (Gray 1856)            | Solomon    | Bougainville                        | -        | AB084439 | -   | -   |
| FLC_00356 | <i>Trogonoptera brookiana</i>           | (Wallace 1855)         | Indonesia  | Borneo, North Sabath, Crooker range | -        | -        | -   | -   |
| EC-091    | <i>Trogonoptera brookiana</i>           | (Wallace 1855)         | Indonesia  | -                                   | EF514439 | -        | -   | -   |
| 531       | <i>Trogonoptera brookiana</i>           | (Wallace 1855)         | Indonesia  | Sumatra, Padang                     | -        | AB044647 | -   | -   |

|        |  |                               |                   |             |                   |          |          |   |   |
|--------|--|-------------------------------|-------------------|-------------|-------------------|----------|----------|---|---|
| 312    |  | <i>Trogonoptera brookiana</i> | (Wallace 1855)    | Malaysia    | Cameron Highlands | -        | AB044648 | - | - |
| -      |  | <i>Trogonoptera brookiana</i> | (Wallace 1855)    | Malaysia    | Cameron Highlands | -        | AB084428 | - | - |
| EC-089 |  | <i>Trogonoptera trojana</i>   | (Staudinger 1889) | Philippines | Lanjuan, Palawan  | EF514444 | -        | - | - |
| EC-090 |  | <i>Trogonoptera trojana</i>   | (Staudinger 1889) | Philippines | Lanjuan, Palawan  | EF514436 | -        | - | - |

Figure S1. (a) Geographic distribution of *Ornithoptera priamus* and its subspecies. Adapted from Haugum and Low<sup>1</sup>. Map drawn with PowerPoint.

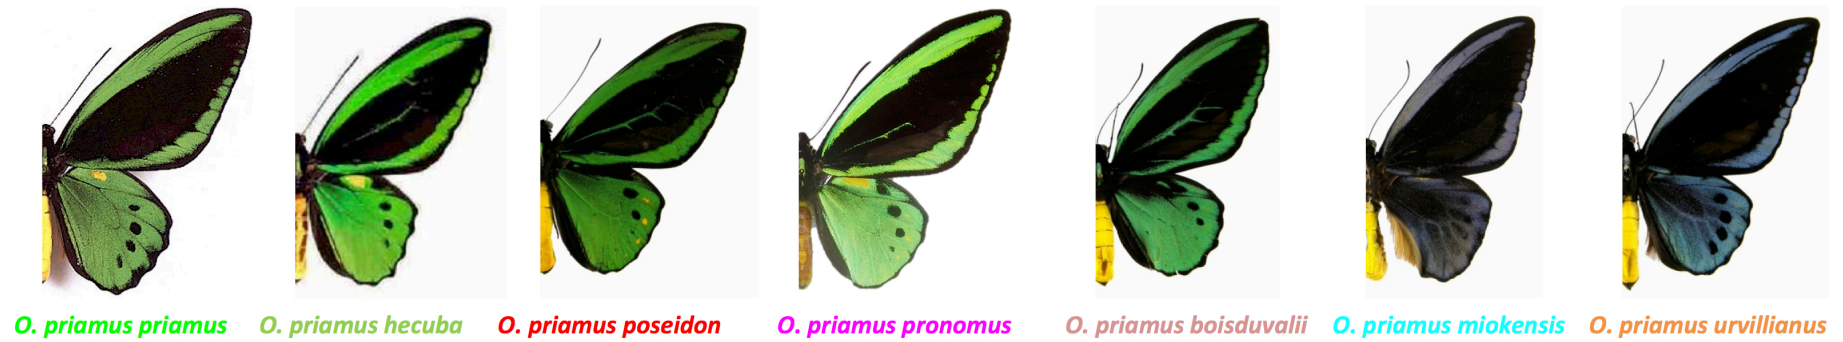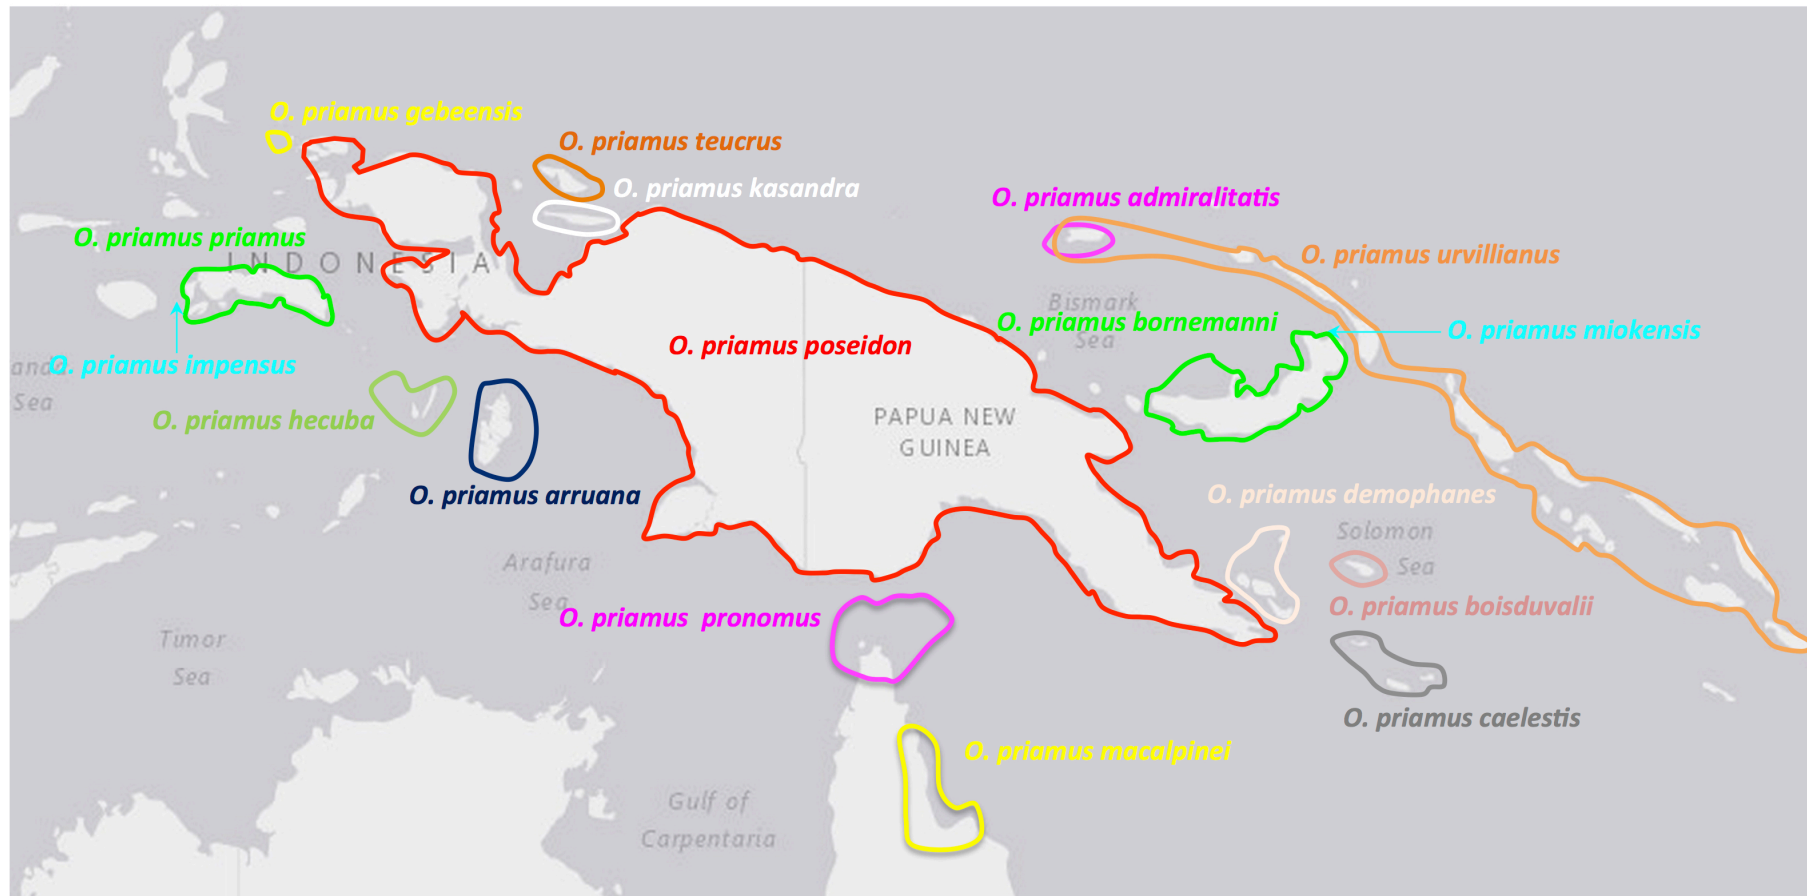

Figure S1. (b) Geographic distribution of *Troides helena* and its subspecies. Adapted from Haugum and Low<sup>1</sup>. Map drawn with PowerPoint.

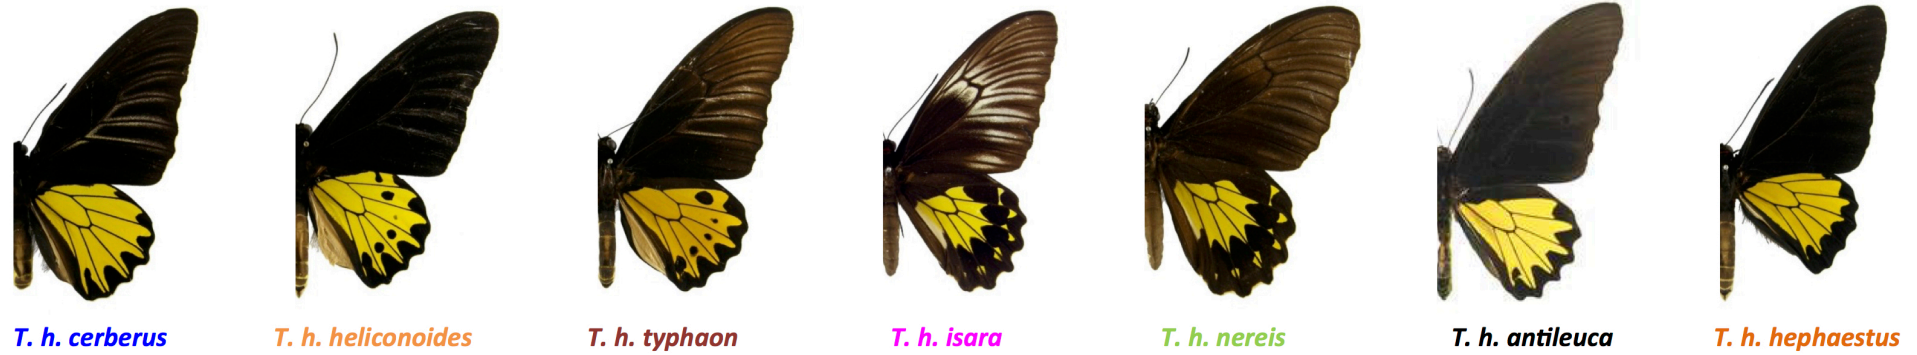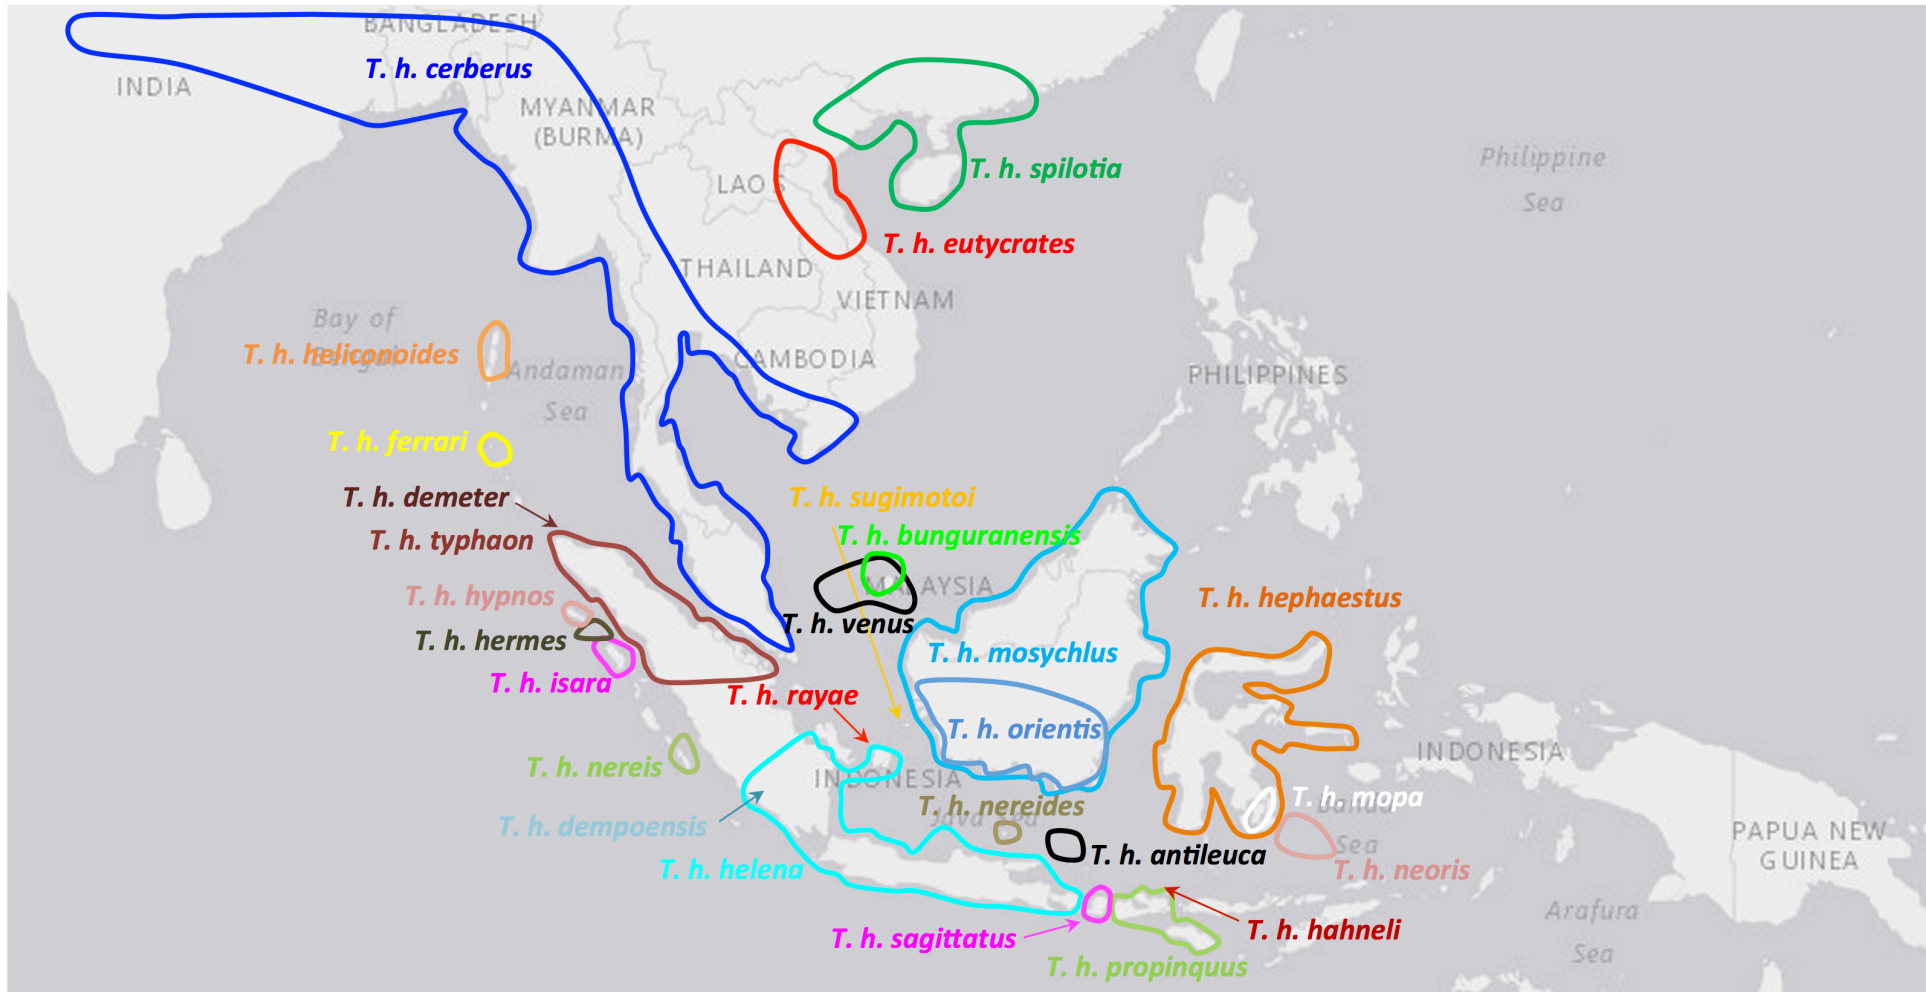

**Figure S2. (a) Bayesian phylogeny of the COI gene.**

**Figure S2. (b) Bayesian phylogeny of the ND5 gene.**

**Figure S2. (c) Bayesian phylogeny of the 16S gene.**

**Figure S2. (d) Bayesian phylogeny of the EF-1 $\alpha$  gene.**

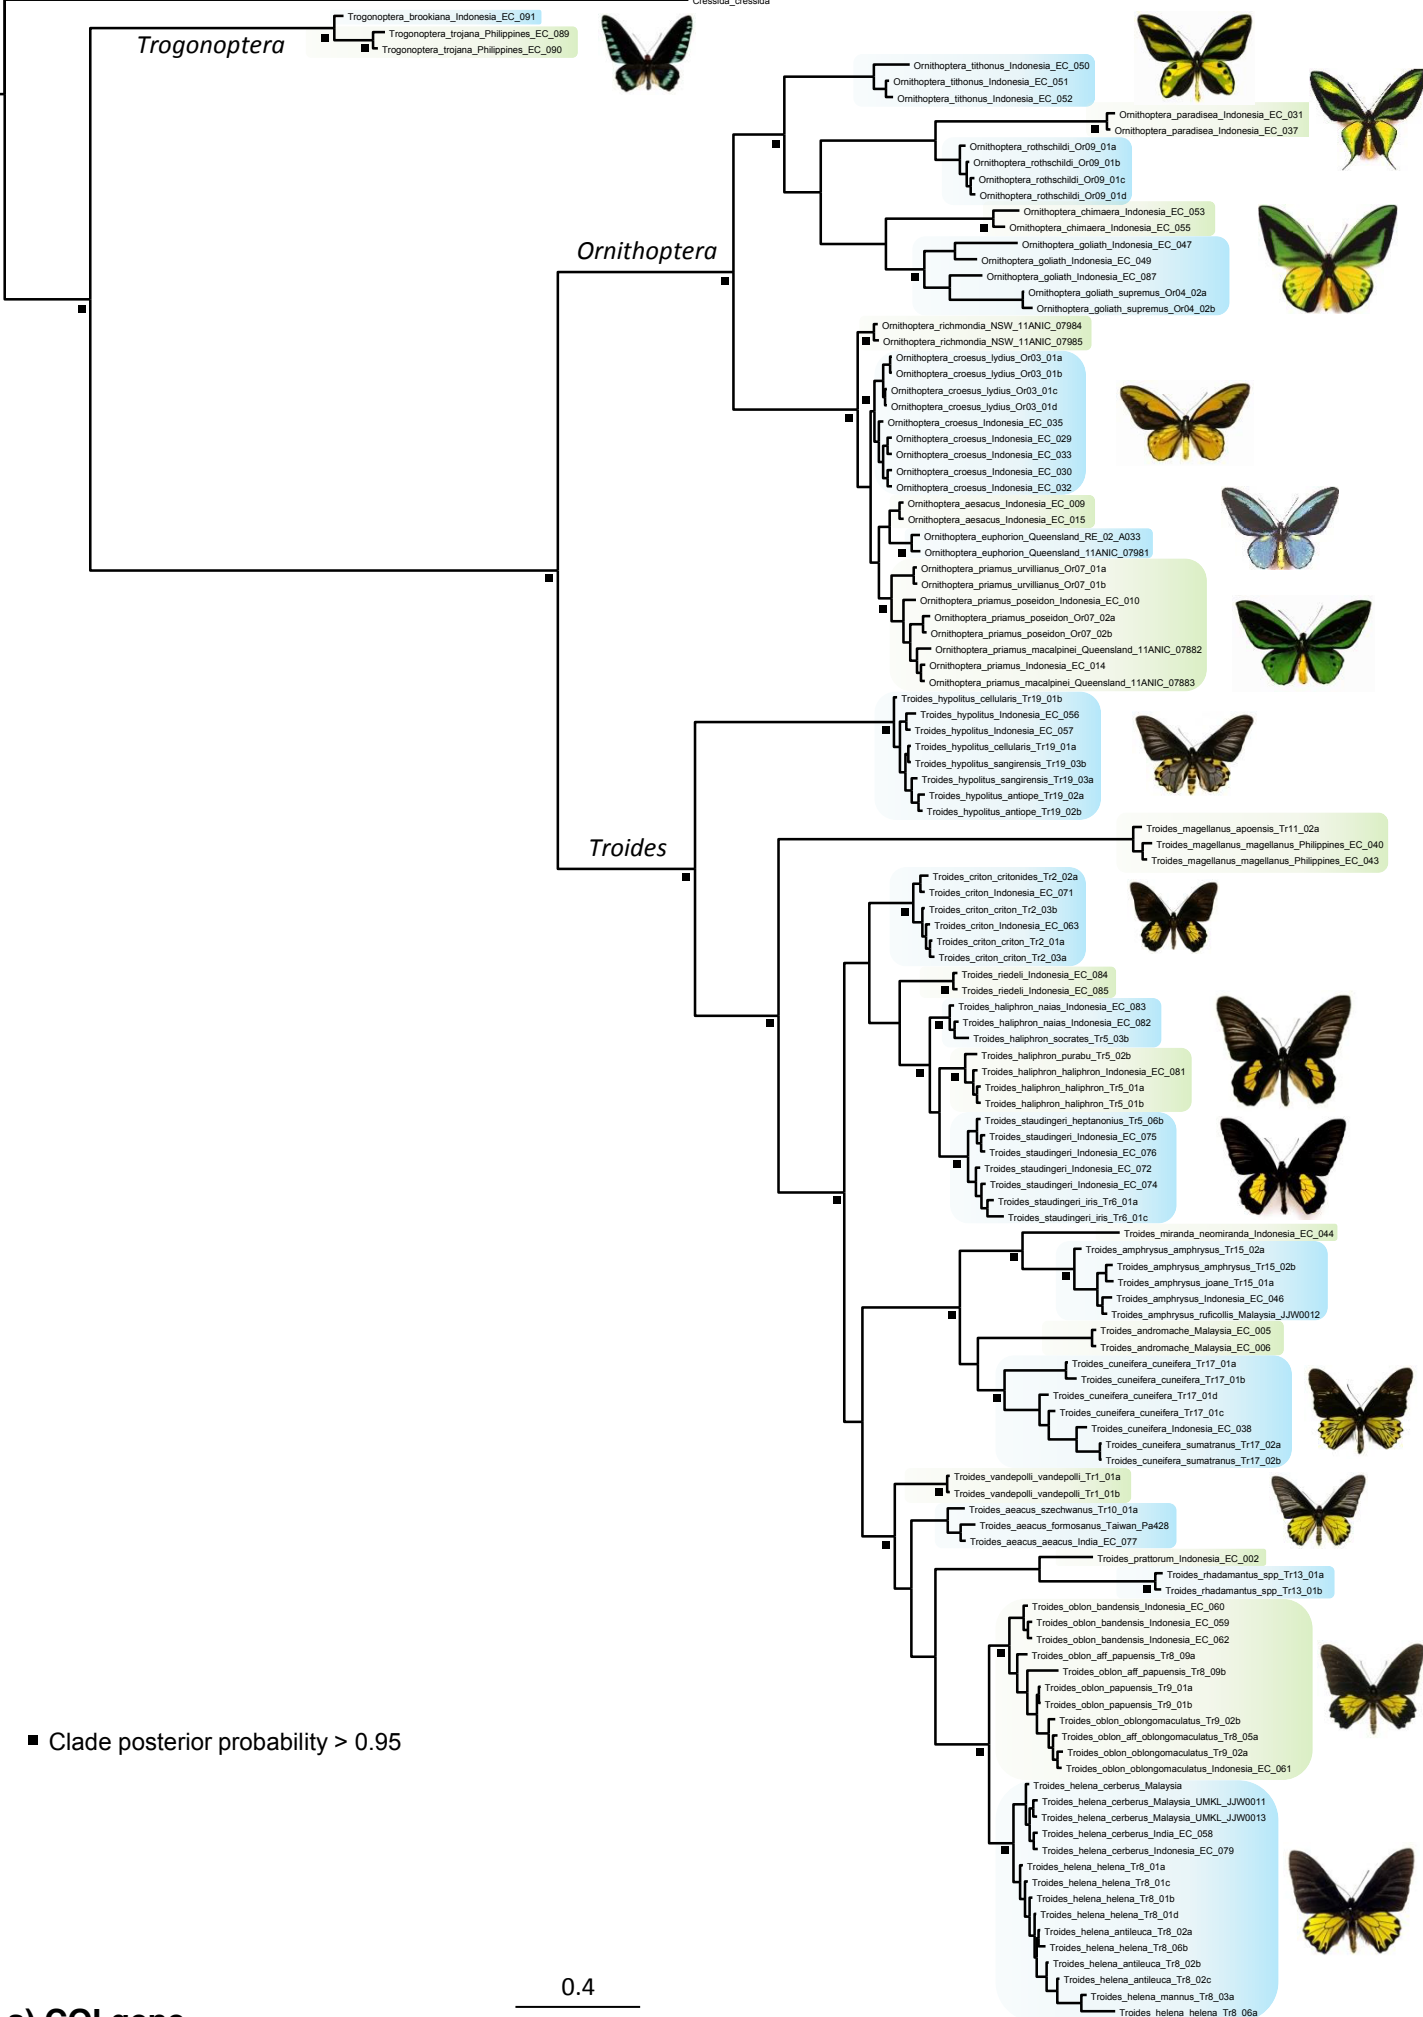

*Trogonoptera**Ornithoptera**Troides*

■ Clade posterior probability > 0.95

0.2

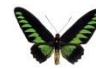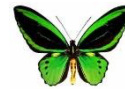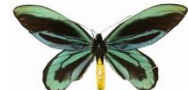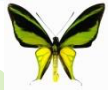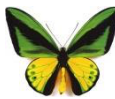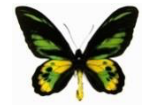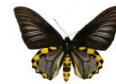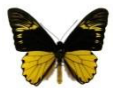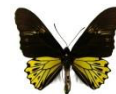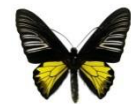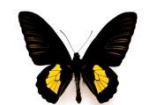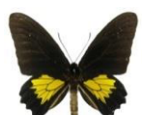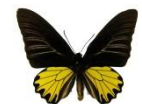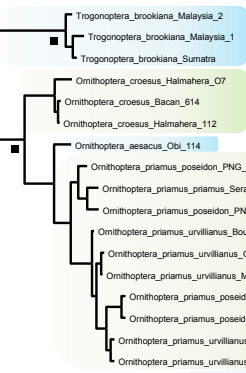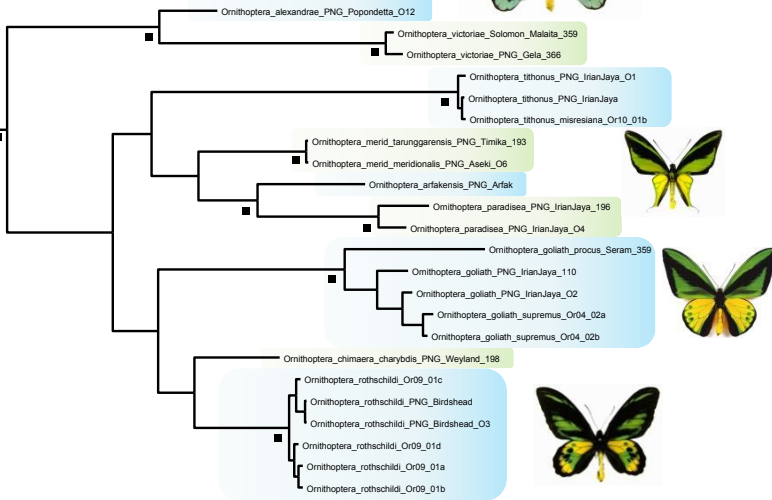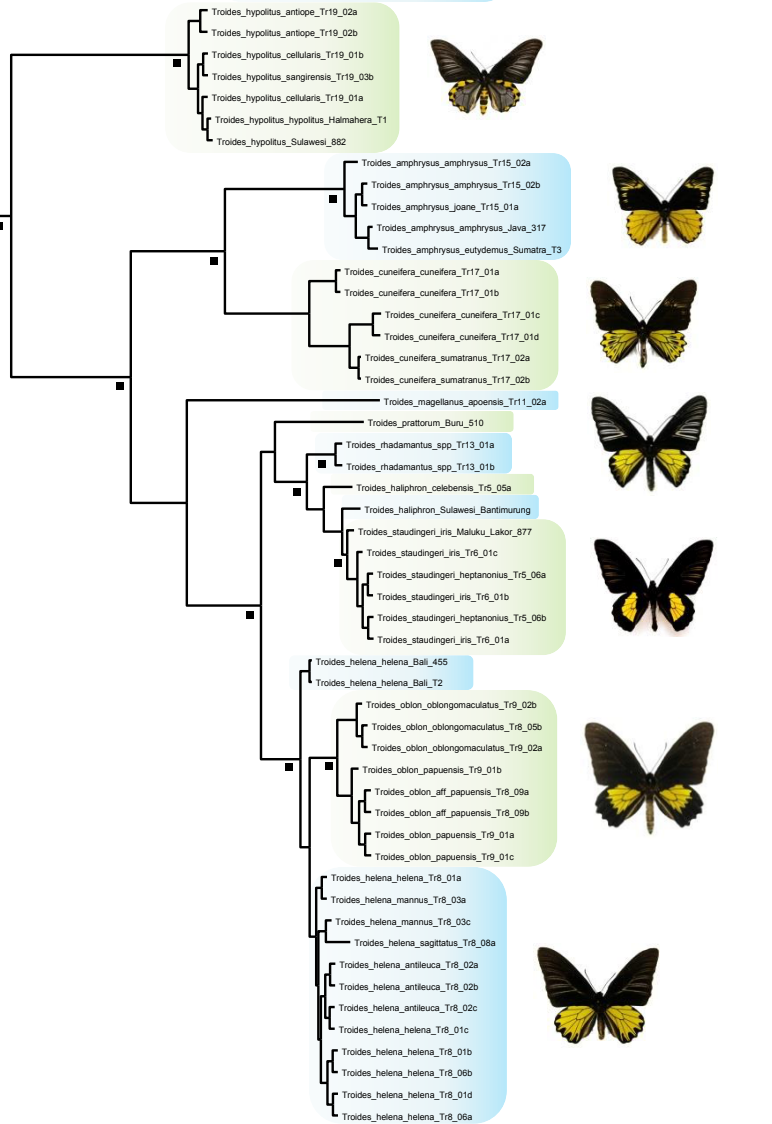

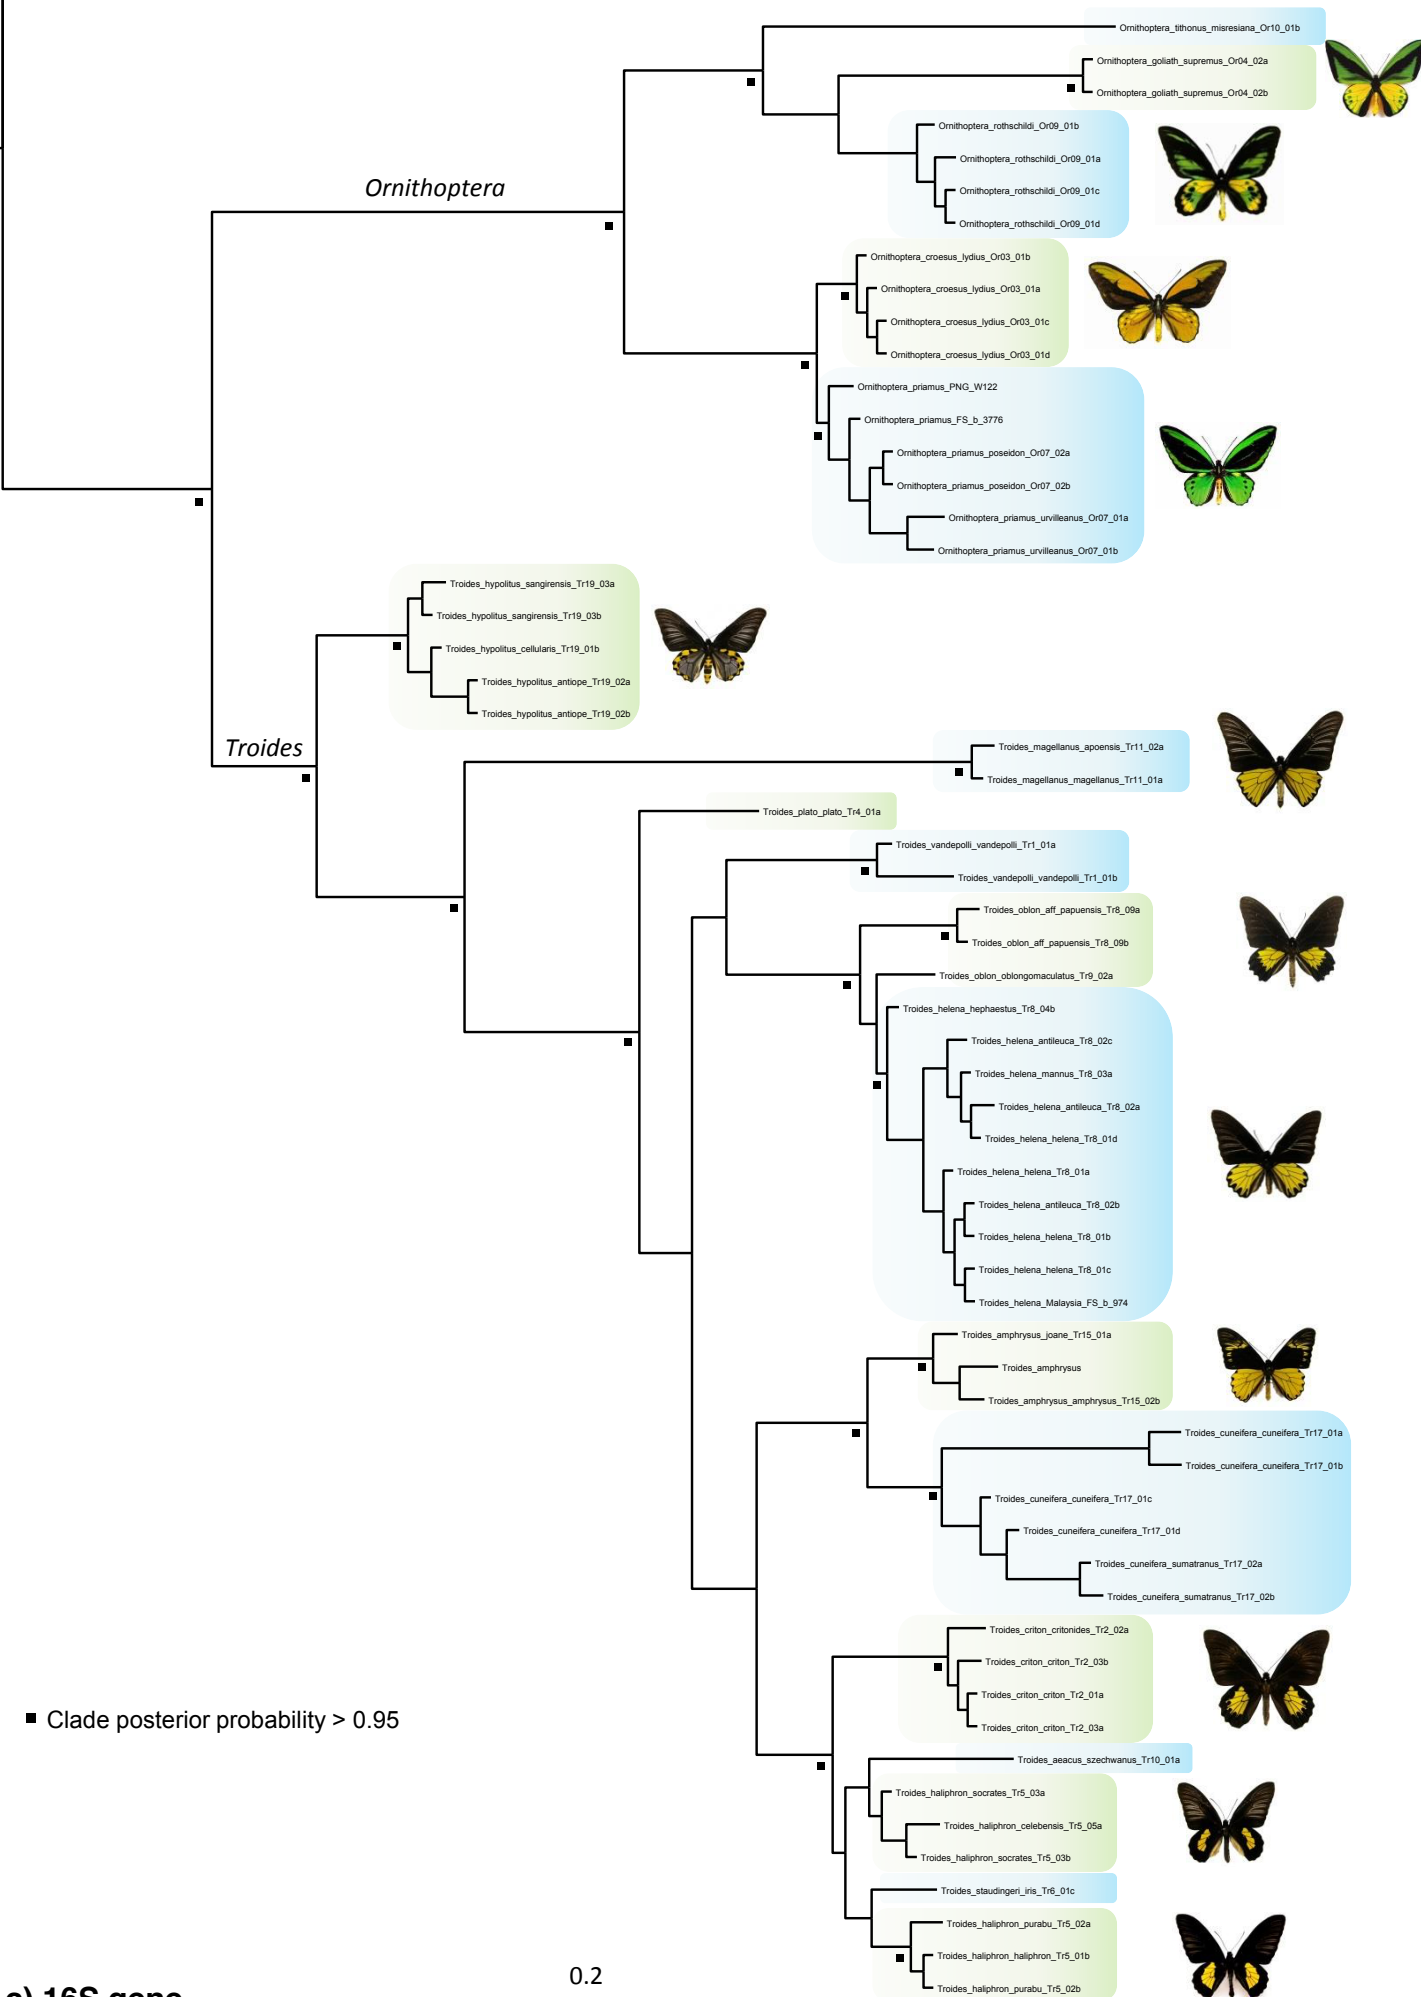



Trogonoptera

Trogonoptera\_brockiana\_Trg0\_01b

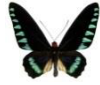

Ornithoptera

Ornithoptera\_rothschildi\_Or09\_01b

Ornithoptera\_rothschildi\_Or09\_01c

Ornithoptera\_rothschildi\_Or09\_01d

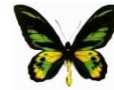

Ornithoptera\_goliath\_samson\_Or04\_01a

Ornithoptera\_goliath\_samson\_Or04\_01b

Ornithoptera\_goliath\_supremus\_Or04\_02a

Ornithoptera\_goliath\_supremus\_Or04\_02b

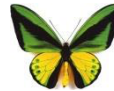

Ornithoptera\_euphorion

Ornithoptera\_croesus\_lydius\_Or03\_01d

Ornithoptera\_croesus\_lydius\_Or03\_01c

Ornithoptera\_croesus\_lydius\_Or03\_01a

Ornithoptera\_croesus\_lydius\_Or03\_01b

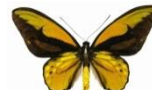

Ornithoptera\_priamus\_poseldon\_Or07\_02b

Ornithoptera\_priamus\_uvillenaus\_Or07\_01a

Ornithoptera\_priamus\_uvillenaus\_Or07\_01b

Ornithoptera\_priamus\_poseldon\_Or07\_02a

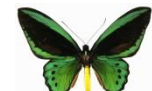

Troides\_hypollitus\_cellularis\_Tr19\_01b

Troides\_hypollitus\_sangirensis\_Tr19\_03b

Troides\_hypollitus\_antiope\_Tr19\_02a

Troides\_hypollitus\_cellularis\_Tr19\_01a

Troides\_hypollitus\_antiope\_Tr19\_02b

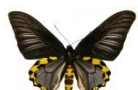

Troides

Troides\_magellanus\_magellanus\_Tr11\_01a

Troides\_magellanus\_apoensis\_Tr11\_02a

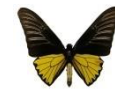

Troides\_amphrysus\_joane\_Tr15\_01a

Troides\_amphrysus\_amphrysus\_Tr15\_02a

Troides\_amphrysus\_amphrysus\_Tr15\_02b

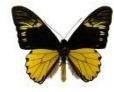

Troides\_cuneifera\_cuneifera\_Tr17\_01a

Troides\_cuneifera\_cuneifera\_Tr17\_01b

Troides\_cuneifera\_sumatranus\_Tr17\_02b

Troides\_cuneifera\_sumatranus\_Tr17\_02a

Troides\_cuneifera\_cuneifera\_Tr17\_01c

Troides\_cuneifera\_cuneifera\_Tr17\_01d

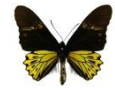

Troides\_aeaacus\_szechwanus\_Tr10\_01a

Troides\_haliphron\_haliphron\_Tr15\_01a

Troides\_haliphron\_purabu\_Tr15\_02b

Troides\_haliphron\_haliphron\_Tr15\_01b

Troides\_haliphron\_purabu\_Tr15\_02a

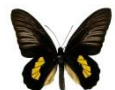

Troides\_vandepoili\_vandepoili\_Tr1\_01a

Troides\_criton\_criton\_Tr12\_03a

Troides\_criton\_criton\_Tr12\_01a

Troides\_criton\_criton\_Tr12\_03b

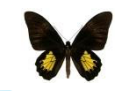

Troides\_haliphron\_socrates\_Tr15\_03b

Troides\_haliphron\_socrates\_Tr15\_03a

Troides\_staudingeri\_iris\_Tr16\_01c

Troides\_staudingeri\_heptanonivus\_Tr15\_06a

Troides\_staudingeri\_iris\_Tr16\_01a

Troides\_staudingeri\_heptanonivus\_Tr15\_06b

Troides\_staudingeri\_iris\_Tr16\_01b

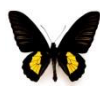

Troides\_helena\_mannus\_Tr8\_03a

Troides\_oblon\_papuensis\_Tr9\_01a

Troides\_helena\_helena\_Tr8\_01c

Troides\_helena\_helena\_Tr8\_01d

Troides\_helena\_helena\_Tr8\_01a

Troides\_oblon\_oblongomaculatus\_Tr9\_02b

Troides\_helena\_mannus\_Tr8\_03b

Troides\_helena\_mannus\_Tr8\_03c

Troides\_helena\_helena\_Tr8\_01b

Troides\_oblon\_oblongomaculatus\_Tr9\_02a

Troides\_helena\_ssp\_Tr8\_06a

Troides\_oblon\_papuensis\_Tr9\_01c

Troides\_oblon\_oblongomaculatus\_Tr8\_05a

Troides\_oblon\_aff\_papuensis\_Tr8\_09a

Troides\_helena\_ssp\_Tr8\_06b

Troides\_helena\_antileuca\_Tr8\_02c

Troides\_helena\_antileuca\_Tr8\_02a

Troides\_helena\_antileuca\_Tr8\_02b

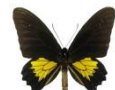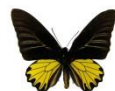

■ Clade posterior probability > 0.95

0.2

**Figure S3. Biogeographical reconstructions as estimated with DEC, DEC+J, DIVA-like, DIVA-like+J, BayArea-like and BayArea-like+J models. The best model is DEC+J (see Table S1).**

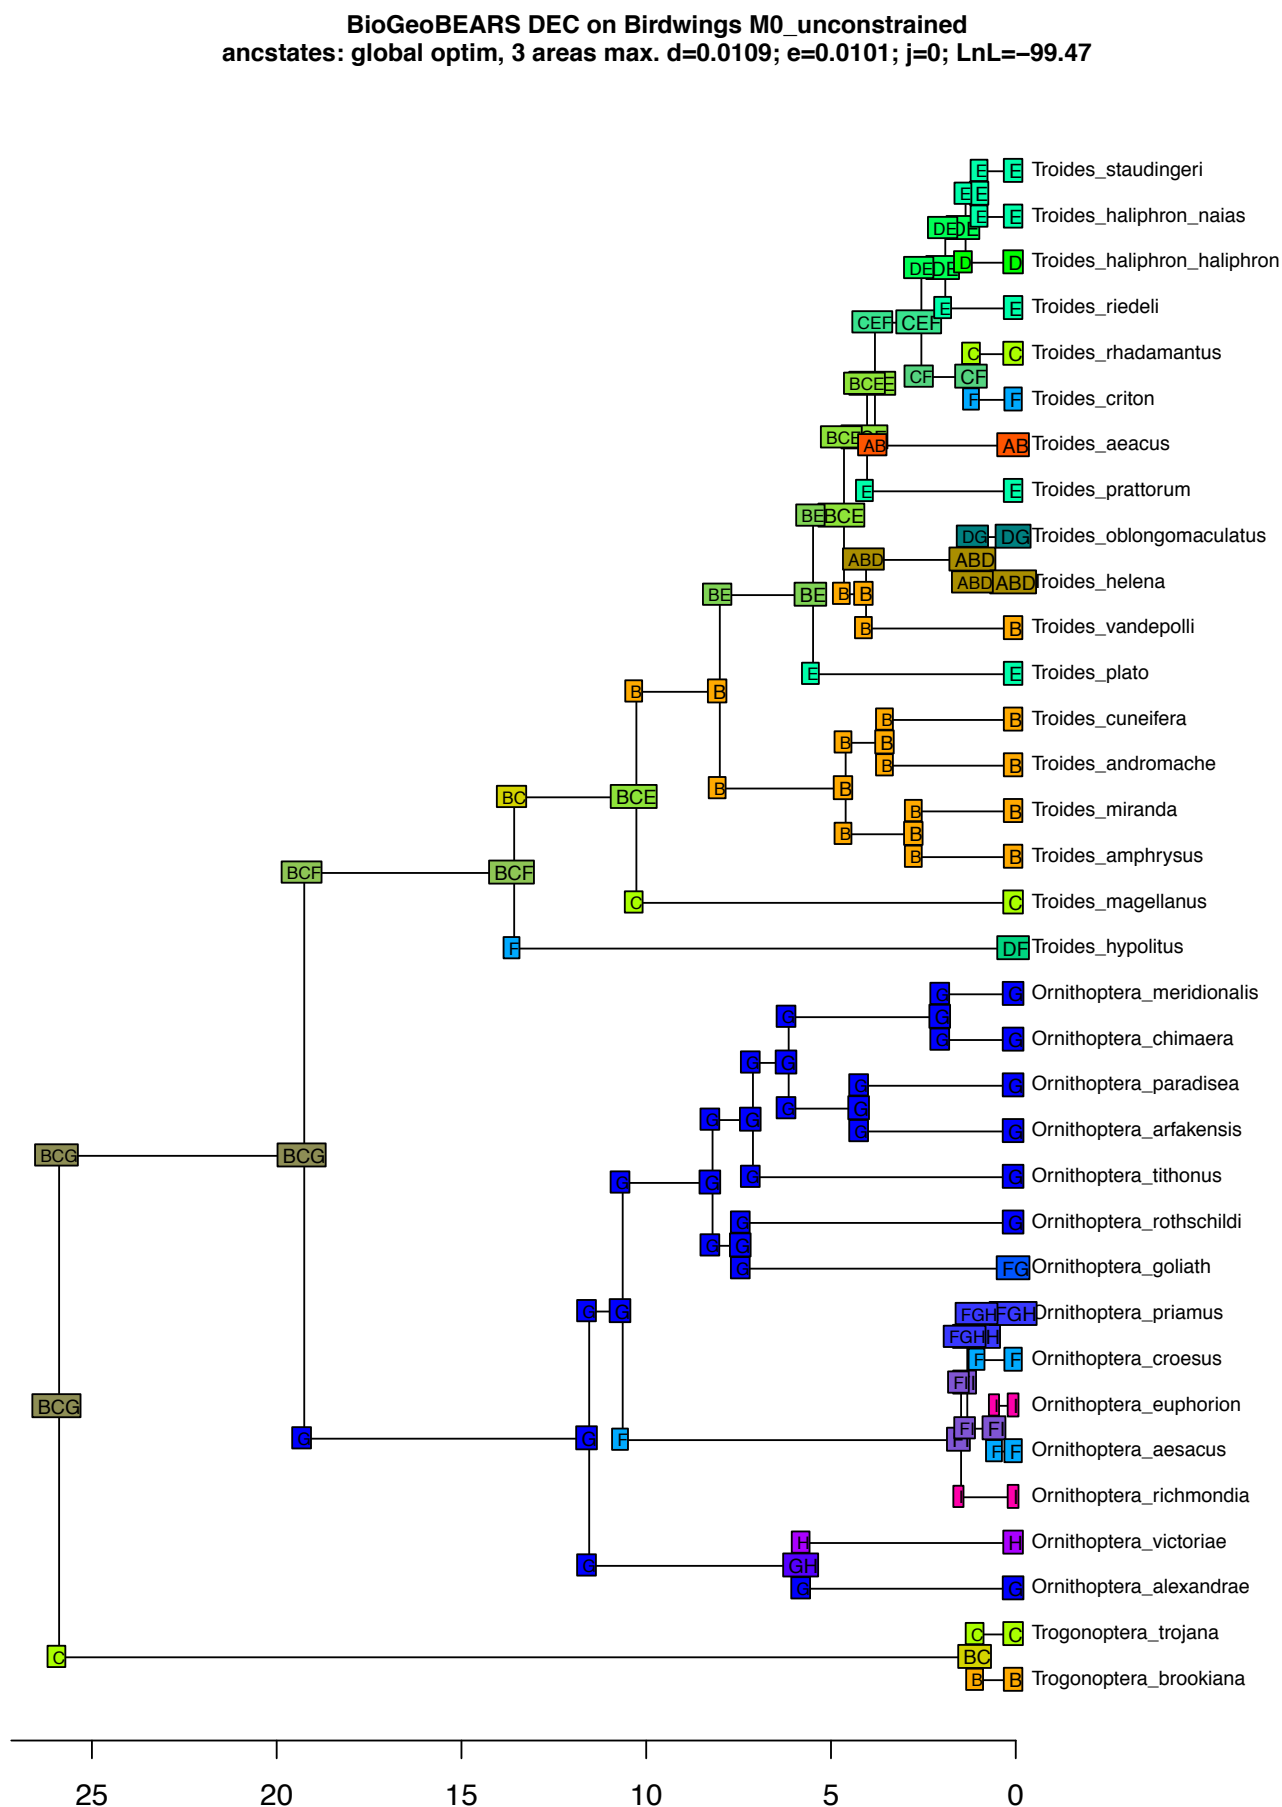

**BioGeoBEARS DEC on Birdwings M0\_unconstrained**  
**ancstates: global optim, 3 areas max. d=0.0109; e=0.0101; j=0; LnL=-99.47**

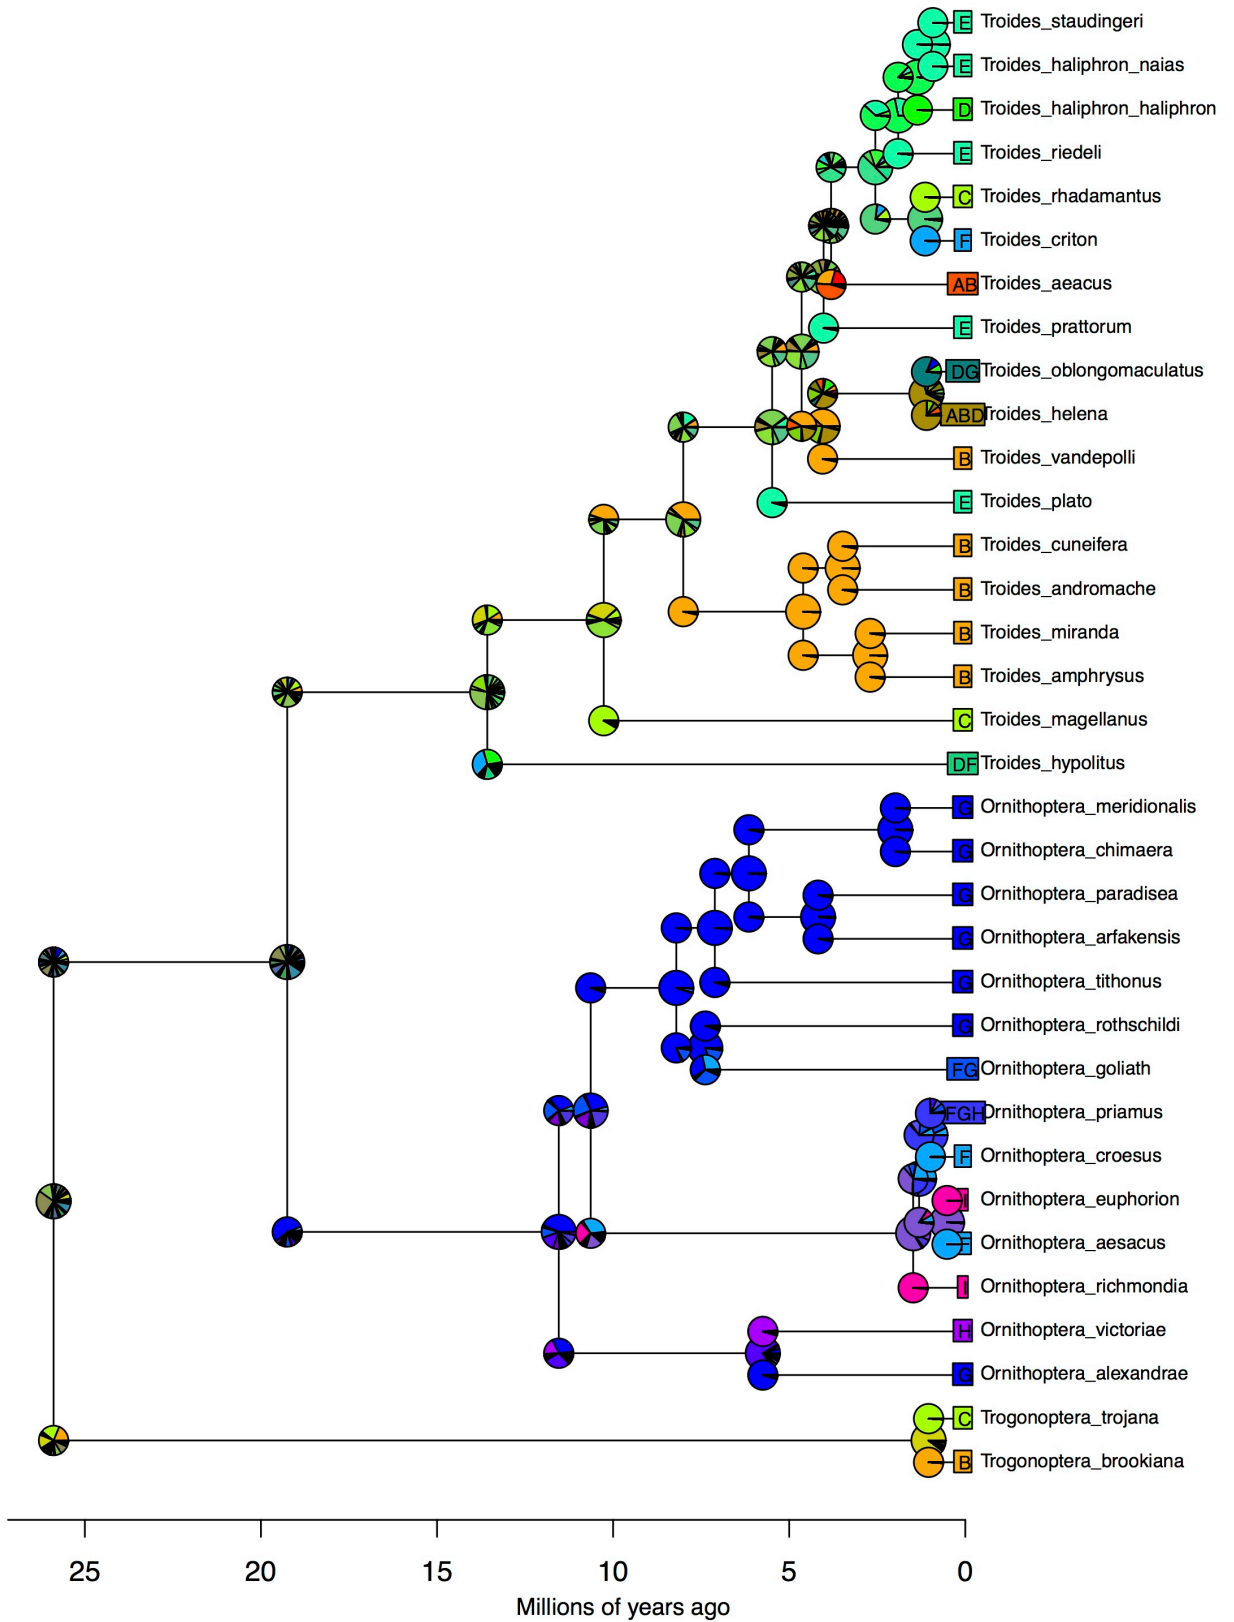

BioGeoBEARS DEC+J on Birdwings M0\_unconstrained  
 ancstates: global optim, 3 areas max. d=0.0055; e=0; j=0.0432; LnL=-90.80

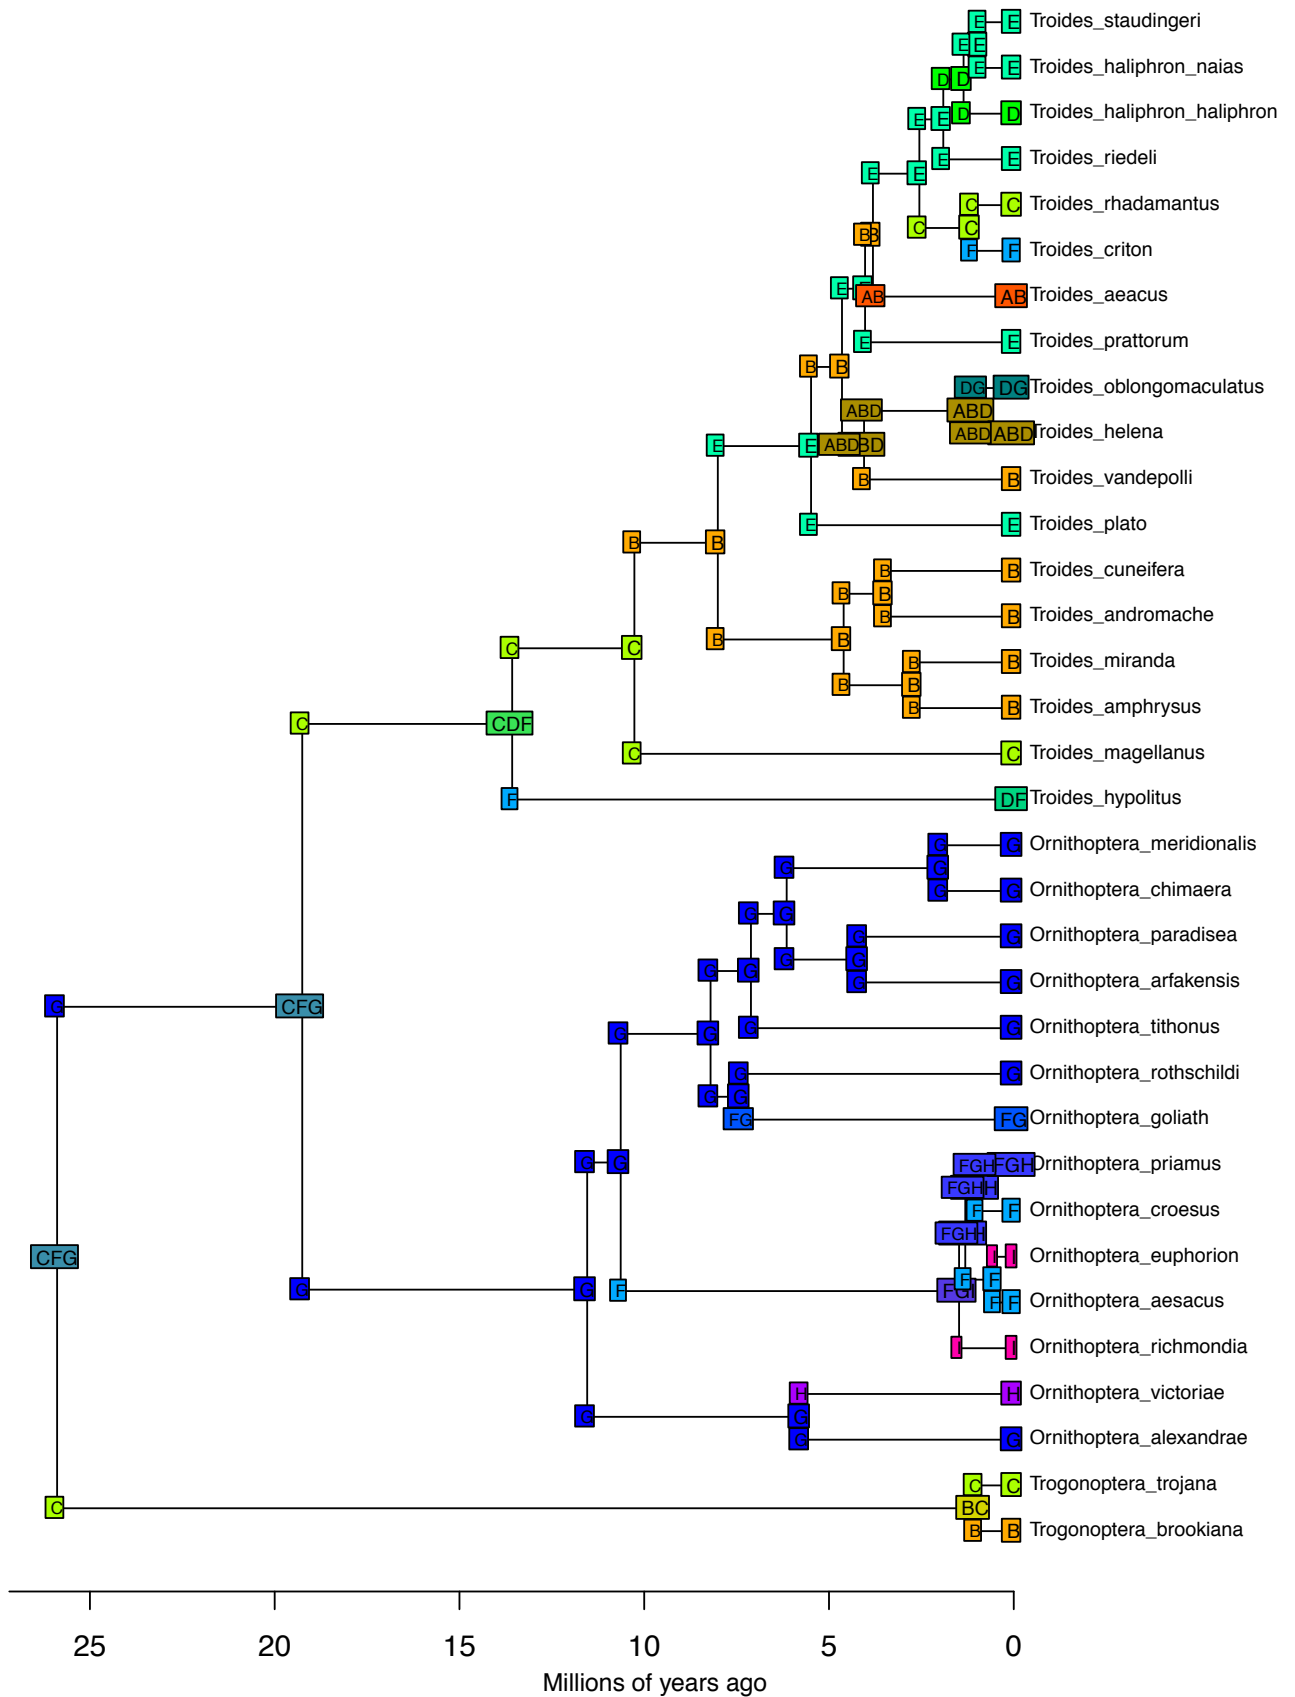

**BioGeoBEARS DEC+J on Birdwings M0\_unconstrained**  
**ancstates: global optim, 3 areas max. d=0.0055; e=0; j=0.0432; LnL=-90.80**

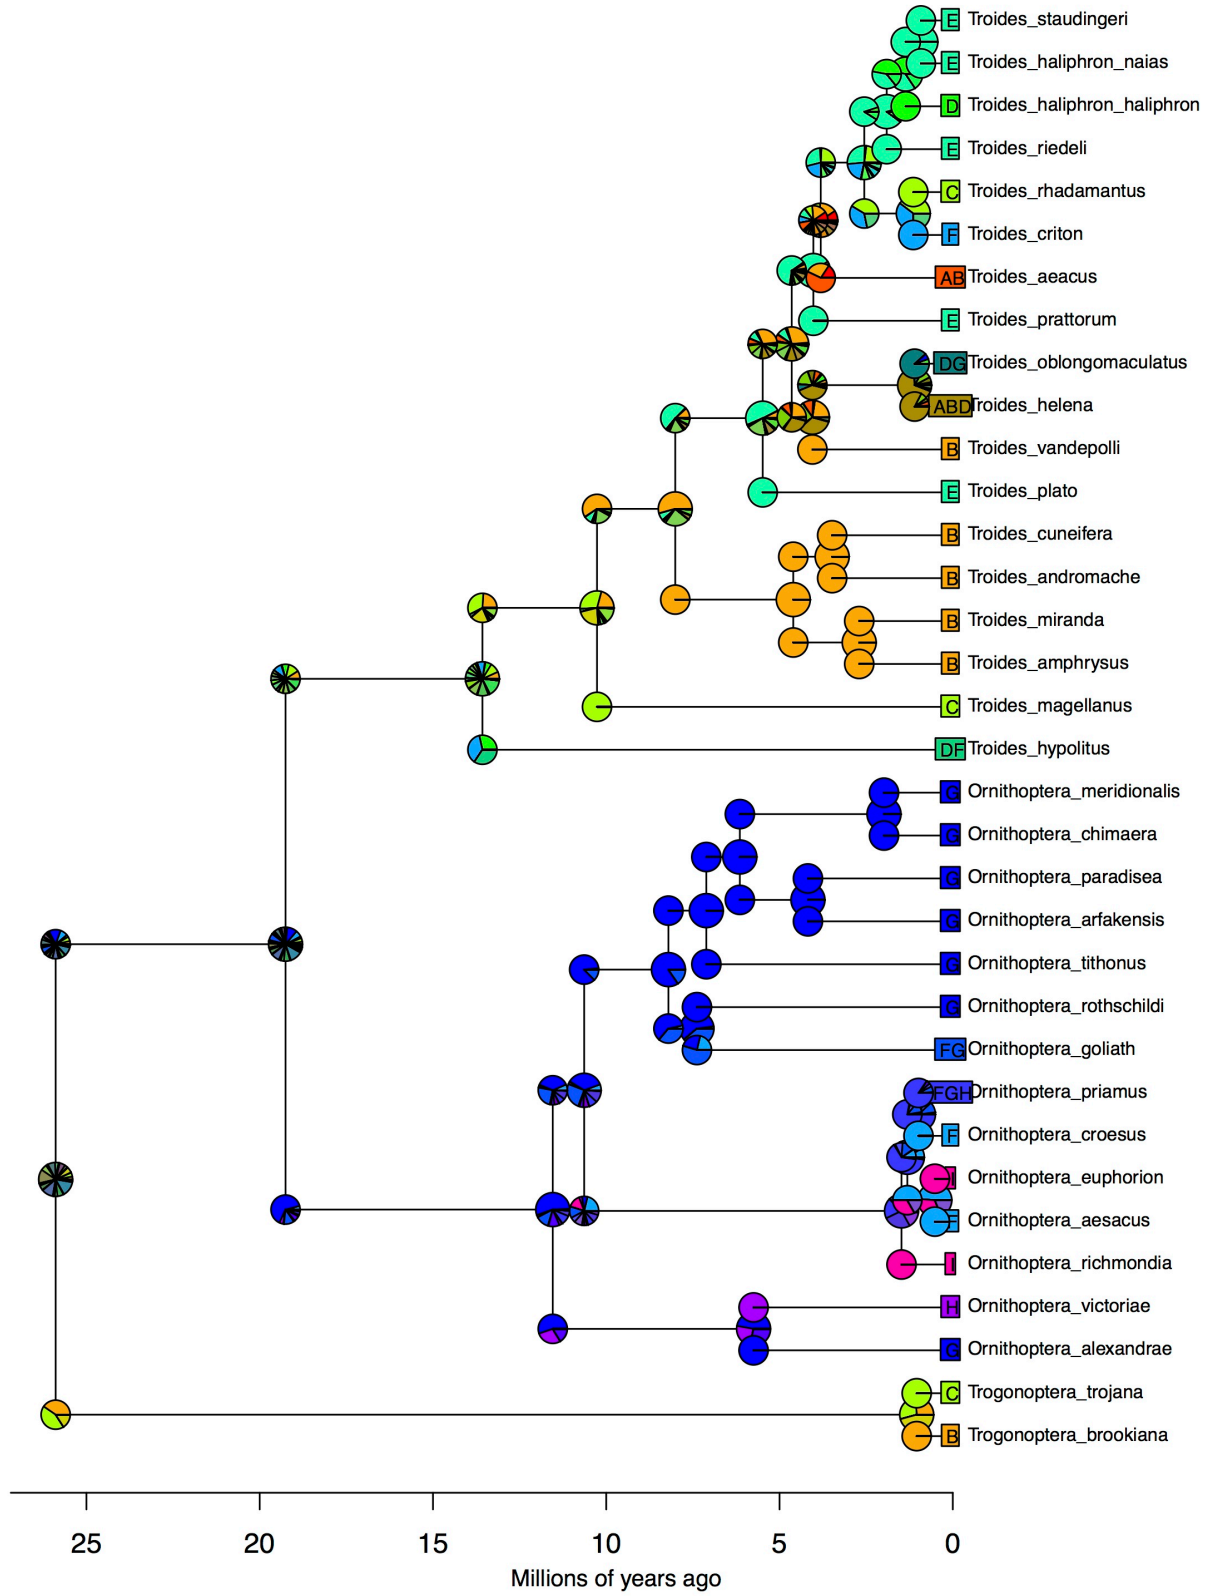

BioGeoBEARS DIVALIKE on Birdwings M0\_unconstrained  
 ancstates: global optim, 3 areas max. d=0.0143; e=0.0136; j=0; LnL=-101.55

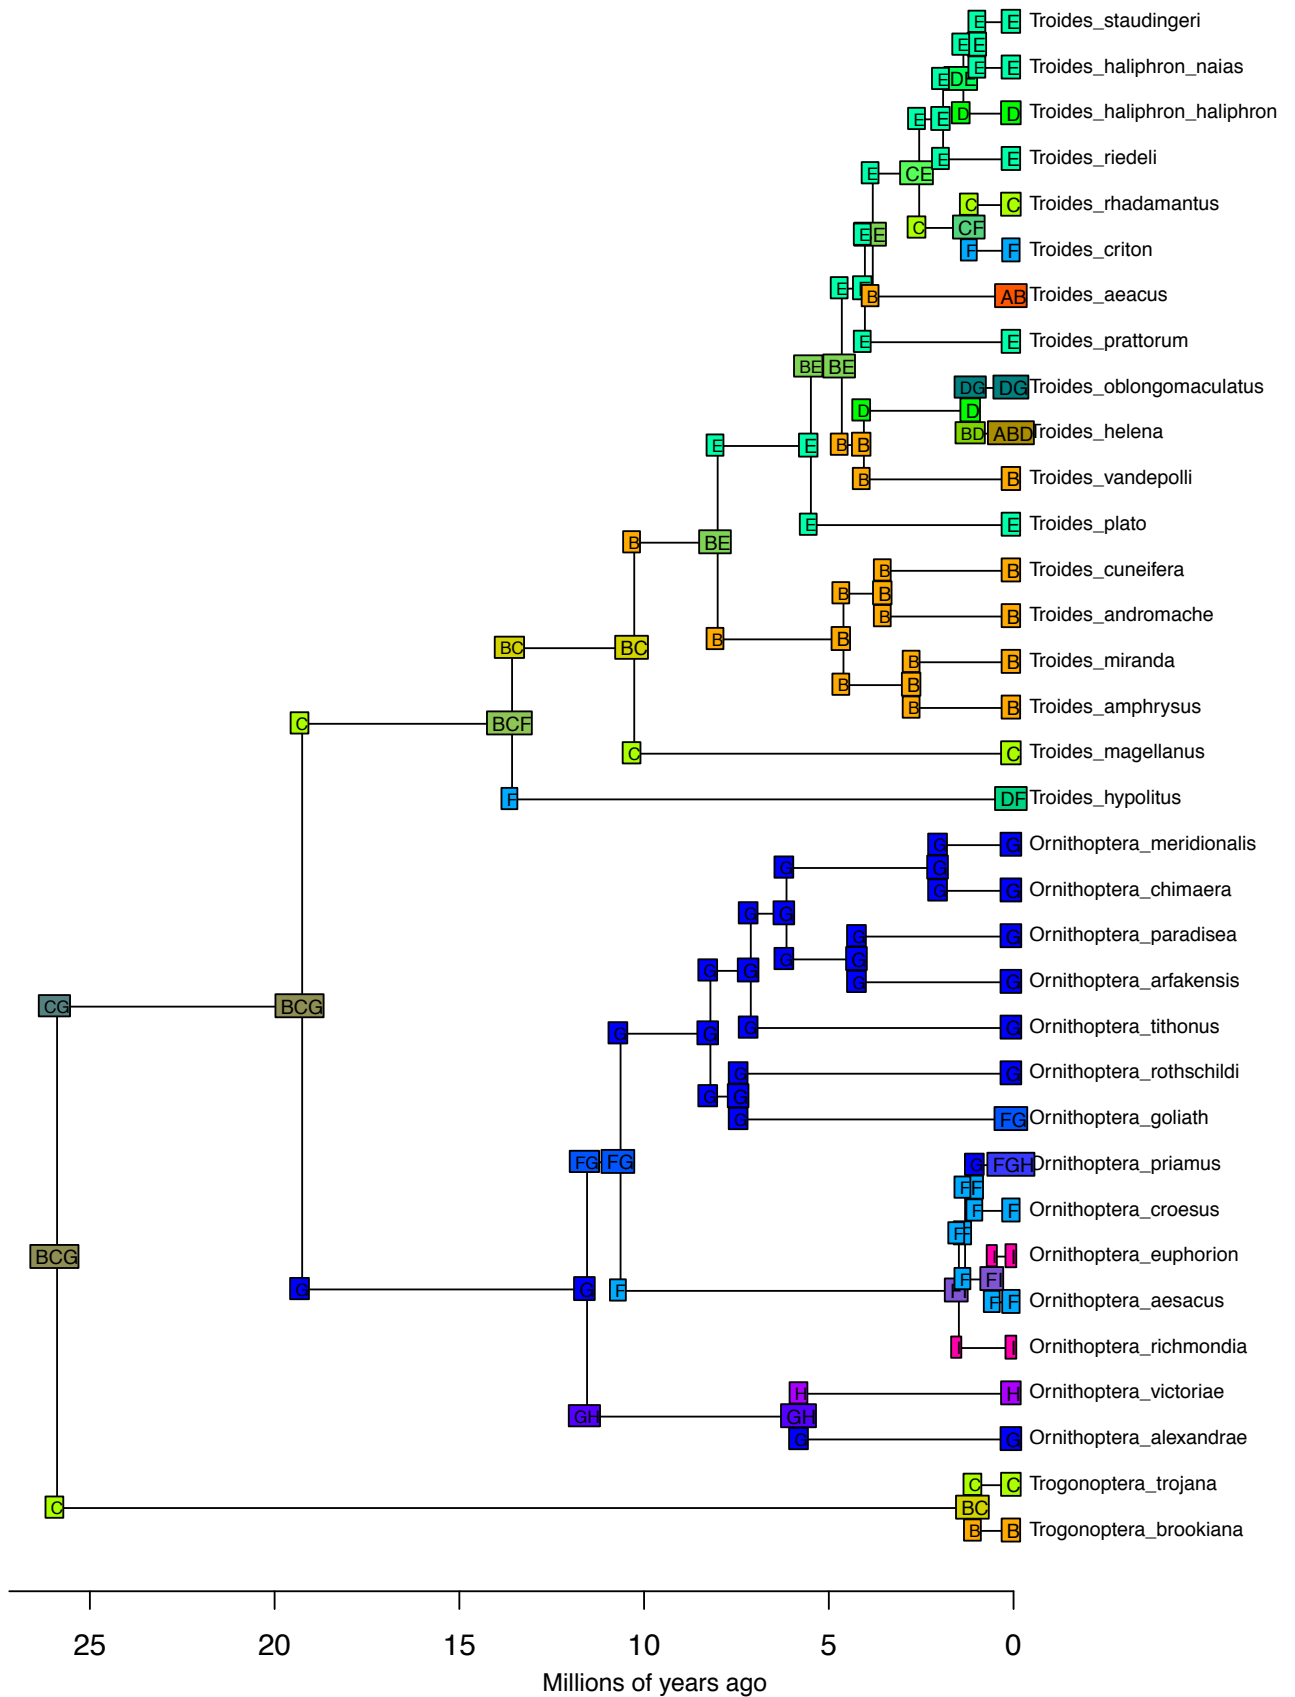

**BioGeoBEARS DIVALIKE on Birdwings MO\_unconstrained**  
**ancstates: global optim, 3 areas max. d=0.0143; e=0.0136; j=0; LnL=-101.55**

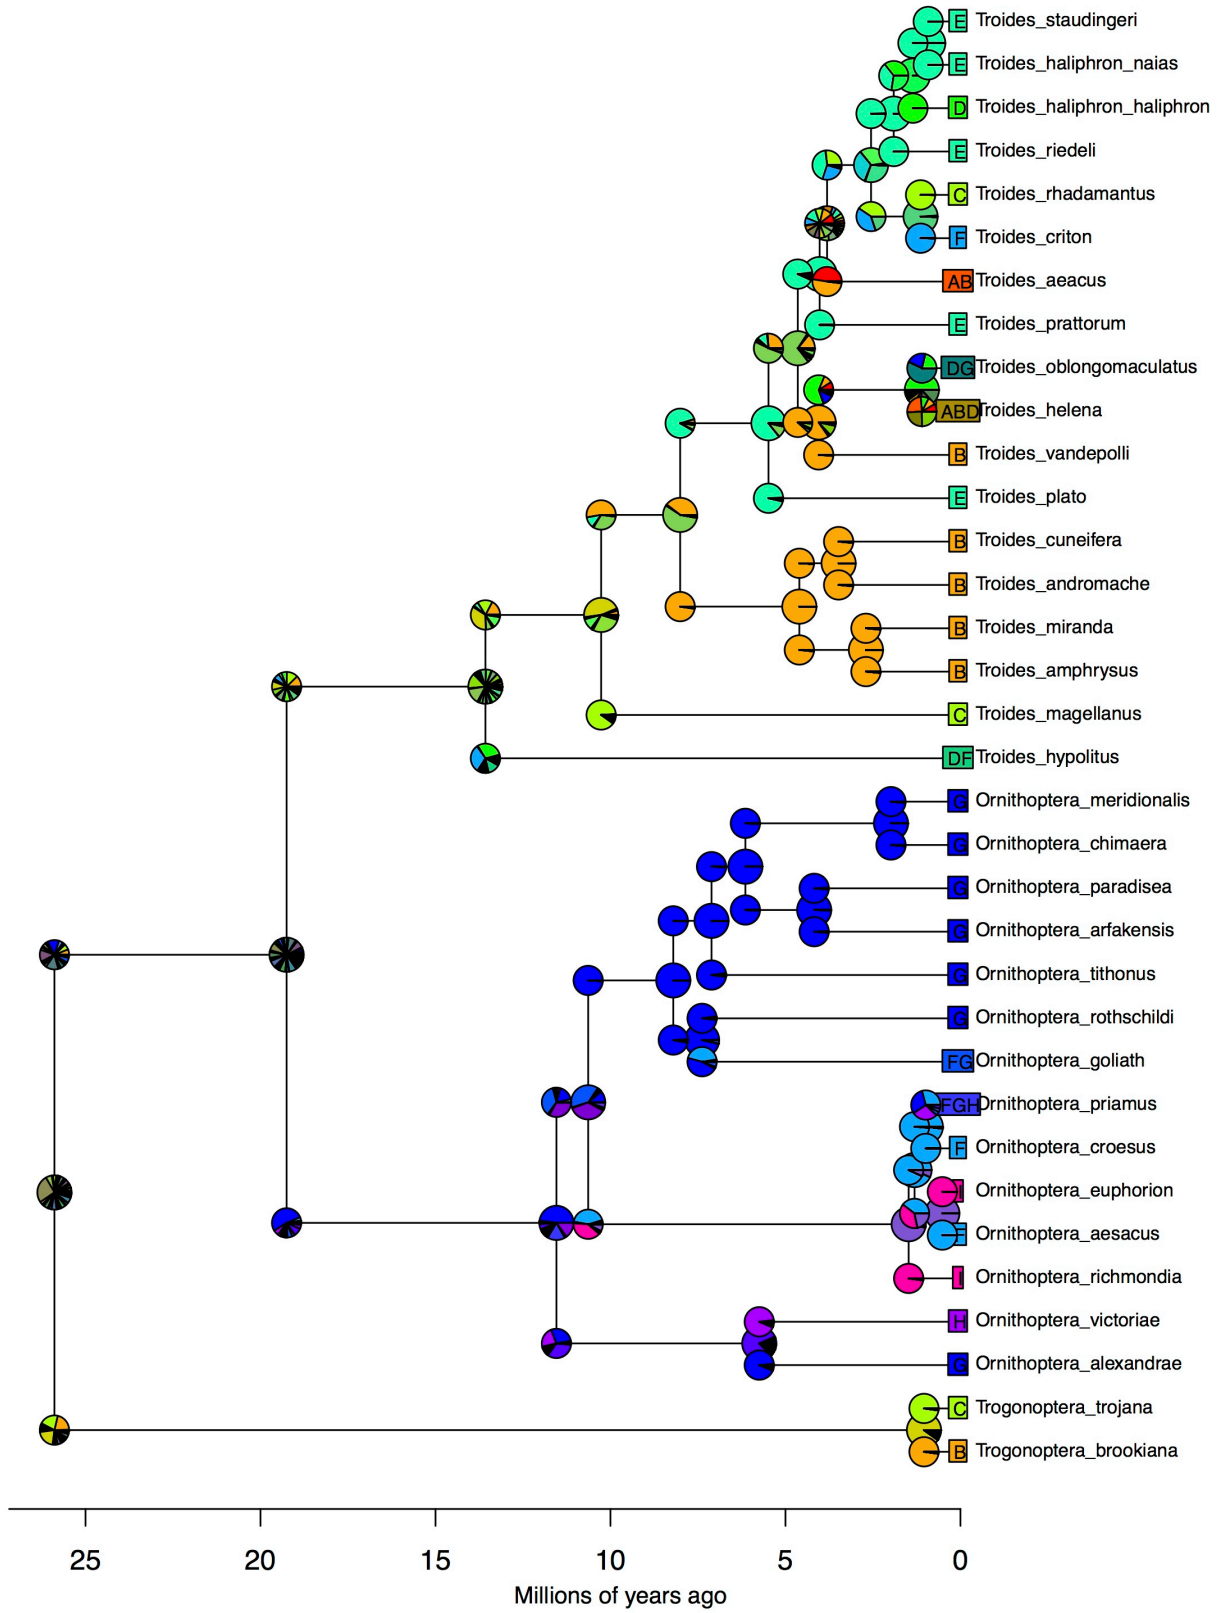

BioGeoBEARS DIVALIKE+J on Birdwings M0\_unconstrained  
 ancstates: global optim, 3 areas max. d=0.0062; e=0; j=0.0413; LnL=-92.09

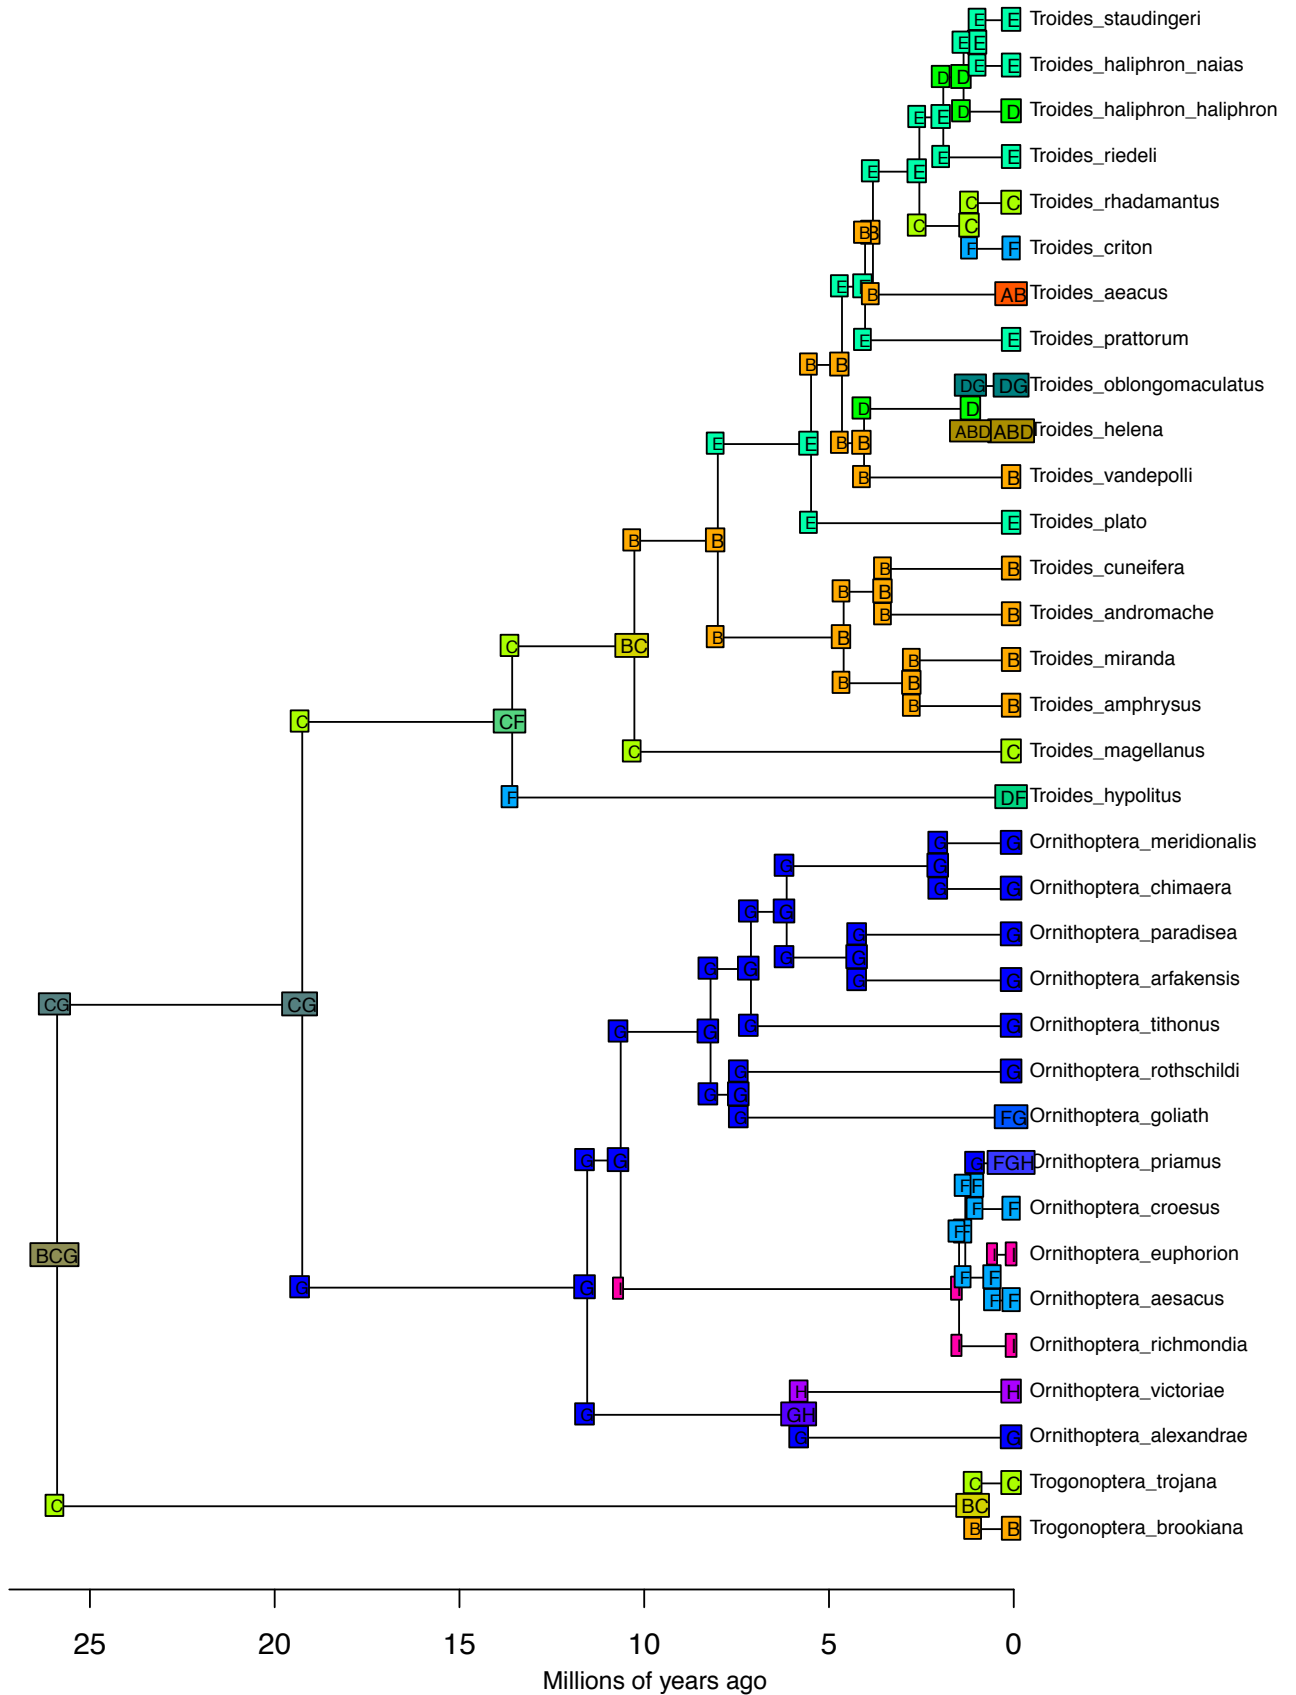



**BioGeoBEARS DIVALIKE+J on Birdwings M0\_unconstrained**  
 ancstates: global optim, 3 areas max. d=0.0062; e=0; j=0.0413; LnL=-92.09

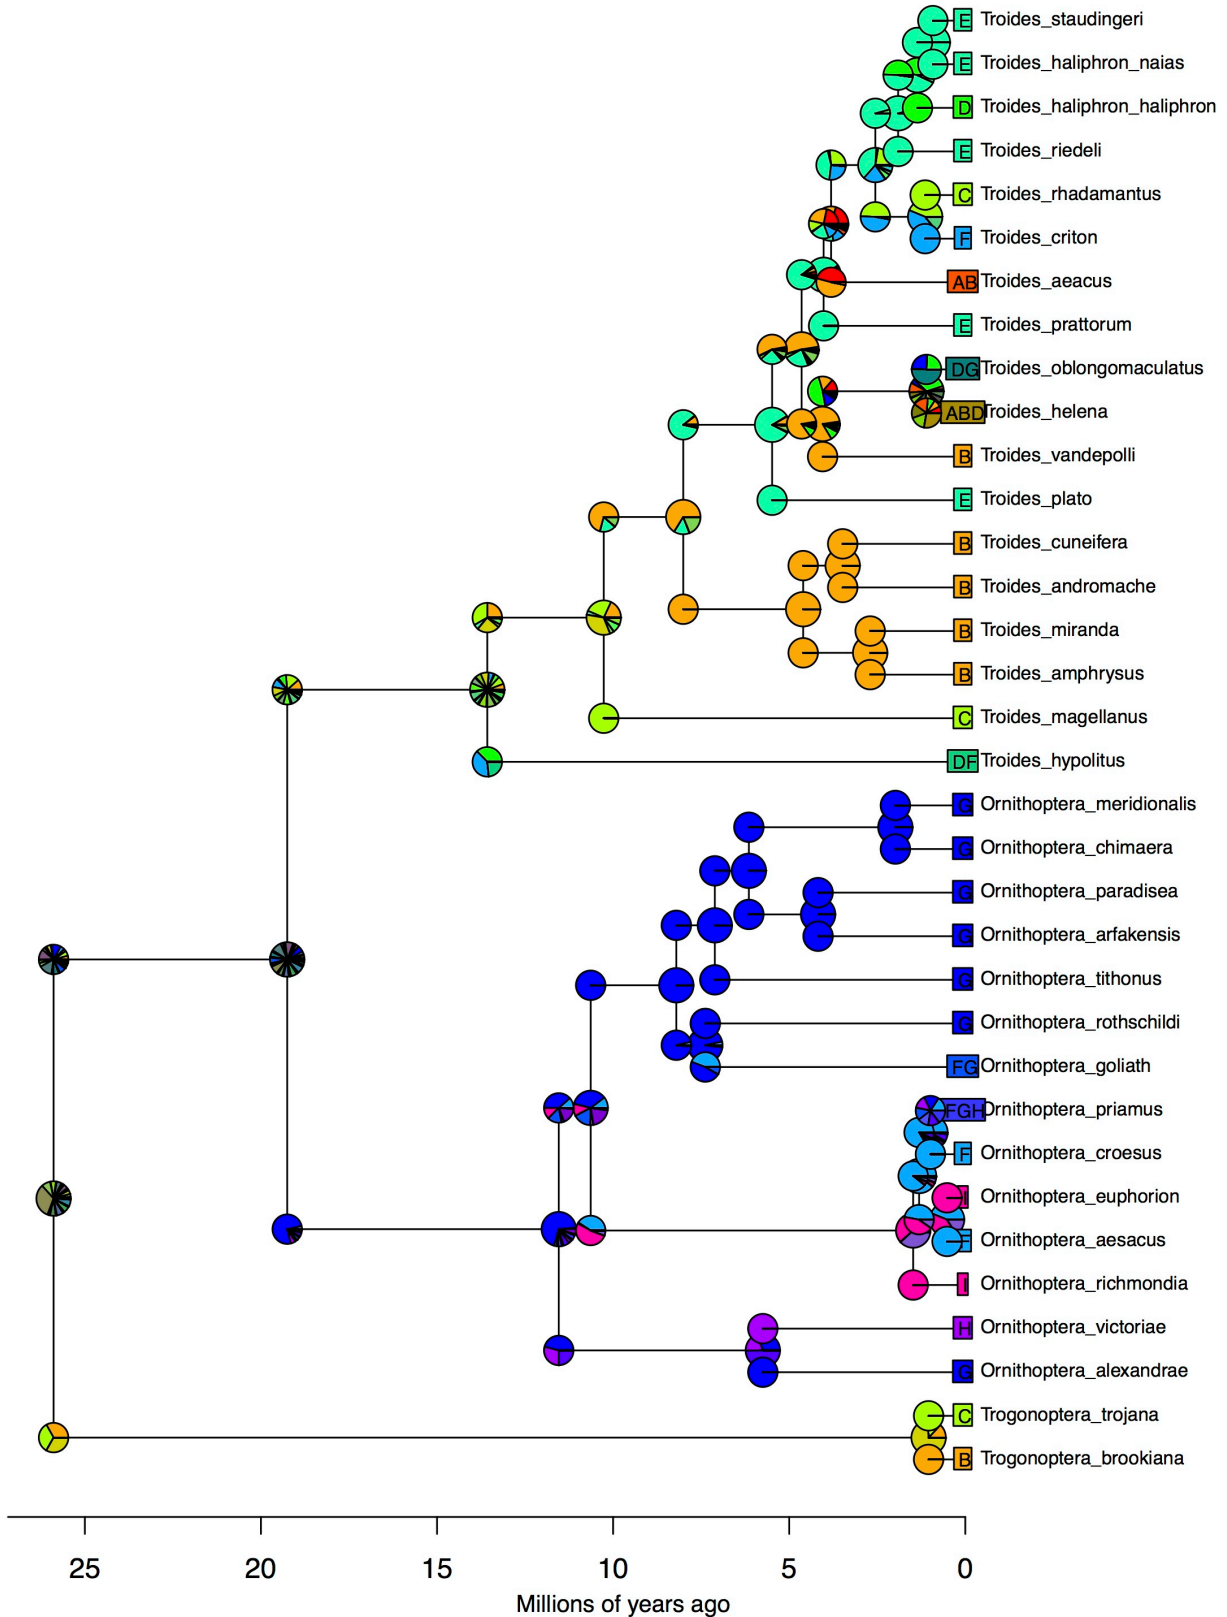

BioGeoBEARS BAYAREALIKE on Birdwings M0\_unconstrained  
 ancstates: global optim, 3 areas max. d=0.0178; e=0.1323; j=0; LnL=-120.68

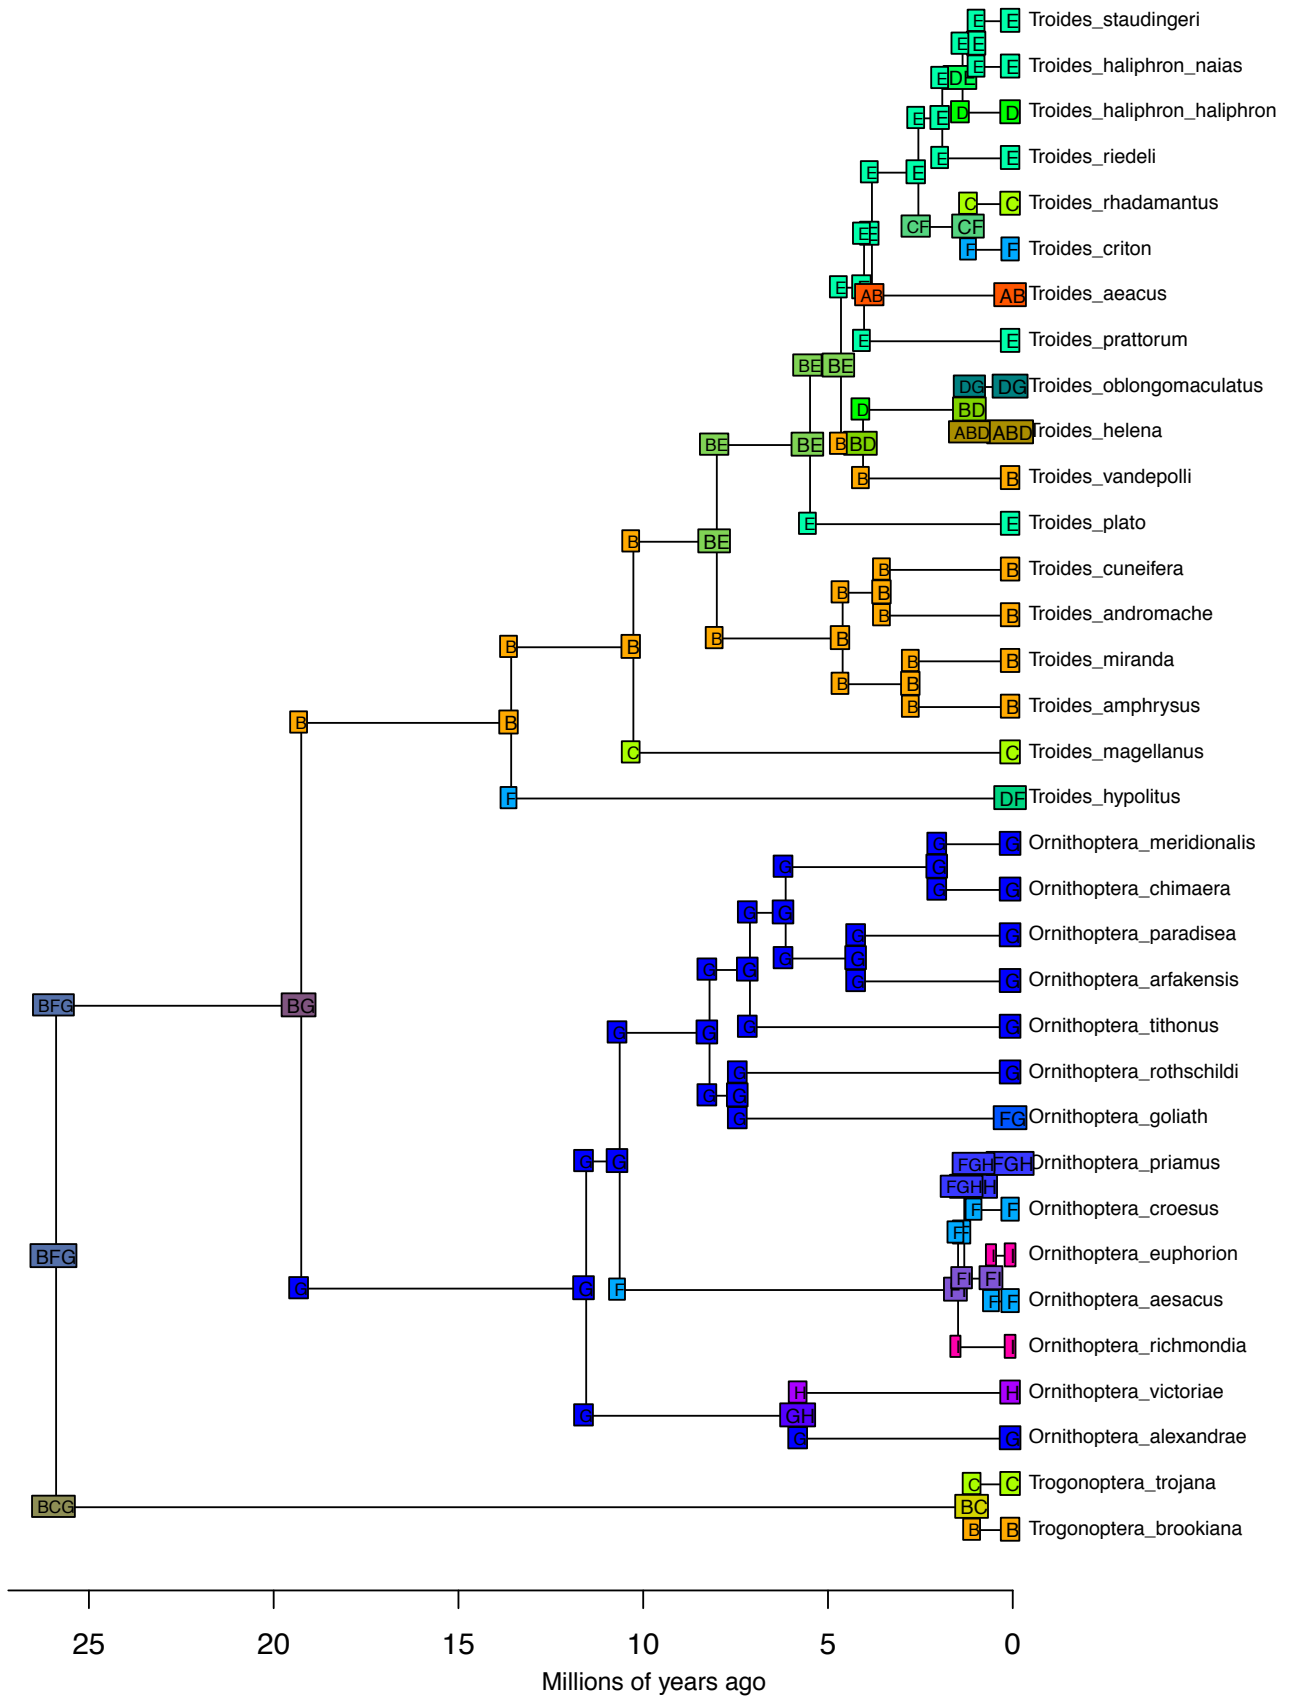

**BioGeoBEARS BAYAREALIKE on Birdwings M0\_unconstrained**  
 ancstates: global optim, 3 areas max. d=0.0178; e=0.1323; j=0; LnL=-120.68

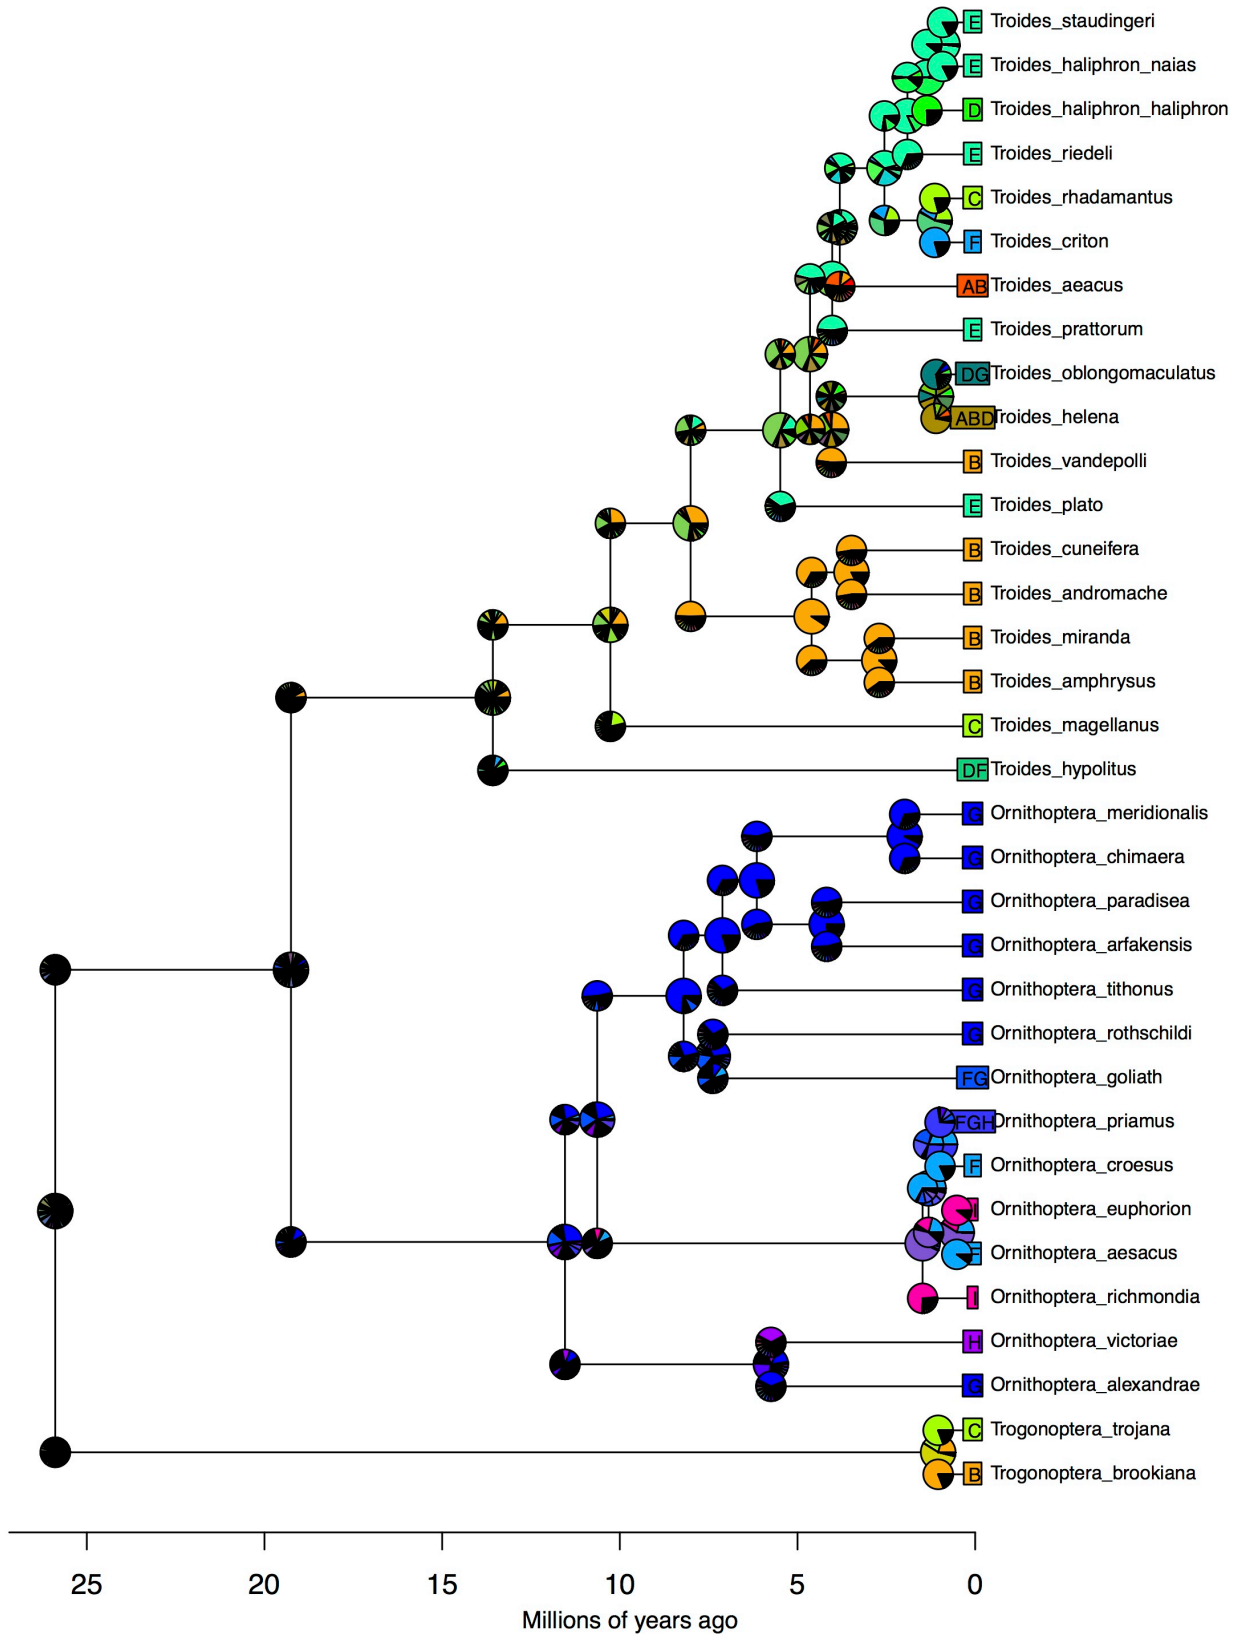

BioGeoBEARS BAYAREALIKE+J on Birdwings M0\_unconstrained  
 ancstates: global optim, 3 areas max. d=0.0043; e=0.0041; j=0.064; LnL=-97.15

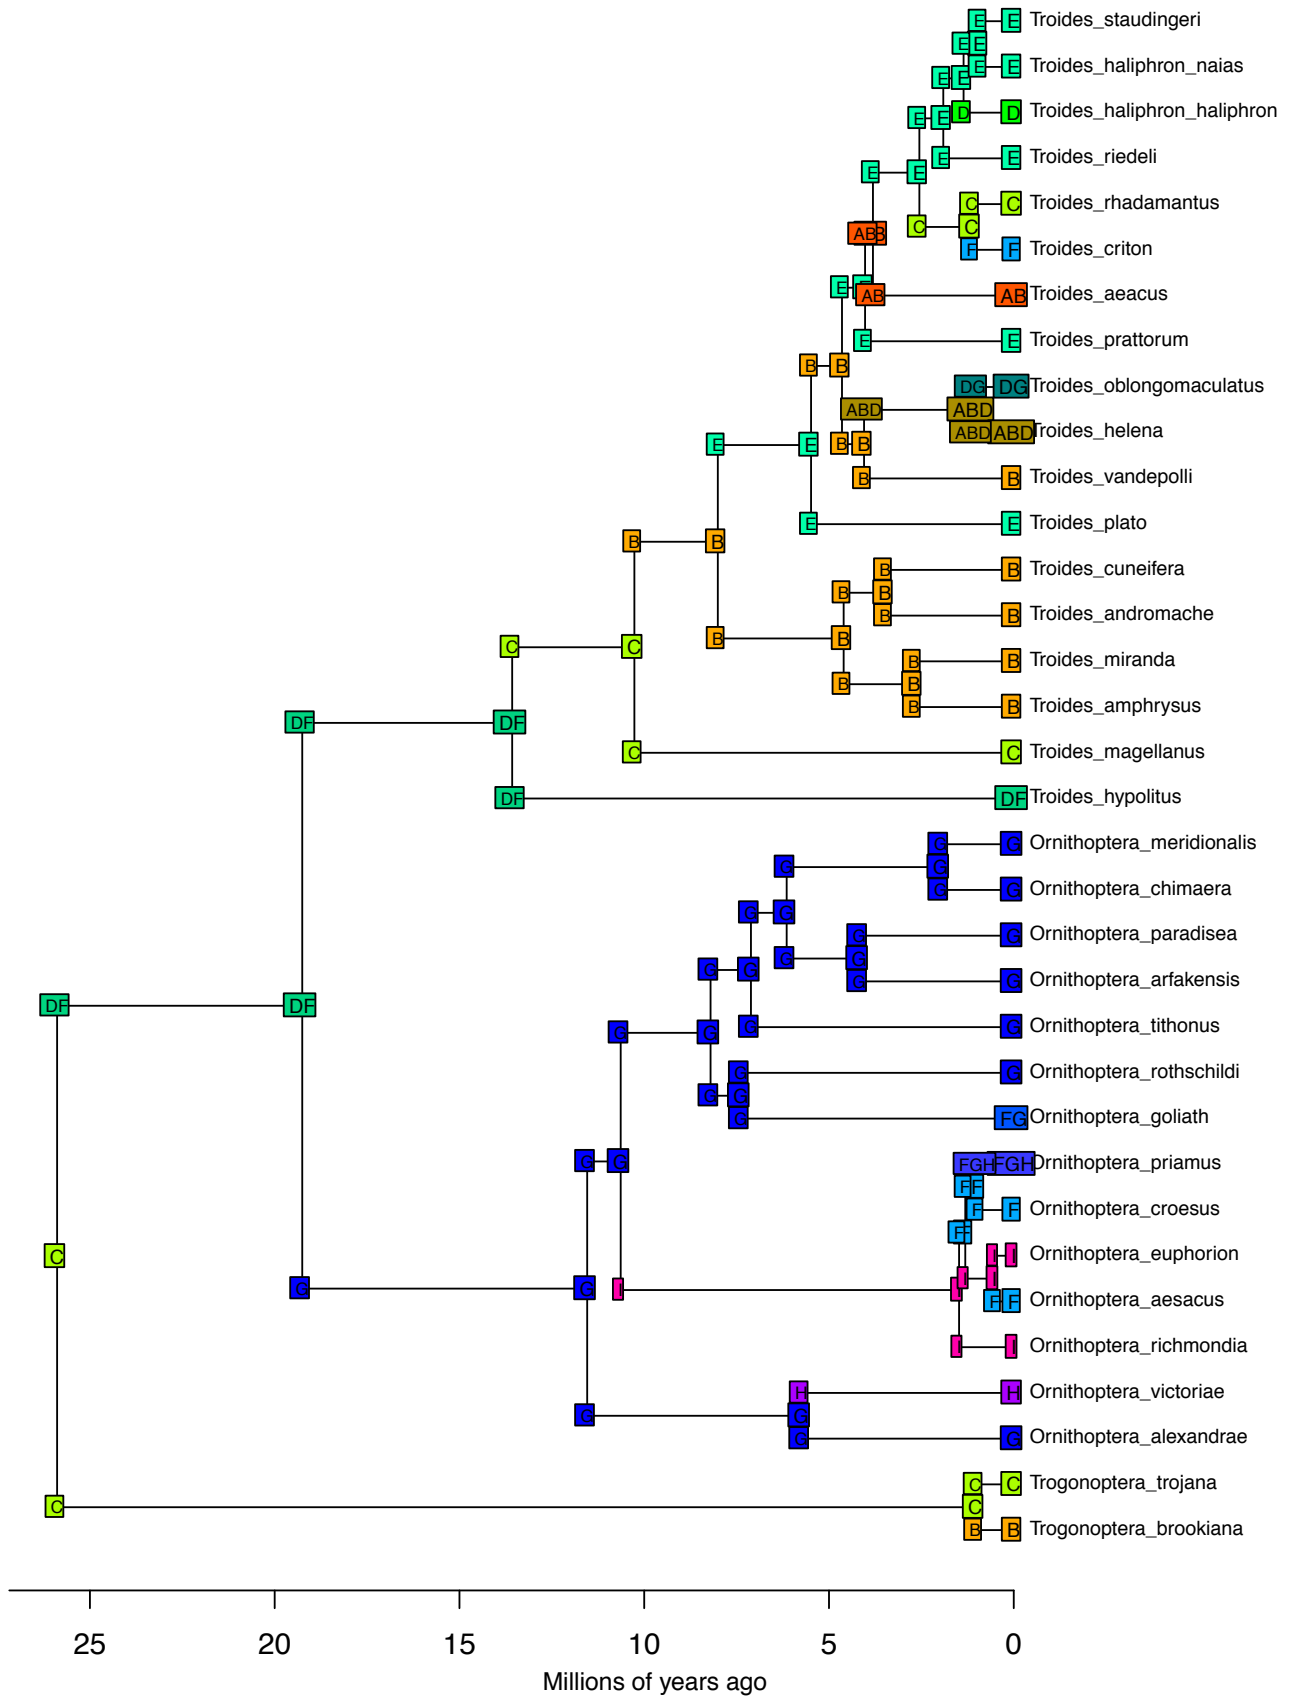

BioGeoBEARS BAYAREALIKE+J on Birdwings M0\_unconstrained  
 ancstates: global optim, 3 areas max. d=0.0043; e=0.0041; j=0.064; LnL=-97.15

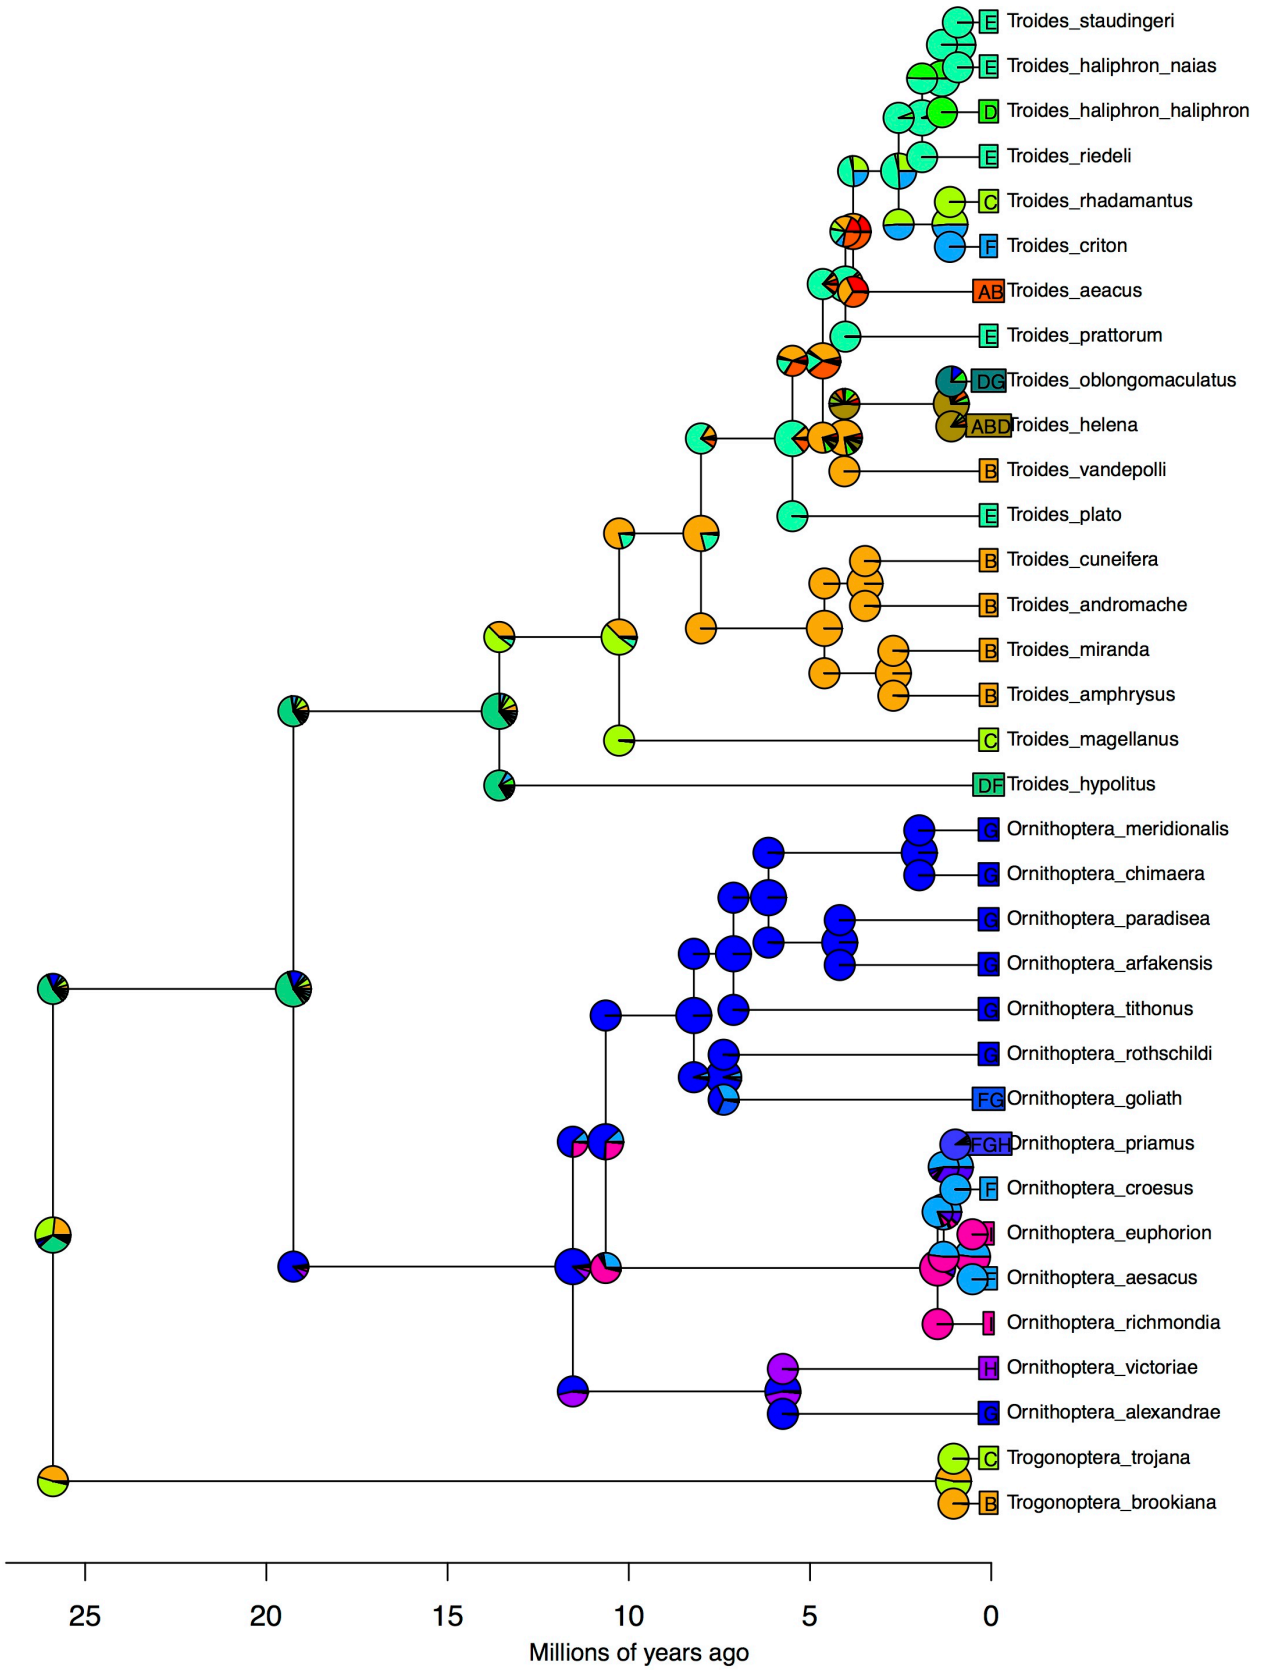

**Figure S4. Lineages-through-time plots of birdwing butterflies.** (a) Whole clade including the three genera. (b) Only the genus *Troides*. (c) Only the genus *Ornithoptera*. (d) Phylogeny of birdwing butterflies showing the three genera, and the timeline of their evolutionary history. M. Mioc., middle Miocene; L. Mioc., late Miocene; Pli., Pliocene. The Quaternary is the last period.

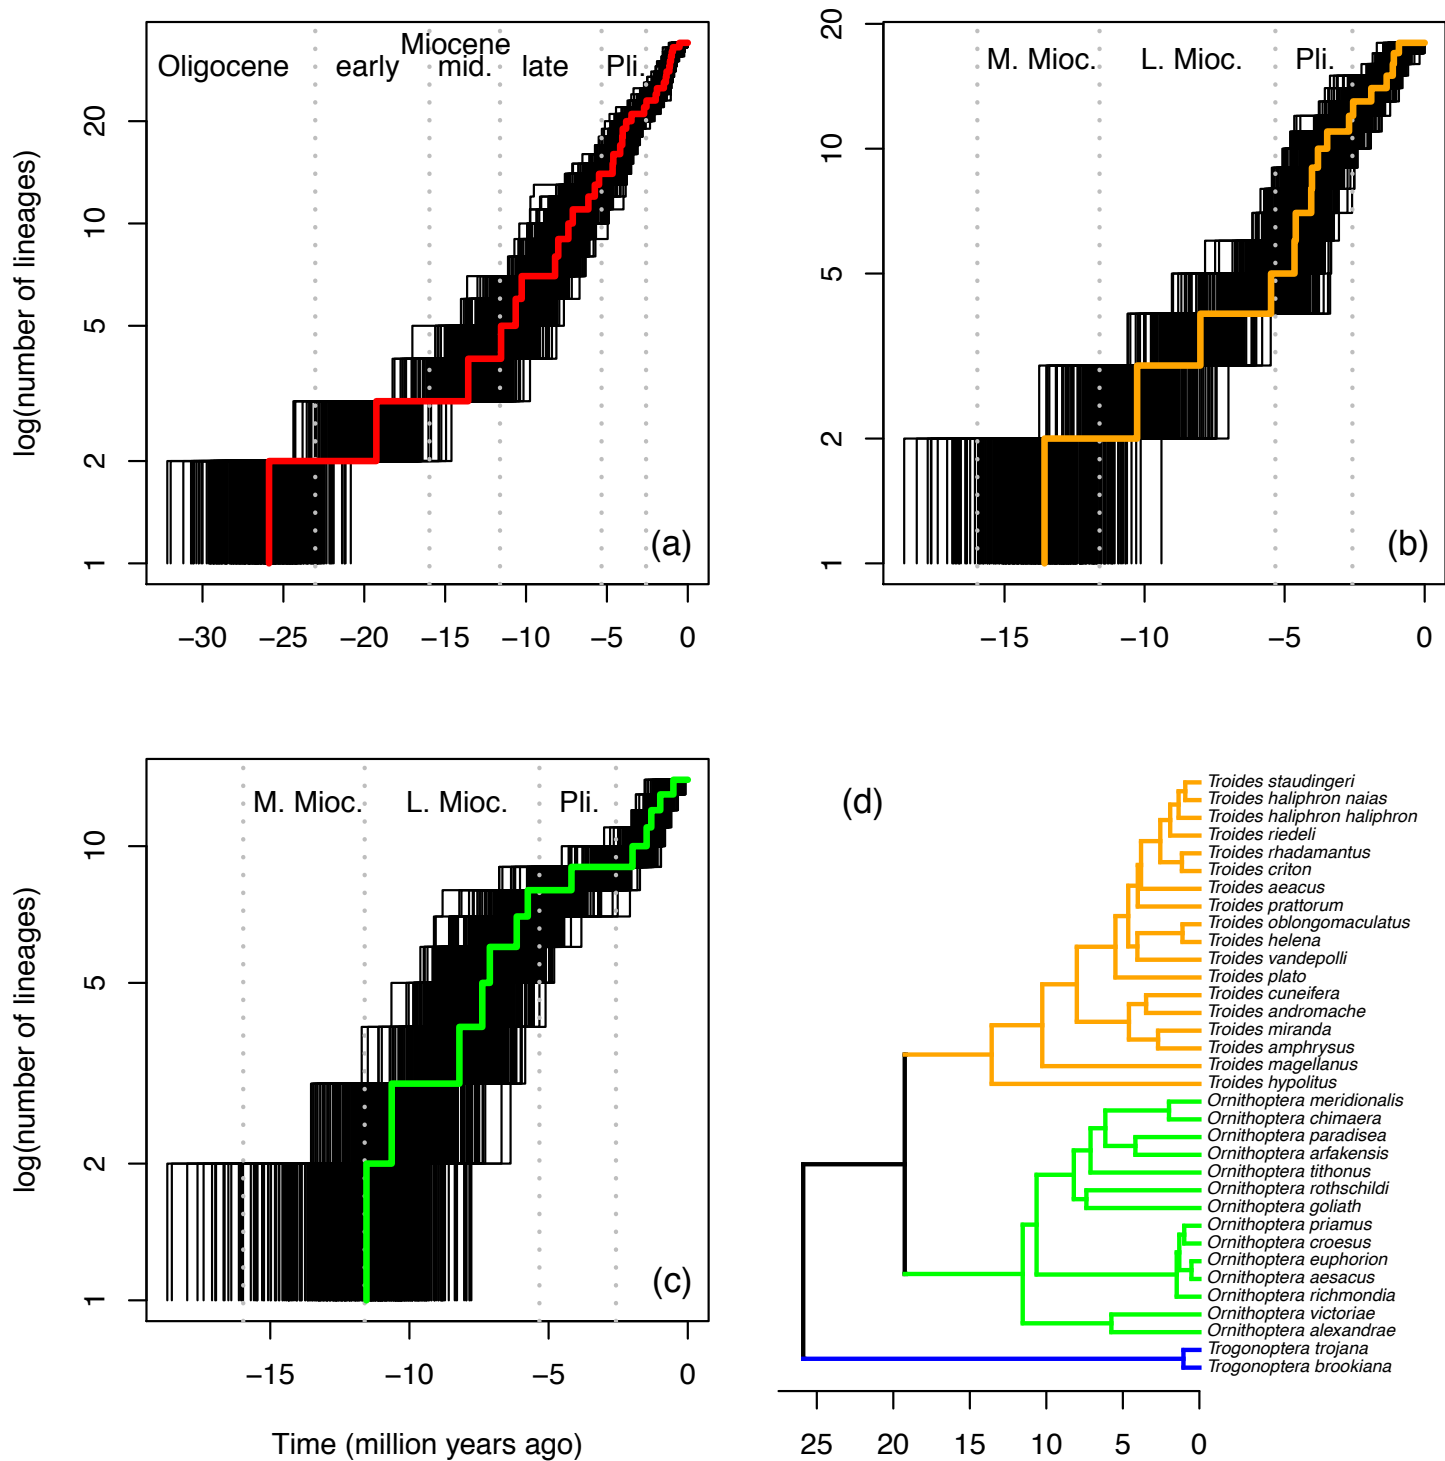

**Figure S5. Bayesian MCMC of the best fitting GeoSSE model.** (a) Estimate of speciation rate for both species occurring within and outside Wallacea (the rates are equal). (b) Estimate of extinction rate for both species occurring within and outside Wallacea (the rates are equal). (c) Estimate of transition rates (i.e. dispersal rates) out of Wallacea, and into Wallacea. (d) The rate out of Wallacea is higher than the other direction.

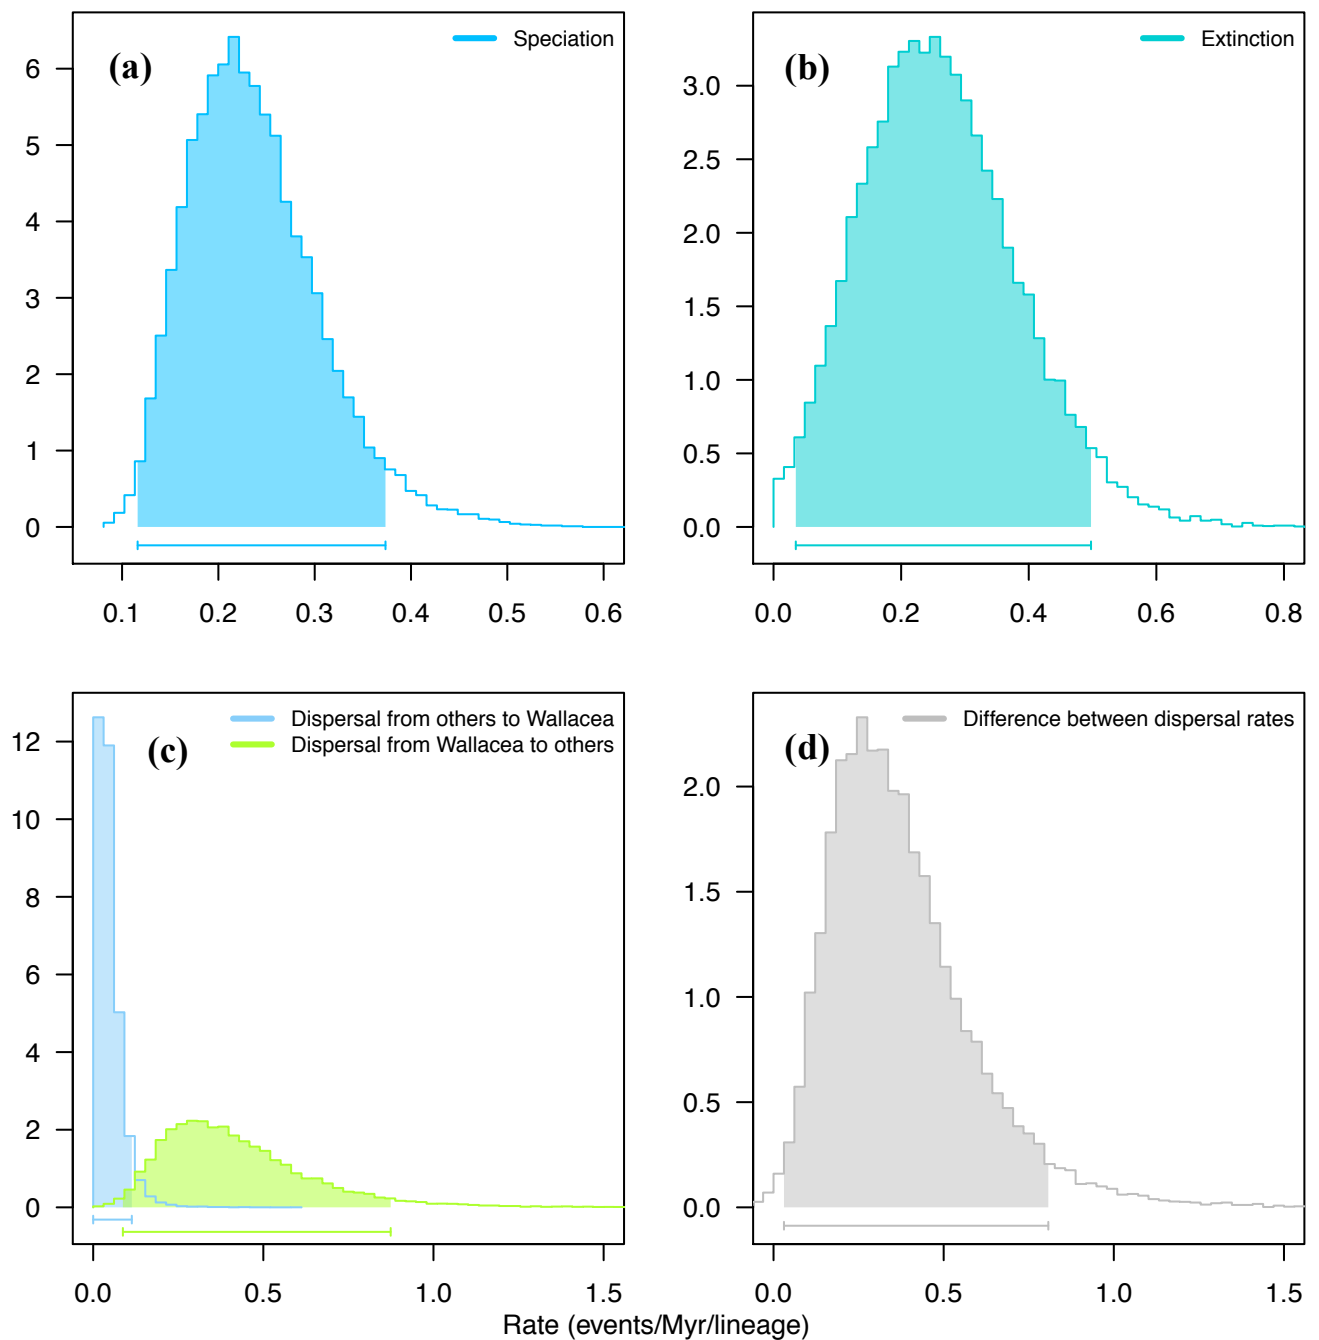

Supplement: srep11860-s1.pdf [file srep11860-s1.pdf]
